# Supplementary material
Source: PubMed Central journal article supplement (PMC8824277)
Supplement: aem.01486-21-s0001.pdf [file aem.01486-21-s0001.pdf]

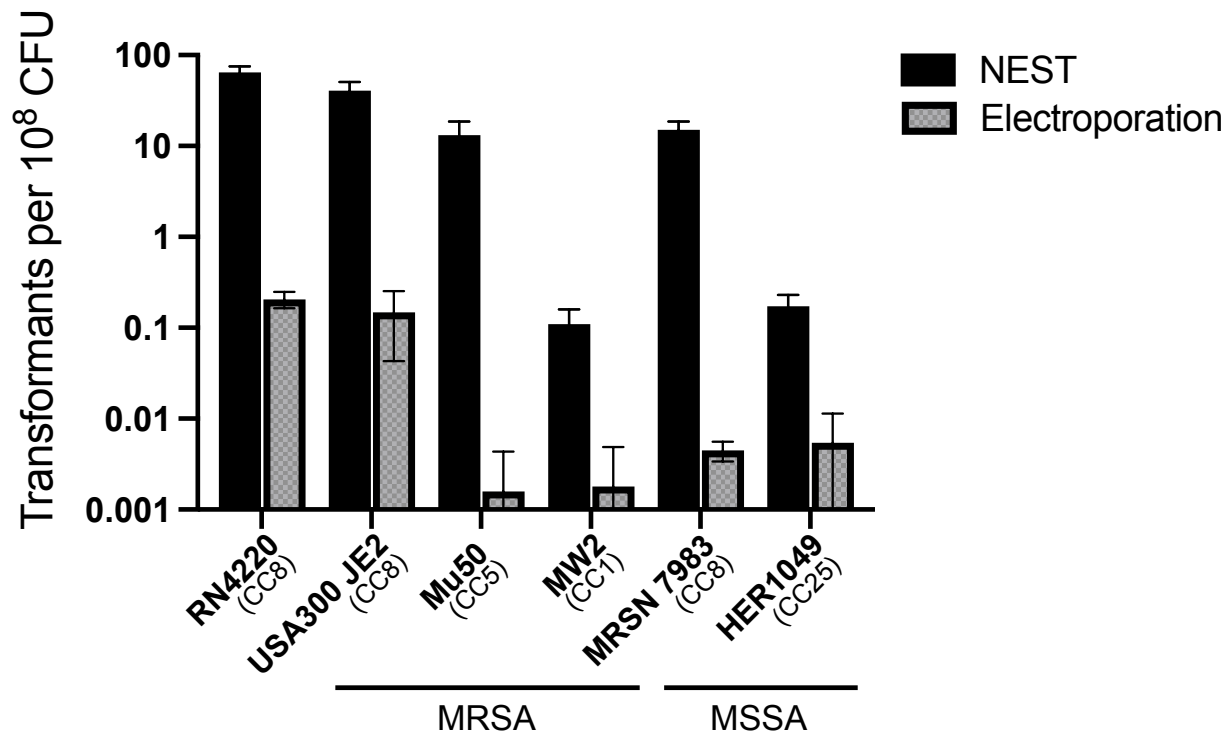

**Figure S1. Comparison of NEST vs. Electroporation transformation methods on other *S. aureus* strains.** Efficiency of transformation was determined using 300 ng of pCM28 plasmid isolated from *S. aureus* RN4220 transformed into NEST competent (black bars) or electrocompetent (gray bars) cells of clinical and *S. aureus* strains from different clonal complexes: RN4220 (control lab strain, CC8), JE2 (MRSA, CC8), Mu50 (MRSA, CC5), MW2 (MRSA, CC1), MRSN 7983 (MSSA, CC8) and HER1049 (MSSA, CC25). Efficiency of boot-up was determined by calculating the number of transformants per 10<sup>8</sup> CFU. For both methods, ~1×10<sup>10</sup> CFUs were used in transformation mixes. Each data point represents the mean from three independent experiments, and the error bars indicate standard error.

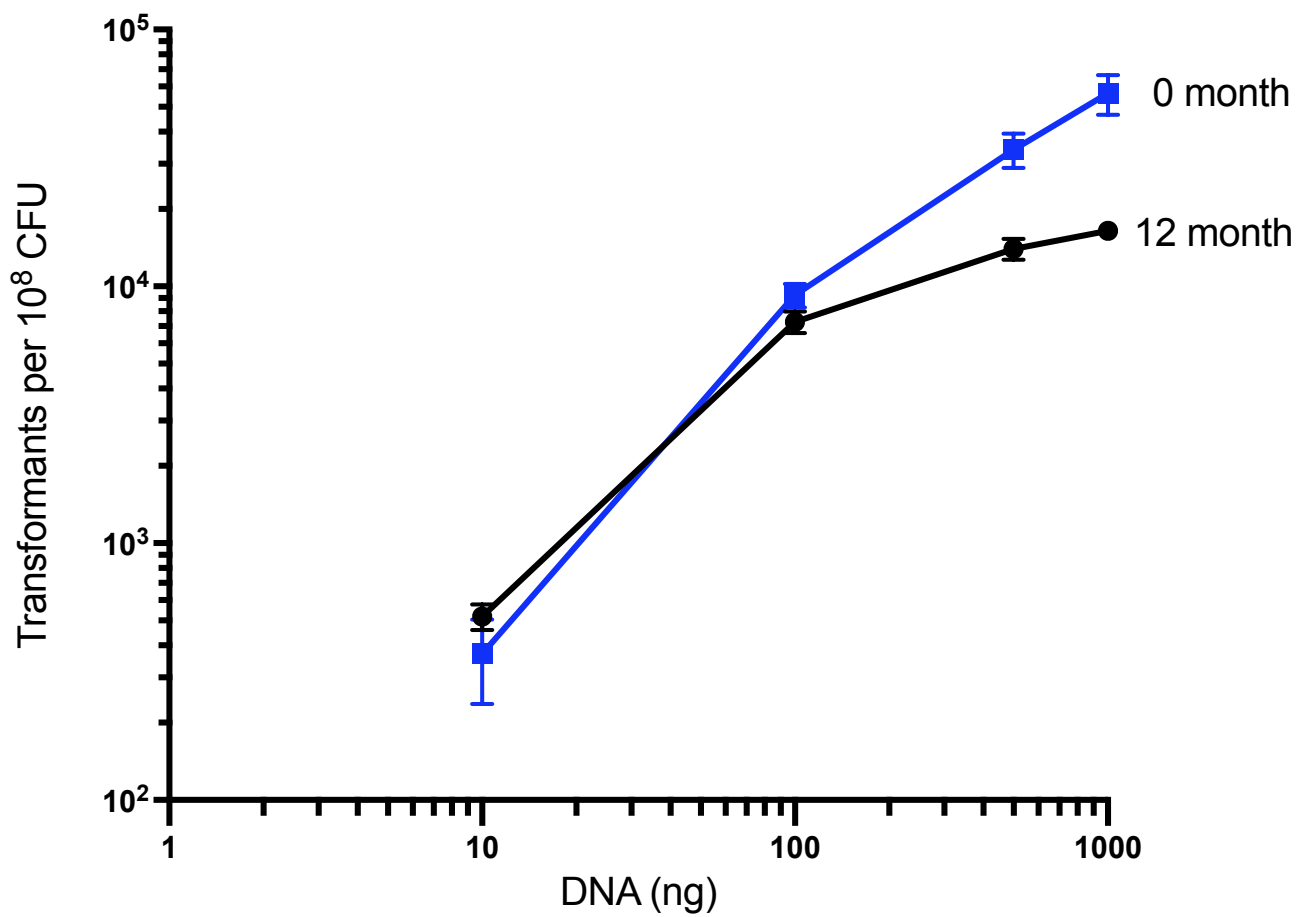

**Figure S2. Evaluating the long-term stability of NEST-competent cells.** Plasmid pCM28 was transformed into freshly prepared and year old frozen (-80°C) competent cells using the NEST method to evaluate long-term stability. Each data point represents the mean from three independent experiments, and the error bars indicate standard error.

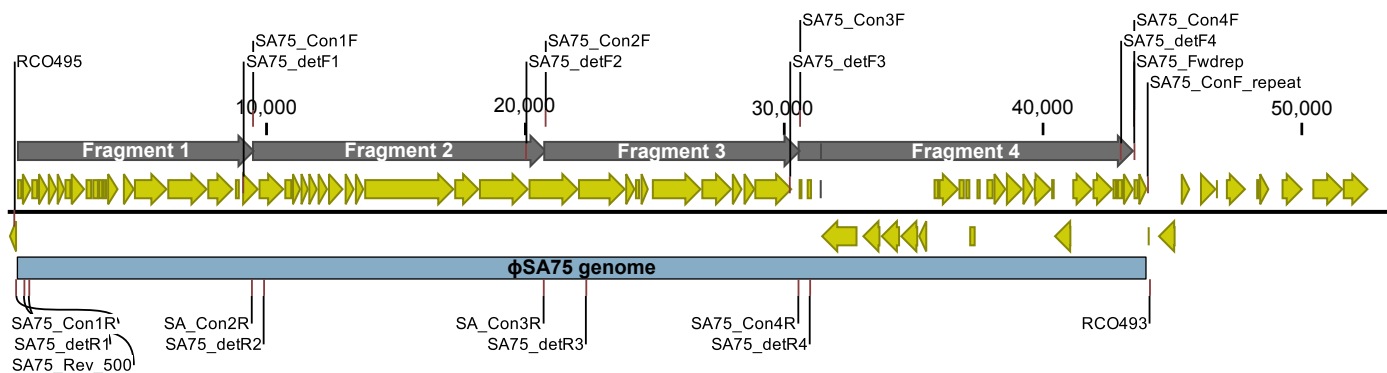

**Figure S3. Sequence of the synthetic yeast-assembled SA75 phage genome.** The complete sequence of SA75YA was determined on an Illumina NovaSeq 6000 Sp, 300 cycles (2×150) Xp workflow (see below). Above is a linear illustration of assembled SA75 genome within the yeast Ycp vector. Predicted protein-coding sequences are denoted as yellow arrows. A light blue arrow marks the location of the phage SA75 genome within the yeast Ycp/BAC vector while the dark gray arrow delineates the position of each of the four cloned SA75 fragments.

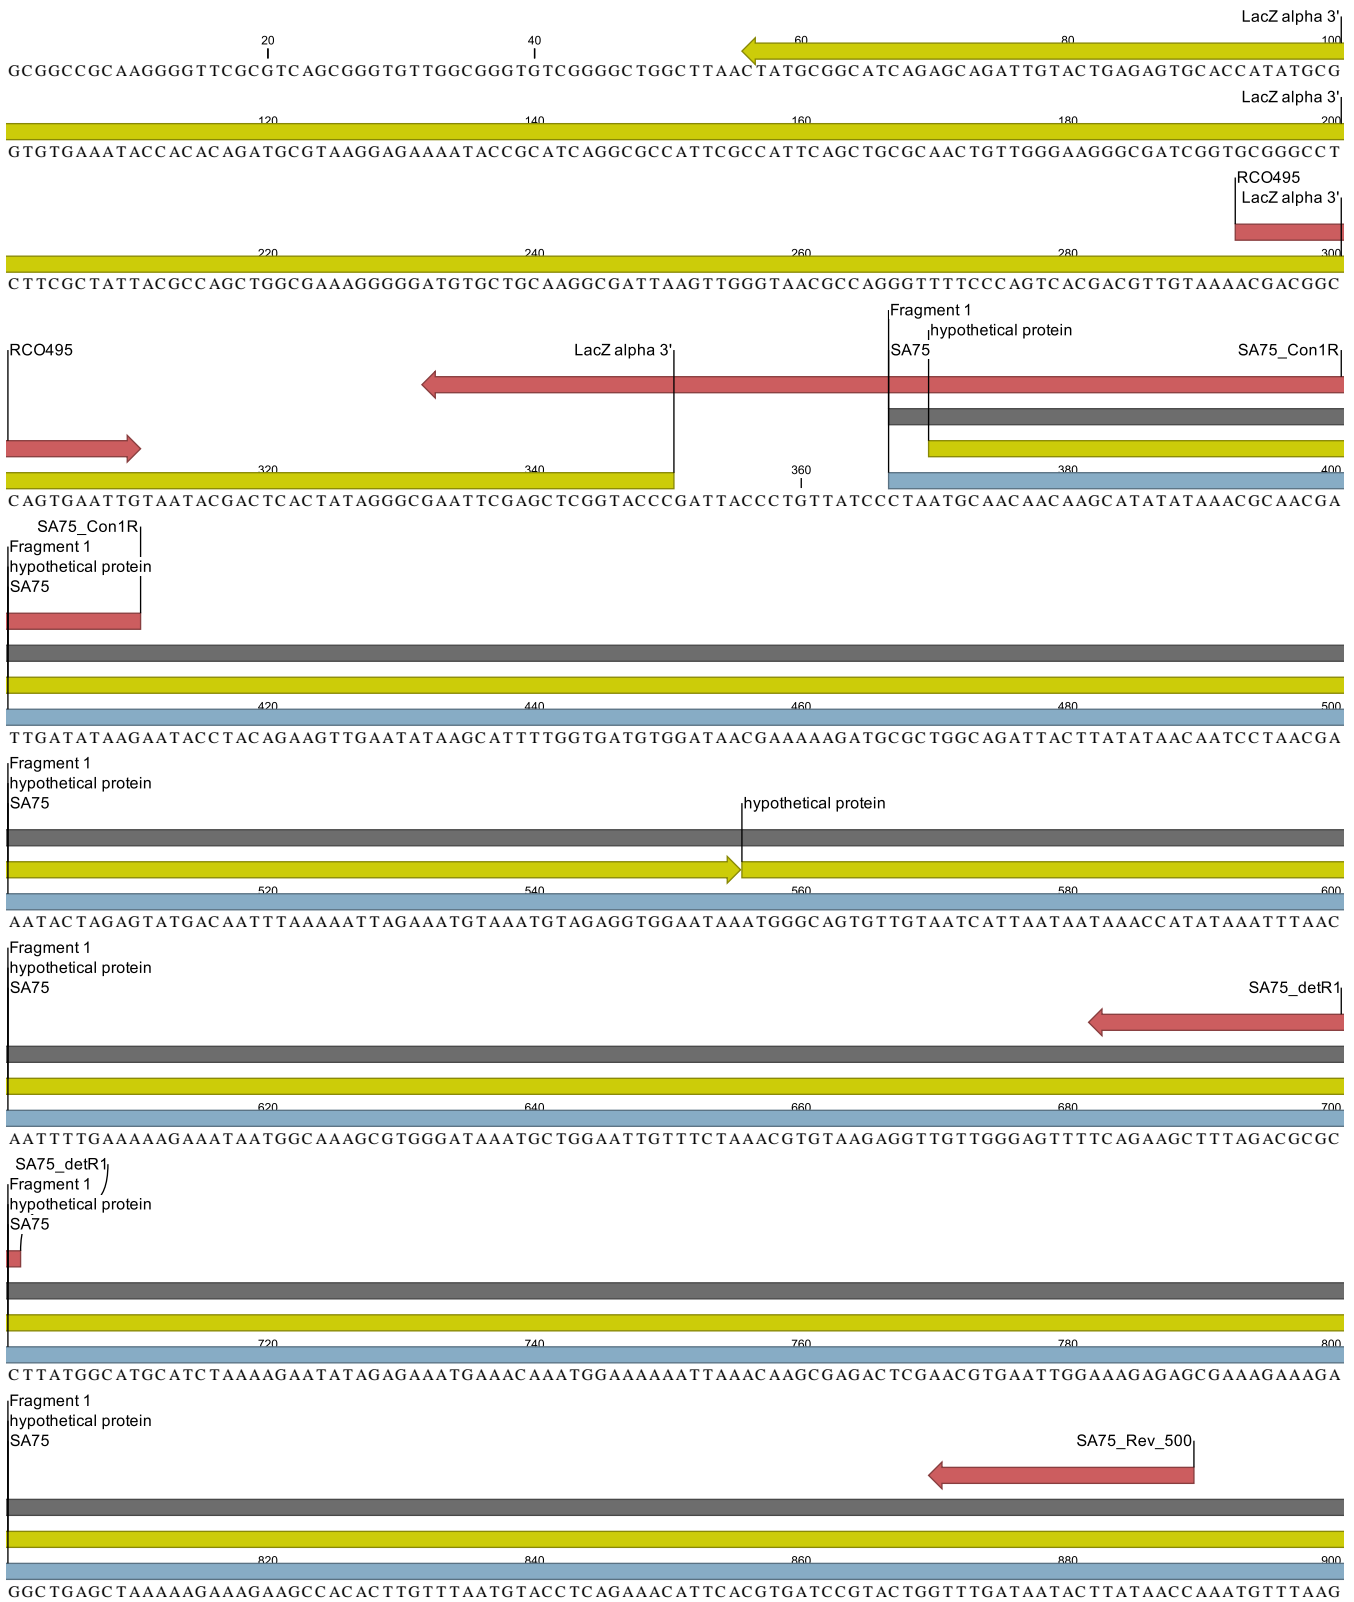

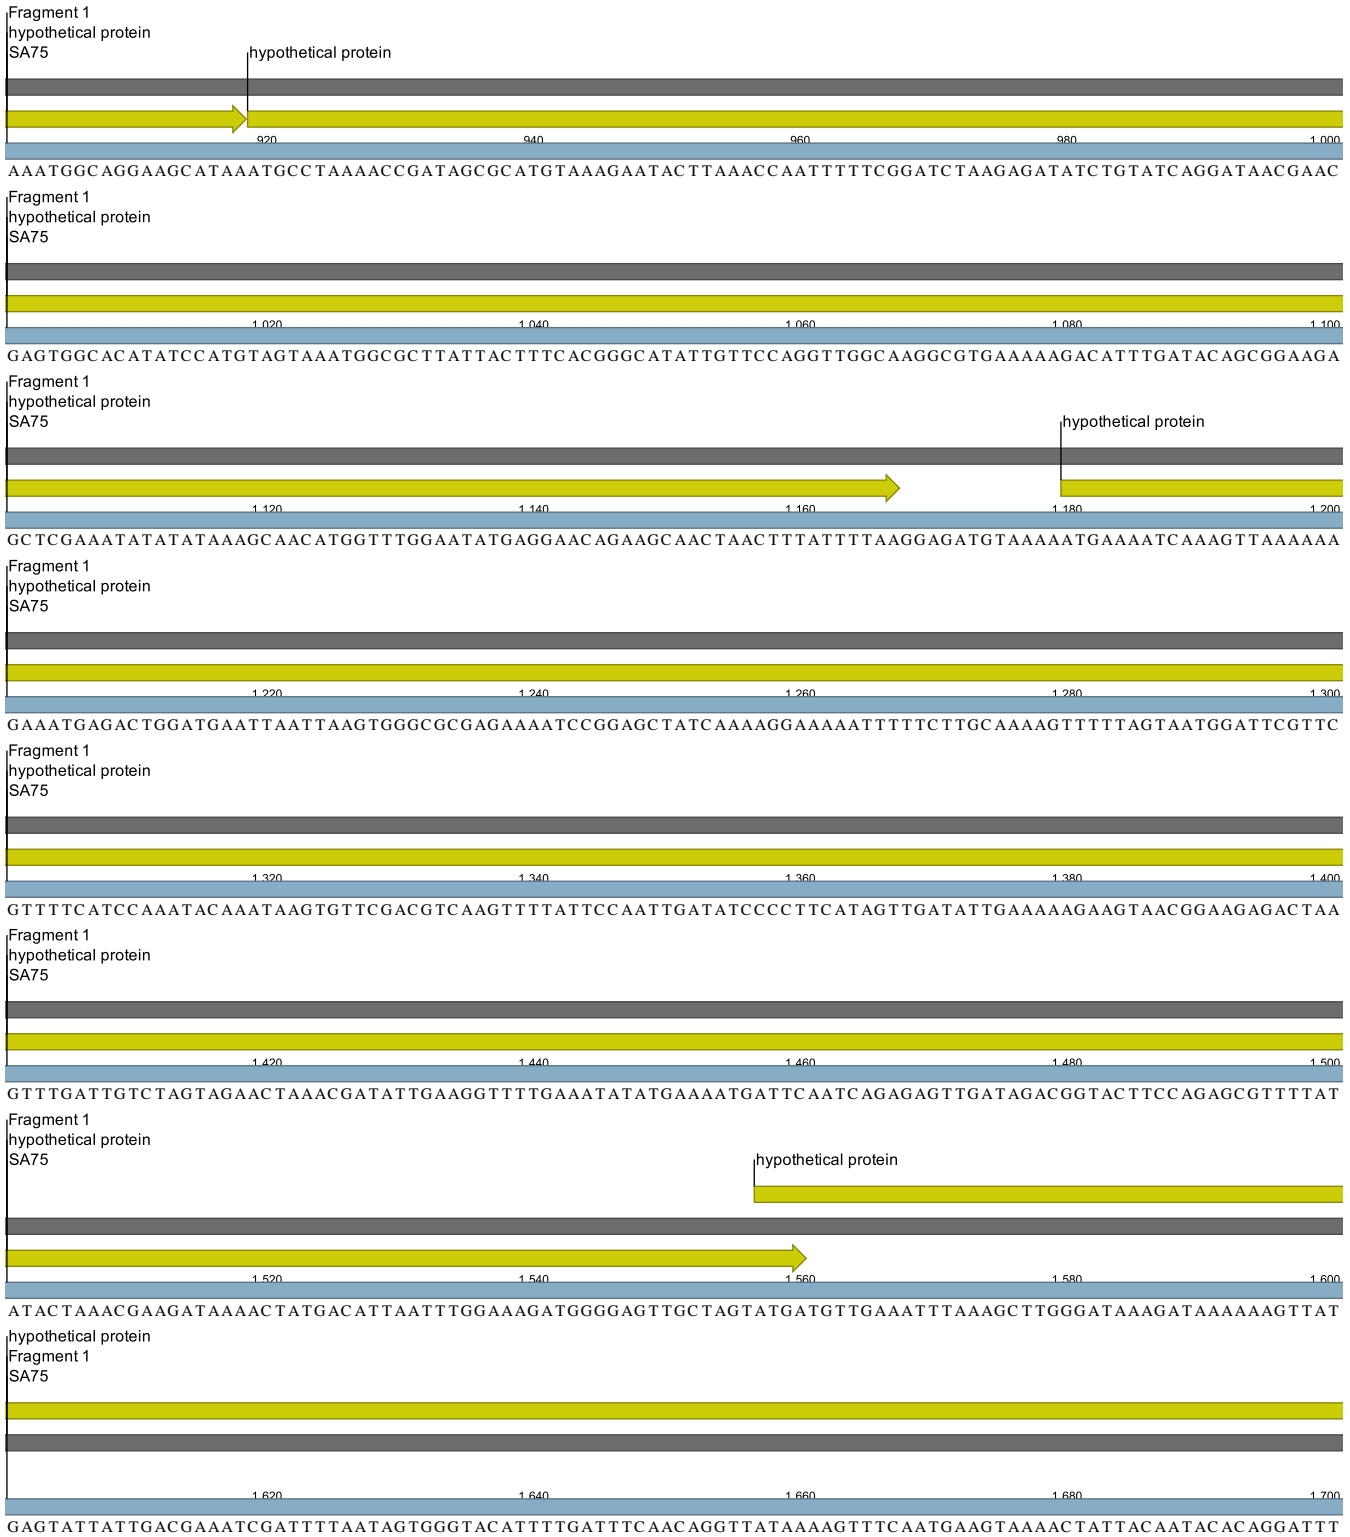

hypothetical protein  
Fragment 1  
SA75

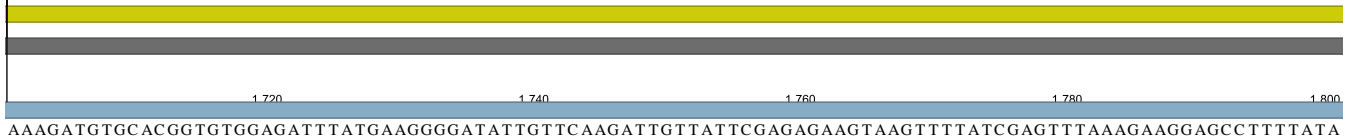

AAAGATGTGCACGGTGTGGAGATTATGAAGGGGATATTGTTCAAGATGTTATTCGAGAGAAGTAAGTTTTATCGAGTTTAAAGAAGGAGCCTTTATA

hypothetical protein  
Fragment 1  
SA75

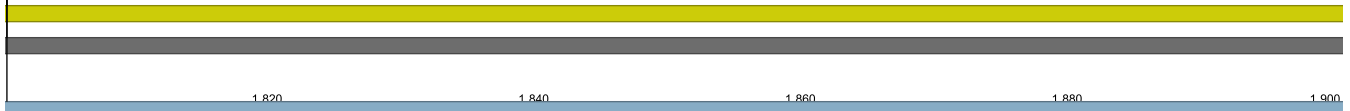

TAACTTTTAGCAATGTAAC TGAATTACTAAGTGAAAATGACGATATTATTGAAATTGTTGGAAATATTTTTGAAAATGAGATGCTATTGGAGGTTATGAG

hypothetical protein  
Fragment 1  
SA75

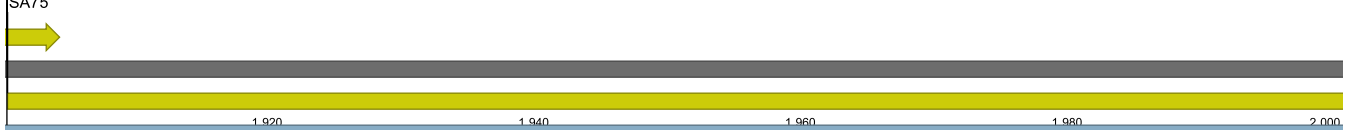

ATGACGTTACCTTATCAGATGAACAATATAAAAATCTTTGTAAC TCTAAC AAGTTATTAGATAAACTTCAAAAGCATTAAAGATCGTGAAGAGT

Fragment 1  
hypothetical protein  
SA75

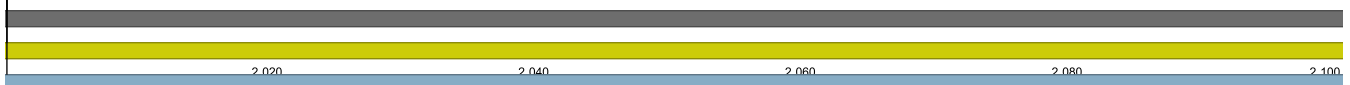

ACAAGAAGCAACGATATGAGCTTATTGGGGTTATAGCGAAGTTACGAGATTGTAAACAAAGAAC TGGAGAAGAAAGCAAGCGCATGGGATAGGTATTGCAA

Fragment 1  
hypothetical protein  
SA75

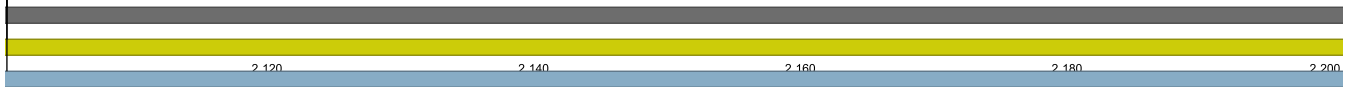

GAGCGTTGAAAGAGATTTAATAAACAAATTCGGTAACGATGATGAAAGAGTTAAATTCGGAAATGGAATTAACAAATAAAATTTTTATGGAGGATGACACA

hypothetical protein  
Fragment 1  
SA75

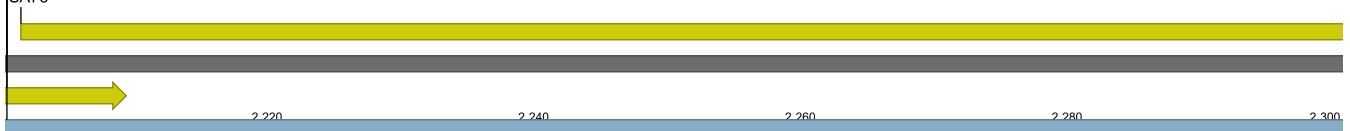

AATGAATAATCGCGAAAAATCGAACAGTCCGTTATTAGTGC TAGTGCGTATAACGGTAATGACACAGAGGGATTACTAAAAGAGTTGAAGACGTGTAT

hypothetical protein  
Fragment 1  
SA75

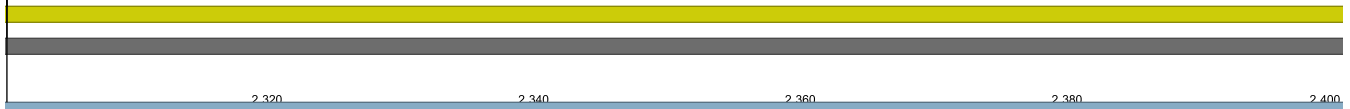

AAGAAAGCGCAAGCGTTTGATGAAATACTTGAGGGTTACCTAATGCTATGCAAGATGC ACTCAAAGAAGATATTGAACCTTGATGAAGCAGTAGGGATTA

hypothetical protein  
Fragment 1  
SA75

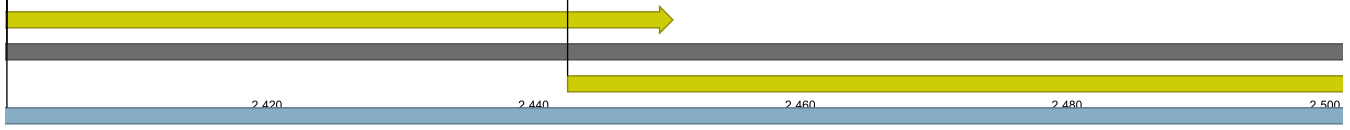

TGACGGGTCAAGTTGTCATAAAATGAGGAGGCACAGGAAAATGACTAACACATTAACAATTGATCAGTTAC AAGAGTTATTACAAATACAAAAGAGT

Fragment 1  
dut  
SA75

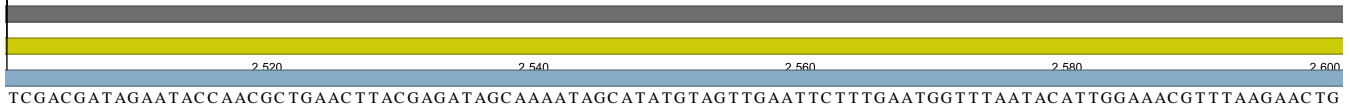

Fragment 1  
dut  
SA75

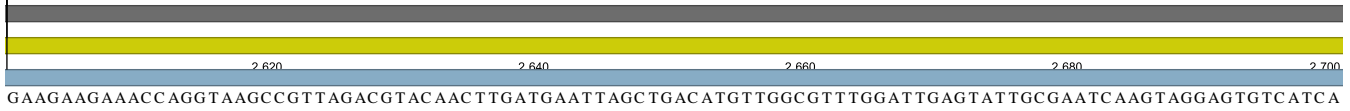

Fragment 1  
dut  
SA75

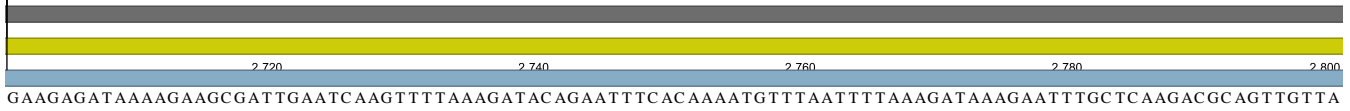

Fragment 1  
dut  
SA75

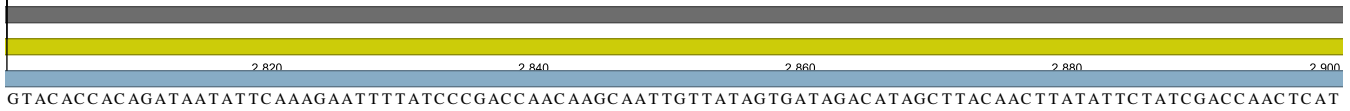

Fragment 1  
dut  
SA75

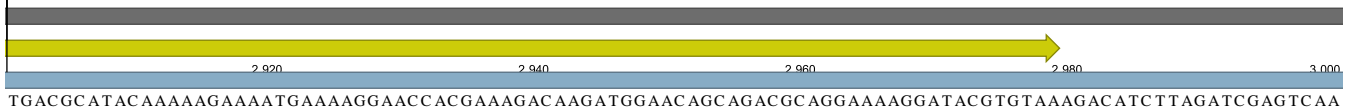

Fragment 1  
SA75

hypothetical protein

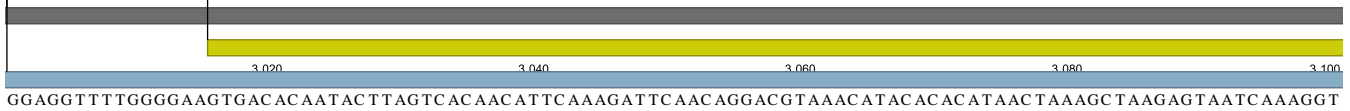

Fragment 1  
hypothetical protein  
SA75

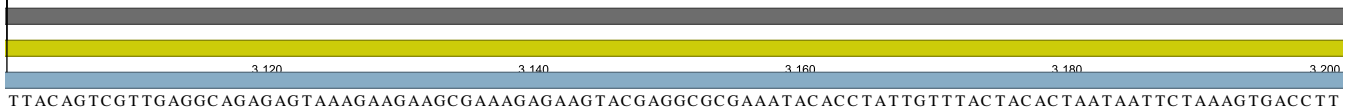

Fragment 1  
hypothetical protein  
SA75

hypothetical protein

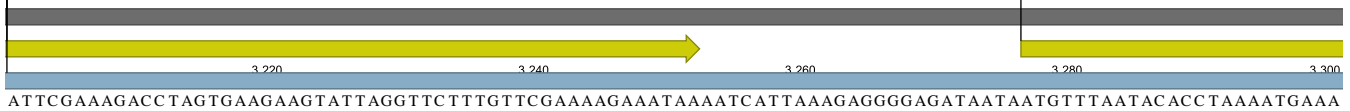

Fragment 1  
hypothetical protein  
SA75

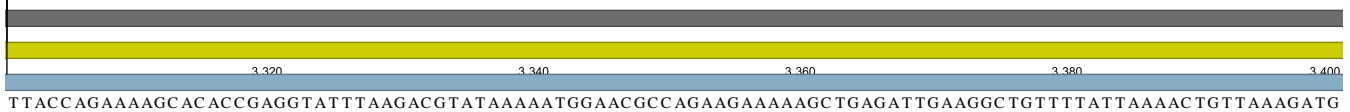

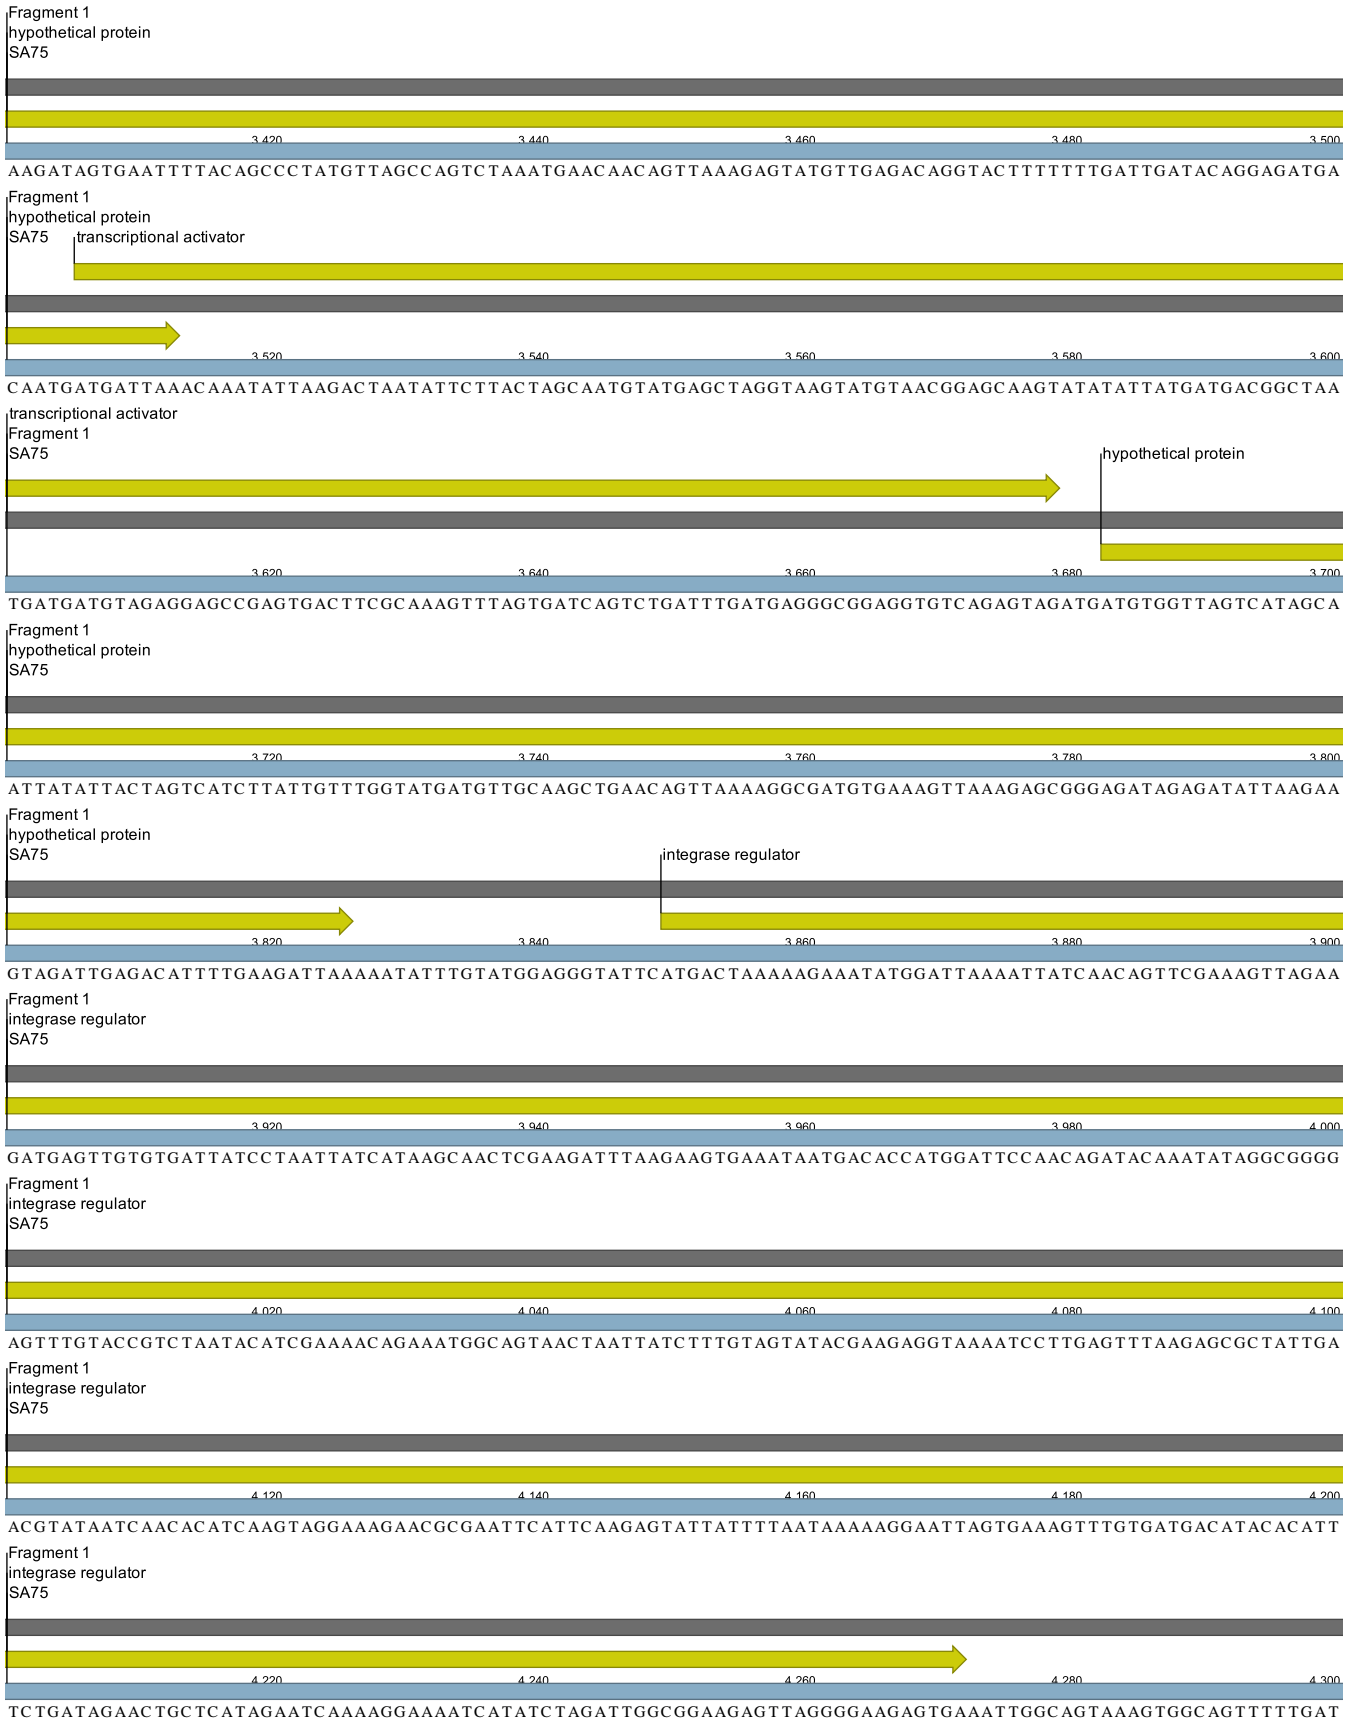



Fragment 1  
SA75

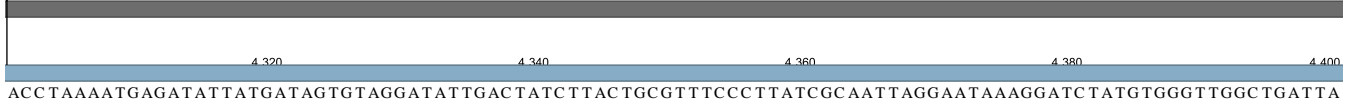

Fragment 1  
SA75

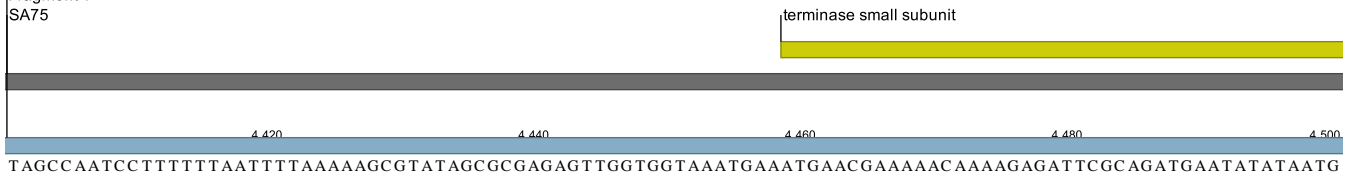

terminase small subunit

Fragment 1  
SA75

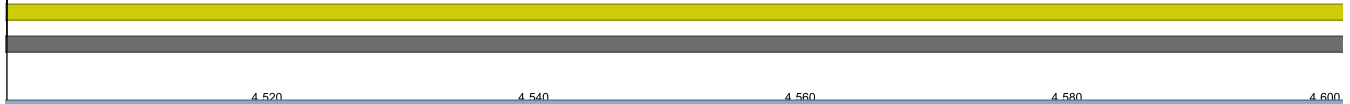

terminase small subunit

Fragment 1  
SA75

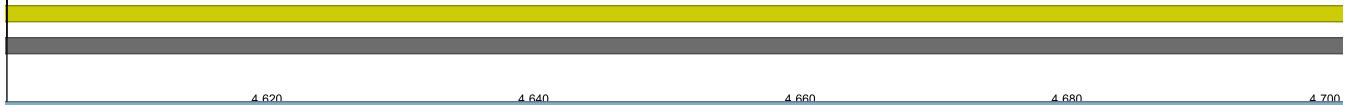

terminase small subunit

Fragment 1  
SA75

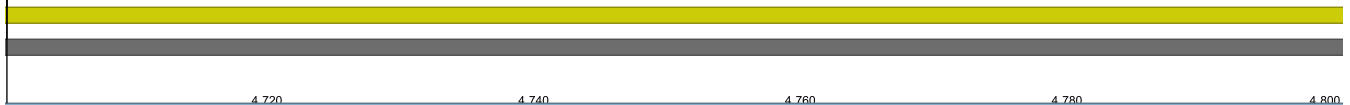

terminase small subunit

Fragment 1  
SA75

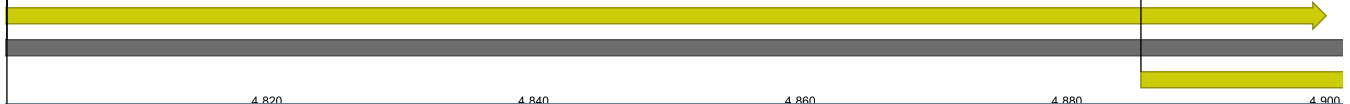

terminase large subunit

Fragment 1  
terminase large subunit  
SA75

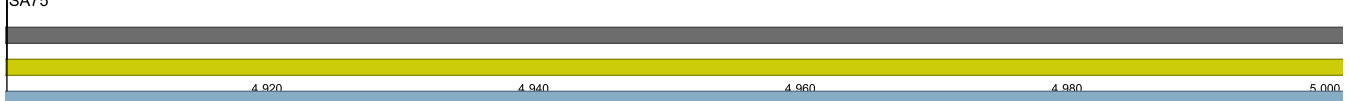

Fragment 1  
terminase large subunit

SA75

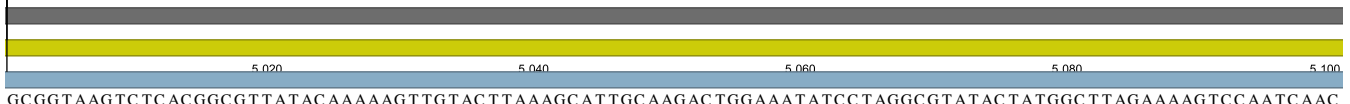

Fragment 1  
terminase large subunit  
SA75

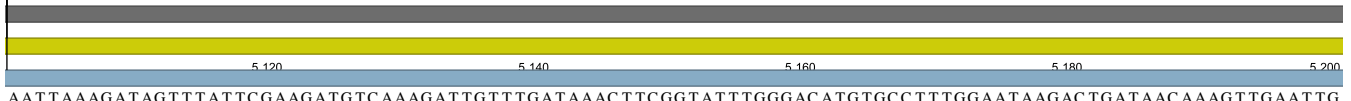

Fragment 1  
terminase large subunit  
SA75

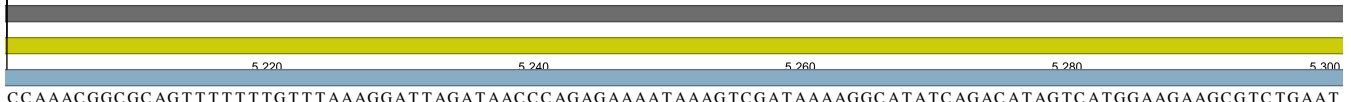

Fragment 1  
terminase large subunit  
SA75

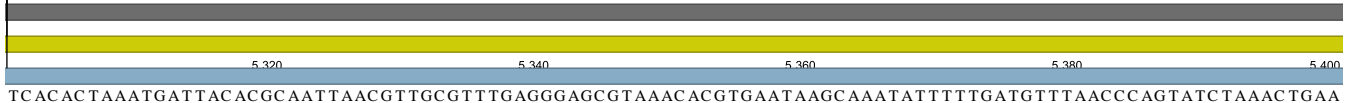

Fragment 1  
terminase large subunit  
SA75

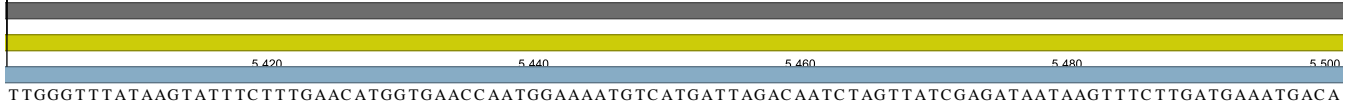

Fragment 1  
terminase large subunit  
SA75

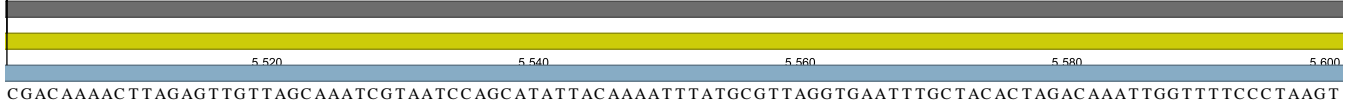

Fragment 1  
terminase large subunit  
SA75

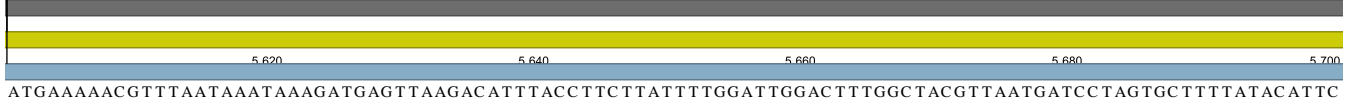

Fragment 1  
terminase large subunit  
SA75

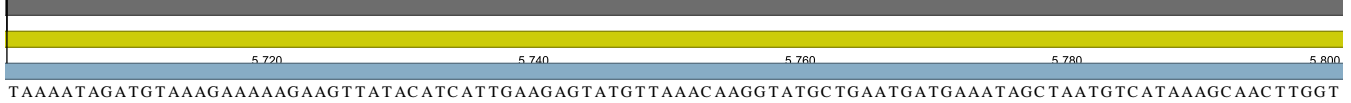

Fragment 1  
terminase large subunit  
SA75

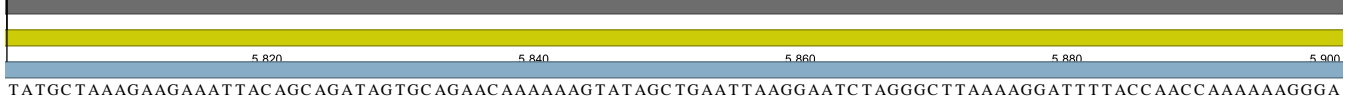

Fragment 1  
terminase large subunit  
SA75

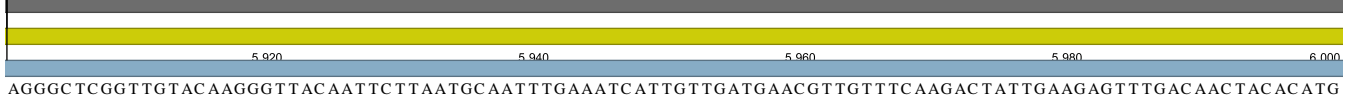

Fragment 1  
terminase large subunit  
SA75

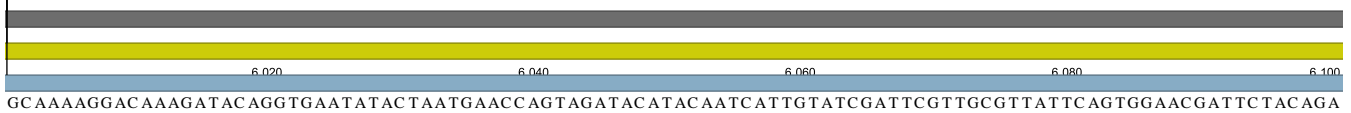

Fragment 1  
terminase large subunit  
SA75

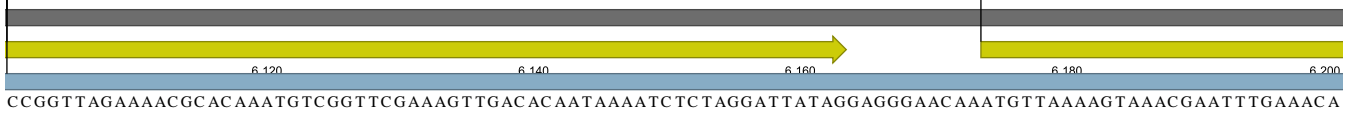

Fragment 1  
portal protein  
SA75

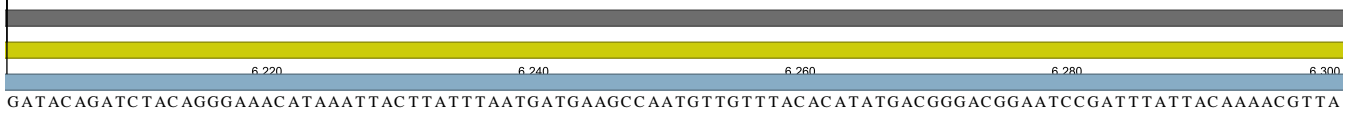

Fragment 1  
portal protein  
SA75

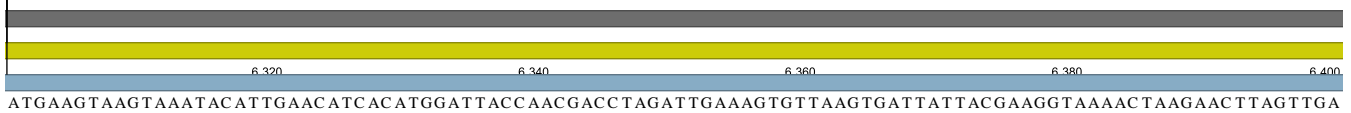

Fragment 1  
portal protein  
SA75

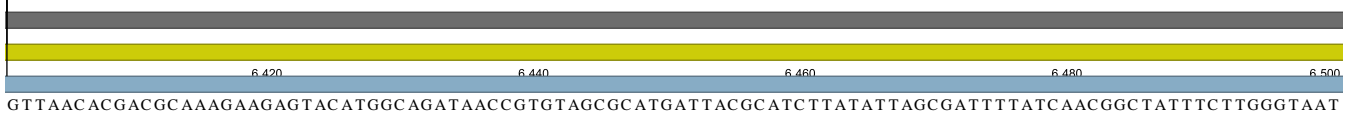

Fragment 1  
portal protein  
SA75

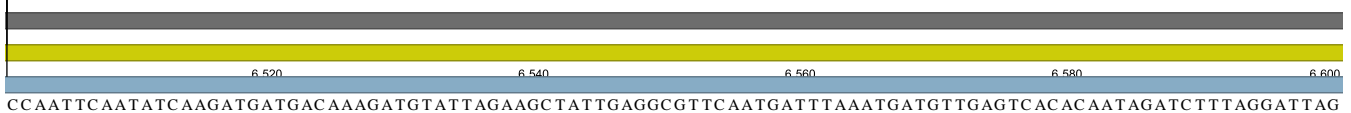

Fragment 1  
portal protein  
SA75

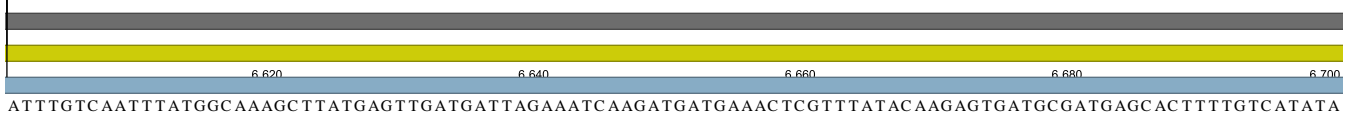

Fragment 1  
portal protein  
SA75

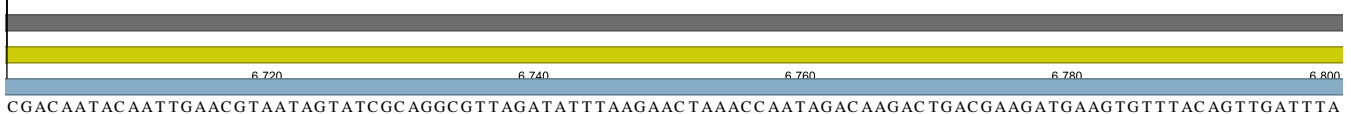

Fragment 1  
portal protein  
SA75

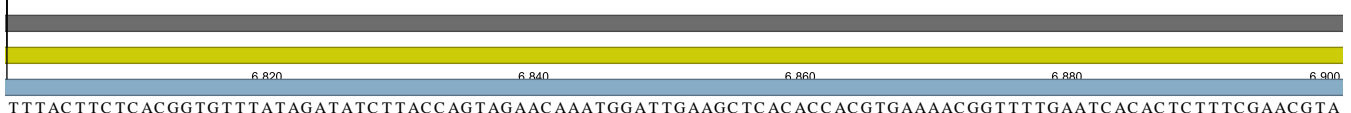

Fragment 1  
portal protein  
SA75

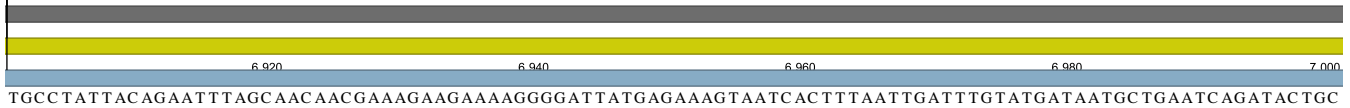

Fragment 1  
portal protein  
SA75

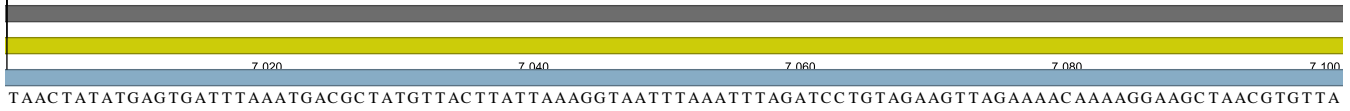

Fragment 1  
portal protein  
SA75

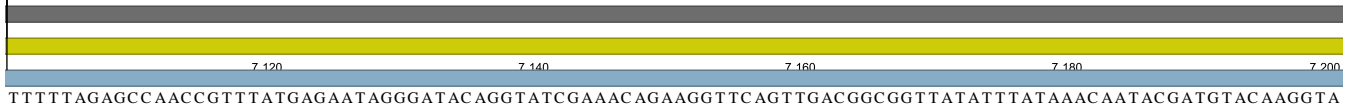

Fragment 1  
portal protein  
SA75

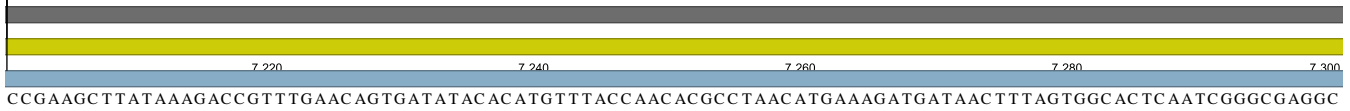

Fragment 1  
portal protein  
SA75

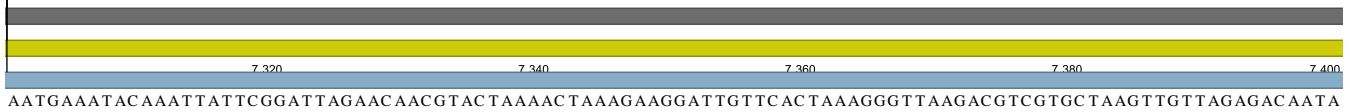

Fragment 1  
portal protein  
SA75

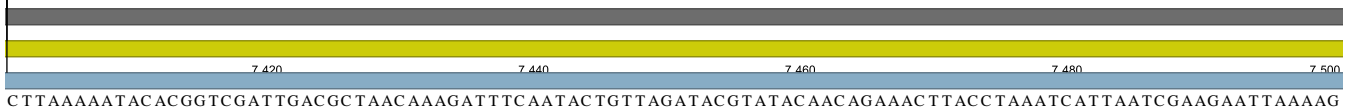

Fragment 1  
portal protein  
SA75

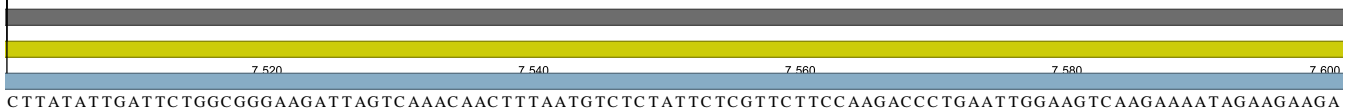

Fragment 1  
portal protein  
SA75

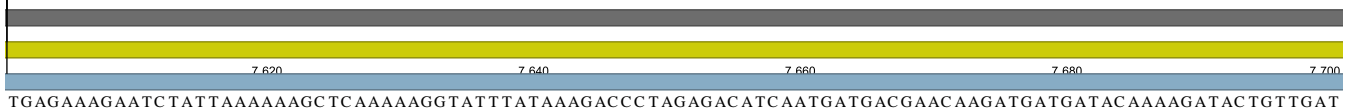

Fragment 1  
portal protein  
SA75

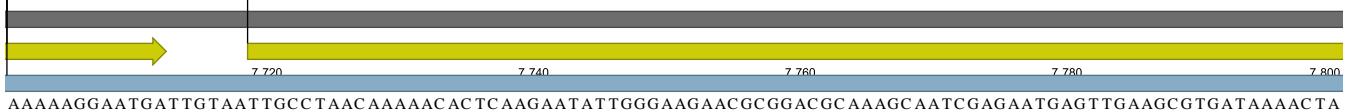

Fragment 1  
minor head protein  
SA75

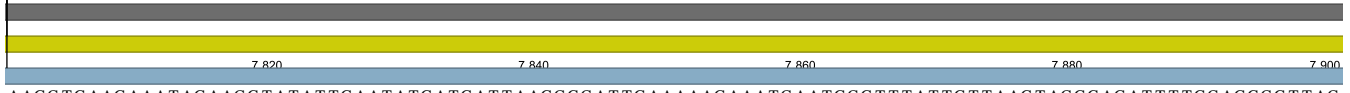

AAGCTGAAGAAATAGAACGTATATGAATATGATGATTAAGCGCATTGAAAAAGAAATCAATGCGTTATTGTTAAGTACGGAGATTTTGCAGGCGTTAC

Fragment 1  
minor head protein  
SA75

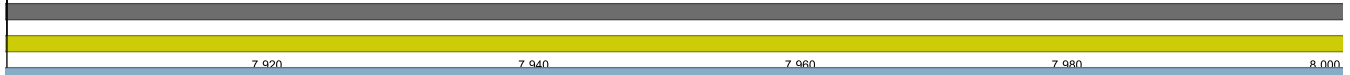

ATTACAAGAAGCACAAAAGATTATTGATGAGTTCGATGTAAAAGCGTTCAAGAAGAAGCAAAAAGATTGGTCGAAAAC AAGGAC TTTAGCGATAGAGCA

Fragment 1  
minor head protein  
SA75

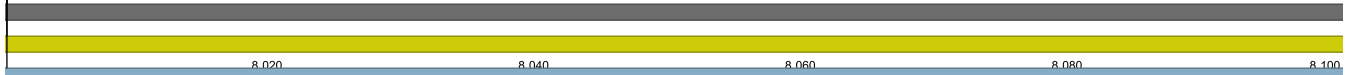

AATGAAGAATTAAGAAGTATAACACTAAGATGTATGTATCTAGAGAACAGATGTTAAAGATTC AAATAGAAATCTTAAATTGCTTATGCAACAGCTCAA

Fragment 1  
minor head protein  
SA75

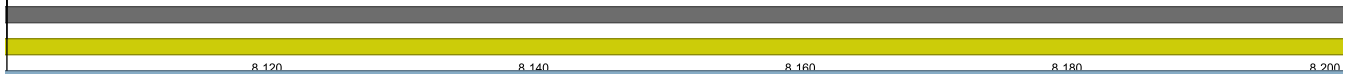

CAGAATTATCGATGAGGGAATATTTCAATCAACAGCTTATCGTGTGTTTCAGTGATCAAGCGGTTATTTAGGTGAAGGTGTAC AAGTAGCTAAAGAAGT

Fragment 1  
minor head protein  
SA75

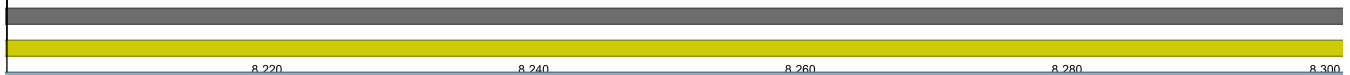

TATAGATACAATCGTTGATACACAATTTTCATGGTGTGCTTTGGTCAGAGCGATTATGGACTAATAC TGAAGCGATGAAACAAGAAAGTAGAAGAAAT AATT

Fragment 1  
minor head protein  
SA75

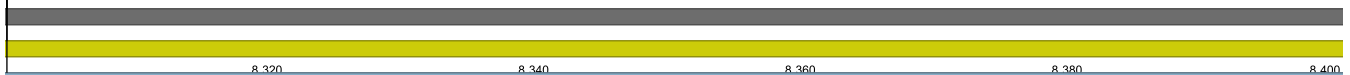

GCTAATGTGGTTATTAGAGGTCGACATCCAAATGAATATGTTAAAGATATGCGCAAGCACCTAAACAATTCGAAGGCACAGCACGACAAAAGACCCGAC

Fragment 1  
minor head protein  
SA75

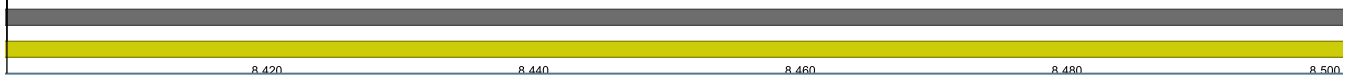

CAATTAATCATTGCTTTATACGGAATCGGCACGTGTTACGCACAATCAAGCATTGACAGCATGAAAGAAATTTACCGGAAGGATATTATATGTATAT

Fragment 1  
minor head protein  
SA75

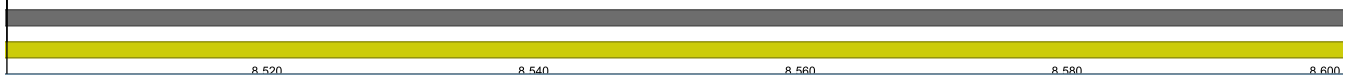

TGCAAAAATCGATAATAGAACAAC TAAAGTATGTAAAGGGCTTAAACGGAGAAATATTC AAAGTTAAAGACGCTAAAATGGTGTTAATTTCTACCC TATG

Fragment 1  
minor head protein  
SA75

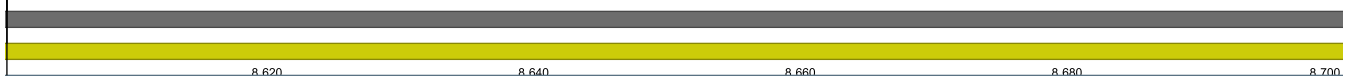

CATATCAATTGTCGTTTCAGATTGTGCATTACTACCTAAATCTATGTGGCCGAAAAAACCAAAAACGACAAACAAAATAC TTTGGAGGAAAAGTGA

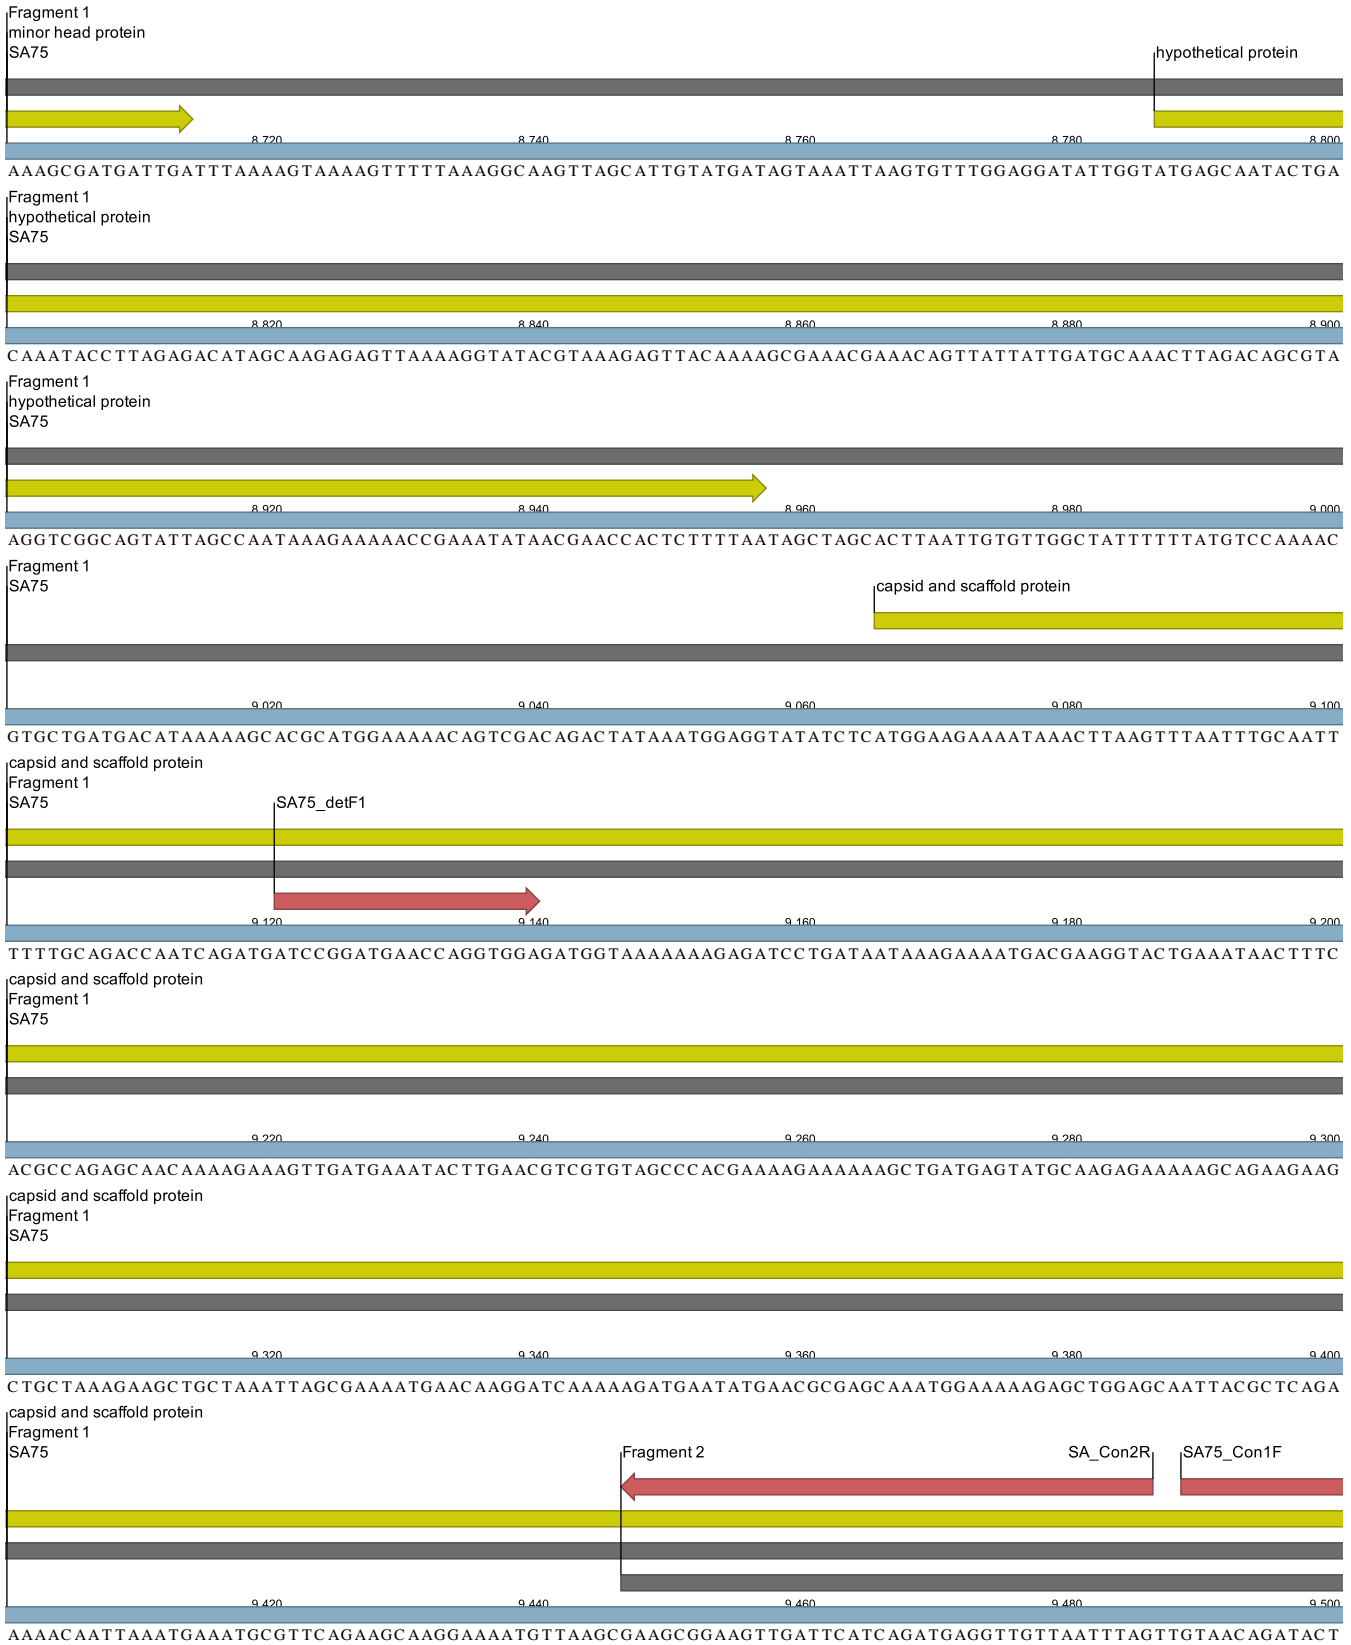

SA75\_Con1F  
capsid and scaffold protein  
Fragment 1  
Fragment 2  
SA75

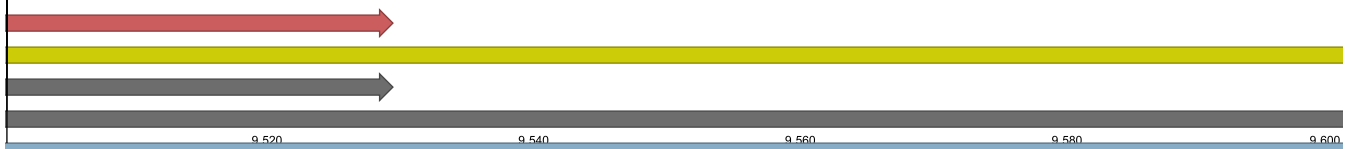

GCTGAACAAACTAAATTGAATGTTGAAGCTTTTTCTAATGCAGTAAAAAAGCGGTTAATGAAGCGGTTAAGGTTAACGCTAGACAAATCGCCATTAAGT

capsid and scaffold protein  
Fragment 2  
SA75

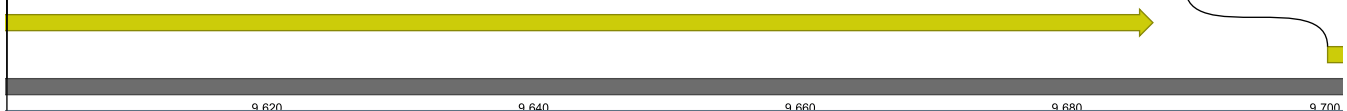

GTGGAGATTCATTTAATCACTCATCTAAAAACAAACAAACAAACTTAGCTGAAATAGCTAGACAAAAAGAATTATTTAAAAATT AACGGAGGCATTTAAA

major capsid protein  
Fragment 2  
SA75

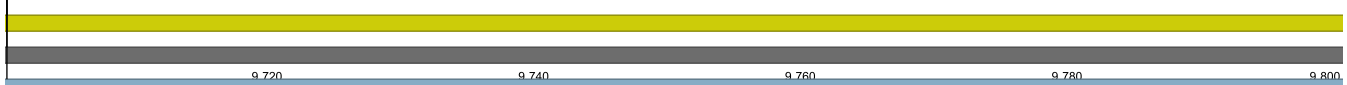

TGGAACAAACACAAAAATTTAAATTTAAATTTGCAACATTTTGCAGTAACAATGTTAAACCGCAAGTATTTAACCTGATAATGTAATGATGCACGAAAA

major capsid protein  
Fragment 2  
SA75

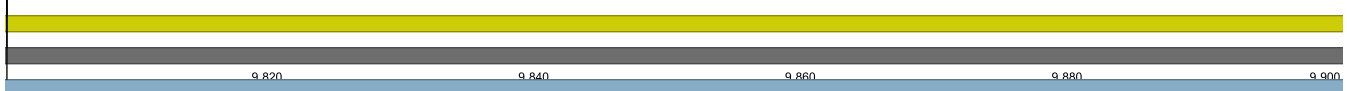

GAAAGATGGCACGTTGATGAATGAATTCAC AACGCCCATCTTACAAGAGGTTATGGAAAACCTAAAAATTATGCAATTAGGTAAGTACGAACCAATGGAA

major capsid protein  
Fragment 2  
SA75

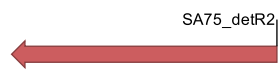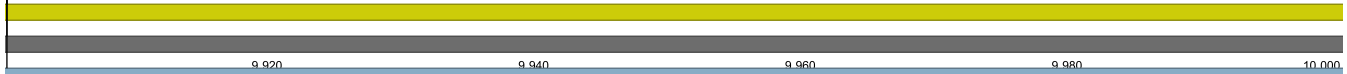

GGTACTGAGAAGAAGTTTACTTTTTGGGCTGATAAACAGGTGCTTACTGGGTAGGTGAGGGTCAAAAAATTGAAACGCTAAGGCTACTTGGGTTAATG

major capsid protein  
Fragment 2  
SA75

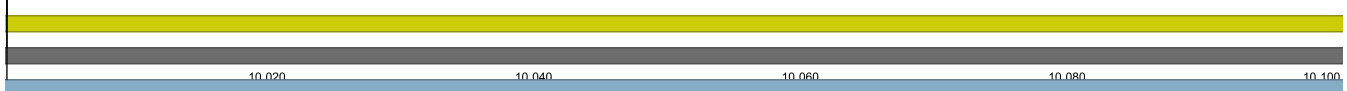

CTACTATGAGAGCGTTTTAAATTAGGGGTTATCTTACC TGTAACAAAAGAAATTTTGAATTACACTTATTCAC AATCTTTGAAGAAATGAAGCCTATGAT

major capsid protein  
Fragment 2  
SA75

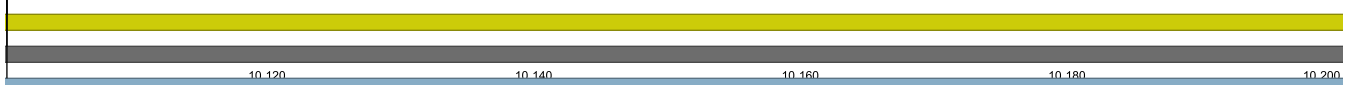

TGCTGAAGCATTCATAAAAAGTTTGATGAAGCGGTTATTTGAATCAAGGTAACAATCCATTCGGTAAATCAATGTCACAATCAATTGAAAAAAC TAAT

major capsid protein  
Fragment 2  
SA75

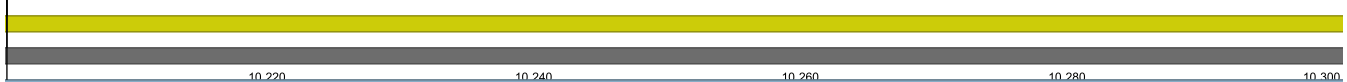

AAGGTTATTAAGGTGACTTCACACAAGATAACATTATTGATTTAGAGGCATTACTTGAAGATGACGAATTAGAAGCAAAATGCGTTTATCTCAAAAACAC

major capsid protein  
Fragment 2  
SA75

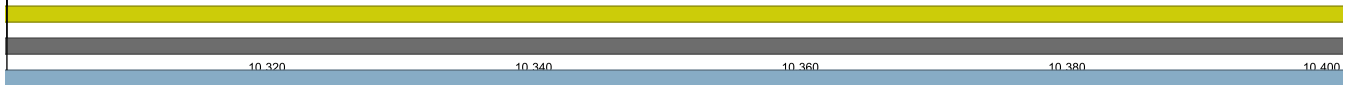

AAAACAGAAGCTTGTTACGTAAAATGTAGATCCTGAACTAAGGAACGATTTATGACCGTAACAGTGATACGTTAGATGGTCTACCTGTGGTTAACTT

major capsid protein  
Fragment 2  
SA75

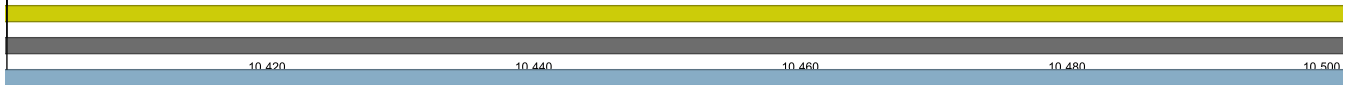

TAAATCAAGCAATTTAAAACGCGGTGAATTAATTACTGGTGACTTTGTAAAGTTGATTTACGGTATCCCTCAATTAATTGAATACAAAATCGATGAACTT

major capsid protein  
Fragment 2  
SA75

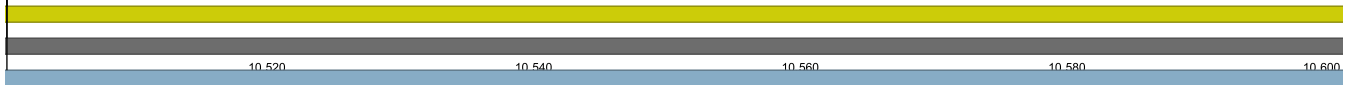

GCACAATTATCTACAGTTAAAACGAAGATGGCACACCTGTAAACTTATTCGAACAGACATGGTGGCATTGCGTGCAACTATGCATGTAGCGTTACACA

major capsid protein  
Fragment 2  
SA75

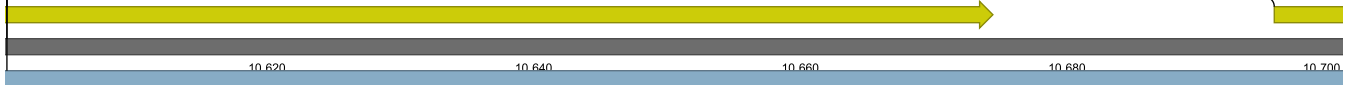

TCGCTGACGATAAAGCATTCGCTAAATTAGTGCTGCTGACAAAAAACAGATTCAGTACCAGGAGAAGTTTAAATAAATAATTAGGAGTGGTAACATGCC

hypothetical protein  
Fragment 2  
SA75

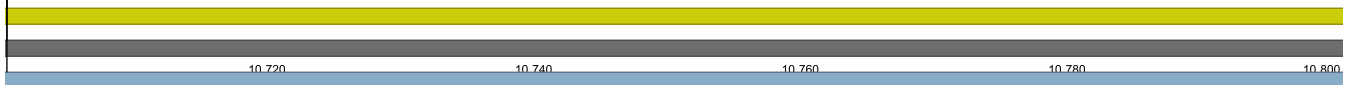

CGAAATCATTGGAATTGTTAAAGTAGATTTACAGATTTAGAAGATAACAGACATGTCTATATGAAAGGGCATGTCTACCCTCGCAAAGGTTATGATCCTT

hypothetical protein  
Fragment 2  
SA75

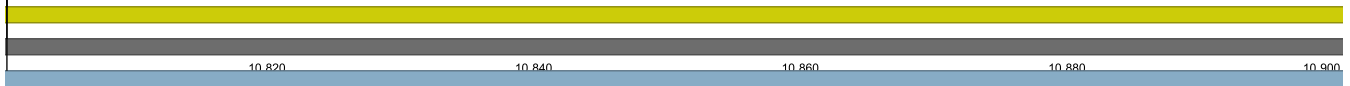

ACAGATGAACGTATCAAAGCTTTAGCTAGTGTGAAAATAAACGCAACGAACAAATGATTTACATTGTAATGACAAATTAACCAAAAAAGAAC TTGTCC

hypothetical protein  
Fragment 2  
SA75

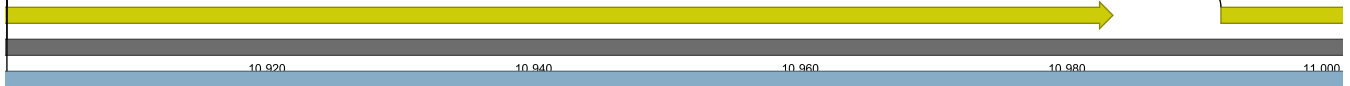

AAATAGCAAGTGTGCTGGCTTAC AAGTTGATGAAAAACAAACAAAAGCTGAAATATCAATGCTTTTGAGTCACTAGAGTAGGTGGTTATATGACTACG

hypothetical protein  
Fragment 2  
SA75

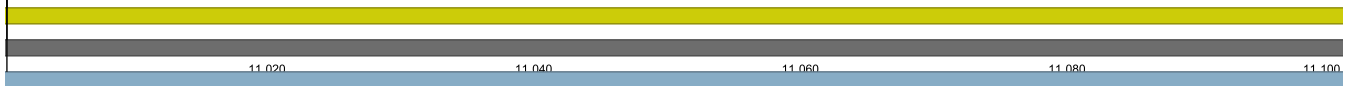

CTAGCTGATGTAAAAAACGTATTGGTCTTAAAGATGAAAAGCAAGATGAACAATTAGAAGAAATCATAAAAAGTTGTGAAAAGCCAGTTGTTATCAATGT

hypothetical protein  
Fragment 2  
SA75

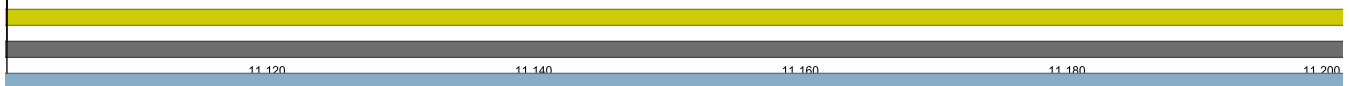

TACCTATTGAAGTTGAACAAATACCGAAAGGTTTAGTTACATGATTAAGAAGTTGCAGTTAAACGCTACAACAGGATTTGGTGC TGAAGGTATGACATC



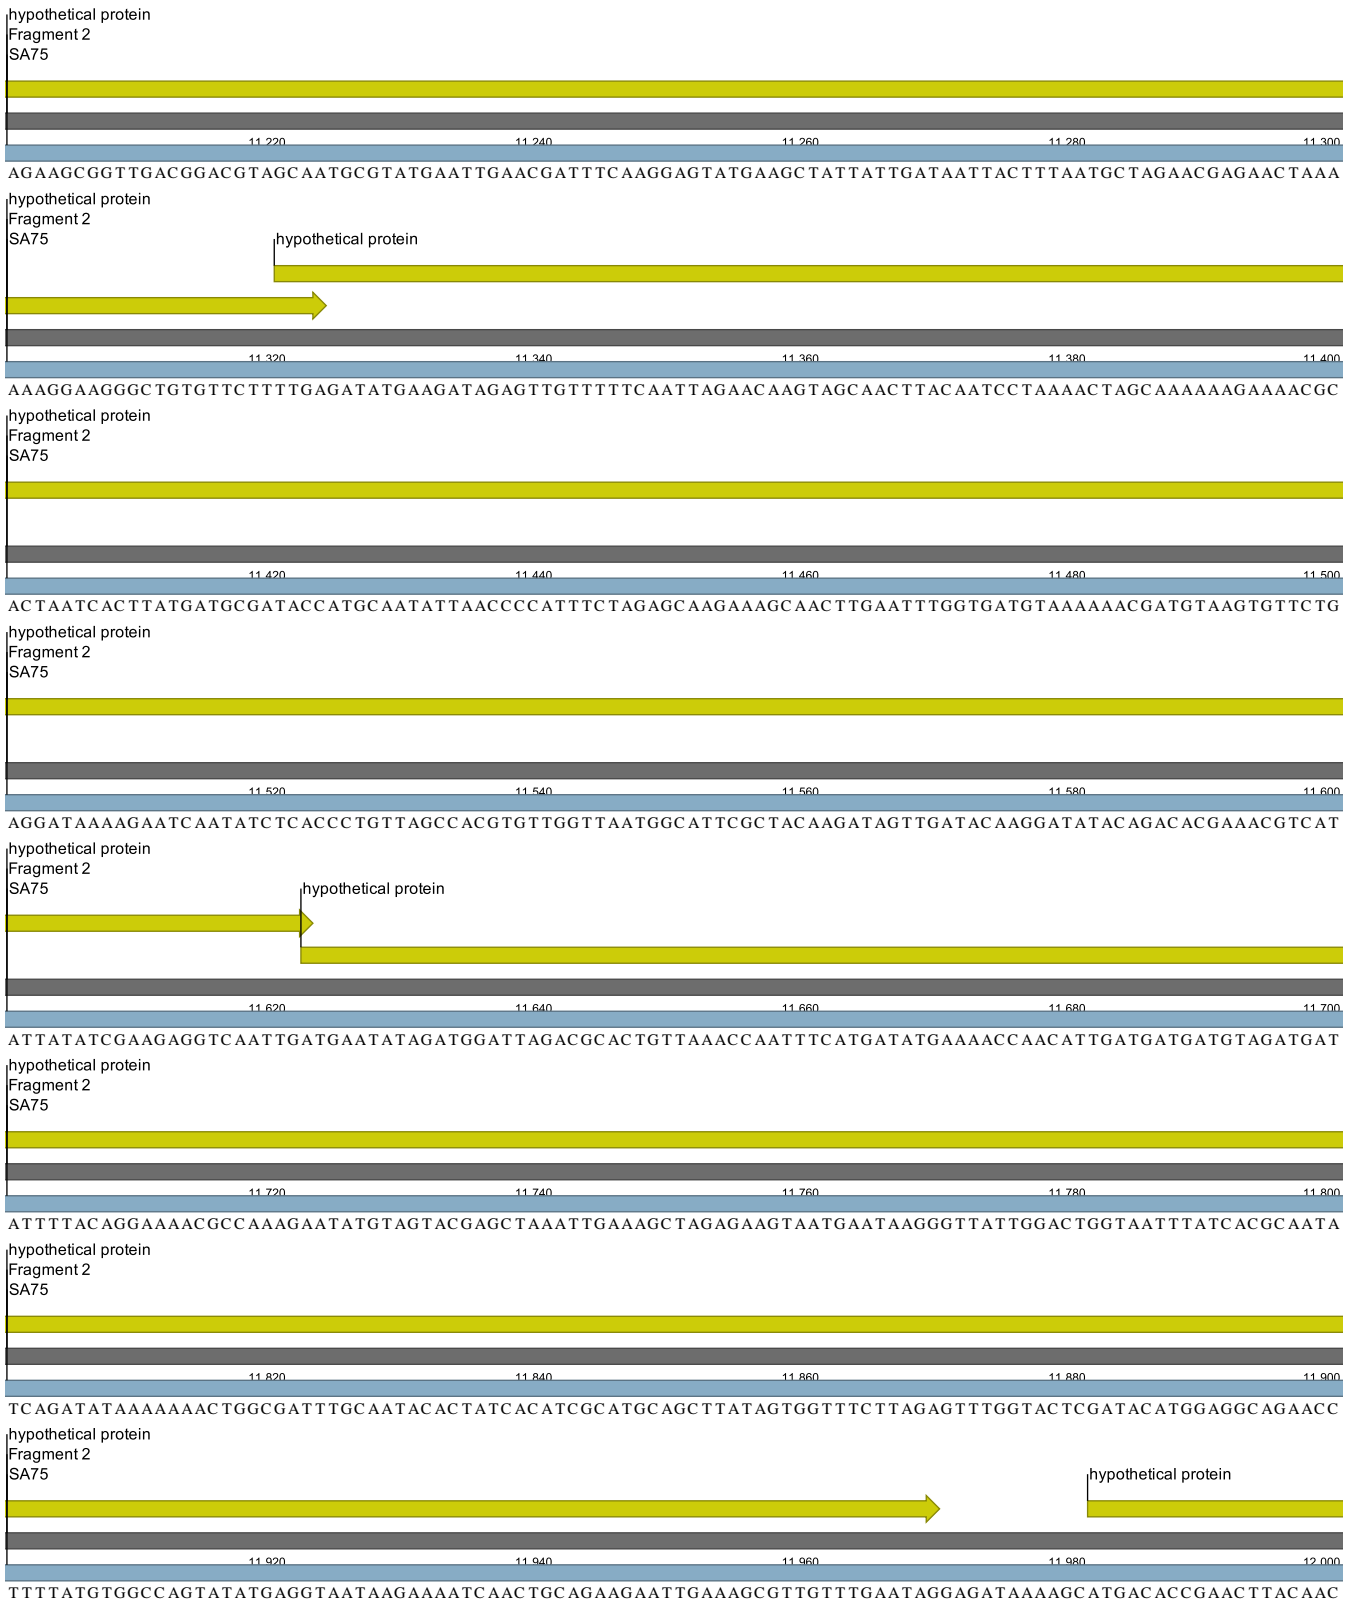

hypothetical protein  
Fragment 2  
SA75

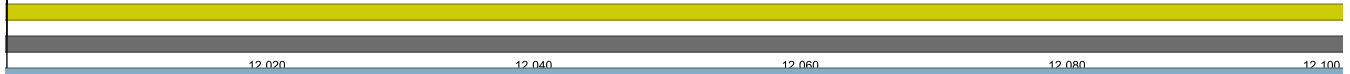

TTTATAATAAAGCGTATGAAACGC TACAAGGATATGGATTCCTGTTATTTCTCGTAAAGAGATGC AAC AAGAGATTCGATCC TTTTTTGTAAATAAA

hypothetical protein  
Fragment 2  
SA75

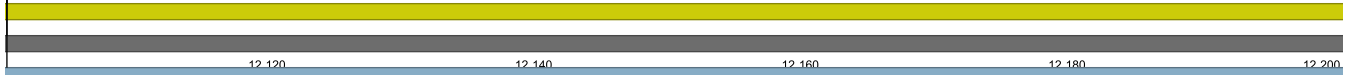

AATGCCGGAGTCAAAATAGAAGTAAGTACACGTTTGATAGTTATCTGGCGATACGAATTTAGTTATTGATATTGGAGTGTAAGCGATGATTTAGGACAT

hypothetical protein  
Fragment 2  
SA75

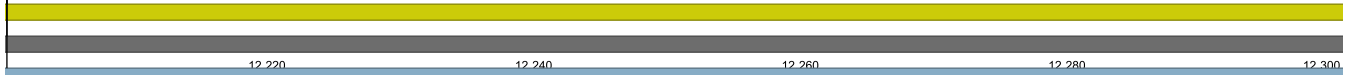

CATGACGGACTTGTTAAAAGGTGTATCGATGATTTAACACCTAGCGTTAAAACAAACGATTATGAC TTTGAAGAAGATGATACTAACATCGCACAGTTAG

hypothetical protein  
Fragment 2  
SA75

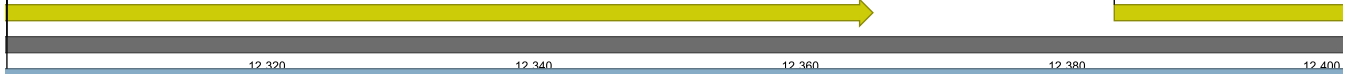

TCGATGATAC TACTAATCAAGAATTGCTACACACATCAATAACGATATCTTACAAAACATTTTAAAAAACGGAGGAATATTAATGGCGAATATGAAAAA

hypothetical protein  
Fragment 2  
SA75

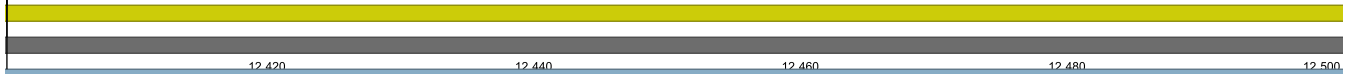

TAGTAATGACCGTATTATTTGTTTAGAAAAGCTGGCGAAAAAGTAGATGCTACTAAAATGCTTTTTTTAAC TGAATACGGCTTATCACATGAAGCTGAT

hypothetical protein  
Fragment 2  
SA75

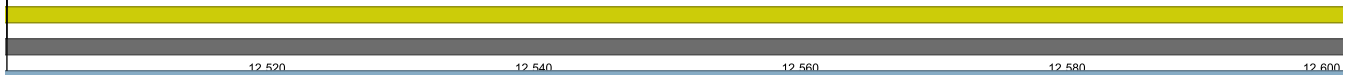

ACAGATACAGAGGATACGATGGATGGGTC TTATAACACTGGTGGTTCAGTTGAATCAAC AATGTC TGGTACTGCTAAAATGTTTTATGGTGACGATTTTG

hypothetical protein  
Fragment 2  
SA75

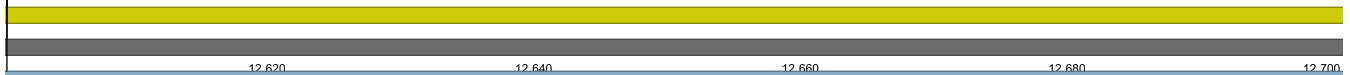

CAGATGAAATTGAAGATGCAGTTGTAGATCGCGTATTGTATGAGGCTTGGGAAGTTGAAAGTAGAATACCAGGCAAAAATGGAGATGCTACTAAAATTTAA

hypothetical protein  
Fragment 2  
SA75

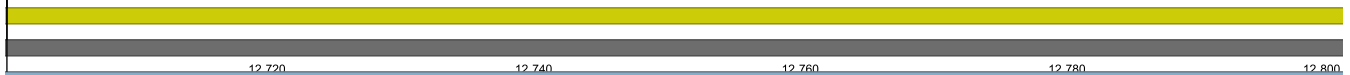

AGCGAAATATTTCCAAGGTTTCCACAATAAATTTGAATTA AAAAGCAGAAGCTAACGGTATTGATGAATATGAATATGAATATGGAGTGAATGGTCGTTTC

hypothetical protein  
Fragment 2  
SA75

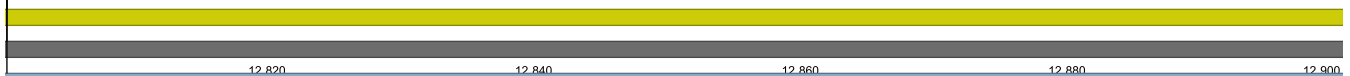

CAACGTGGATTGCAACACTACC TGAGGCTGTAAC AAAGAACTTAAGGCGACTGGATACAGATTCCATGACACTACAAAAGCAGATGCGTTAAC TGGCG

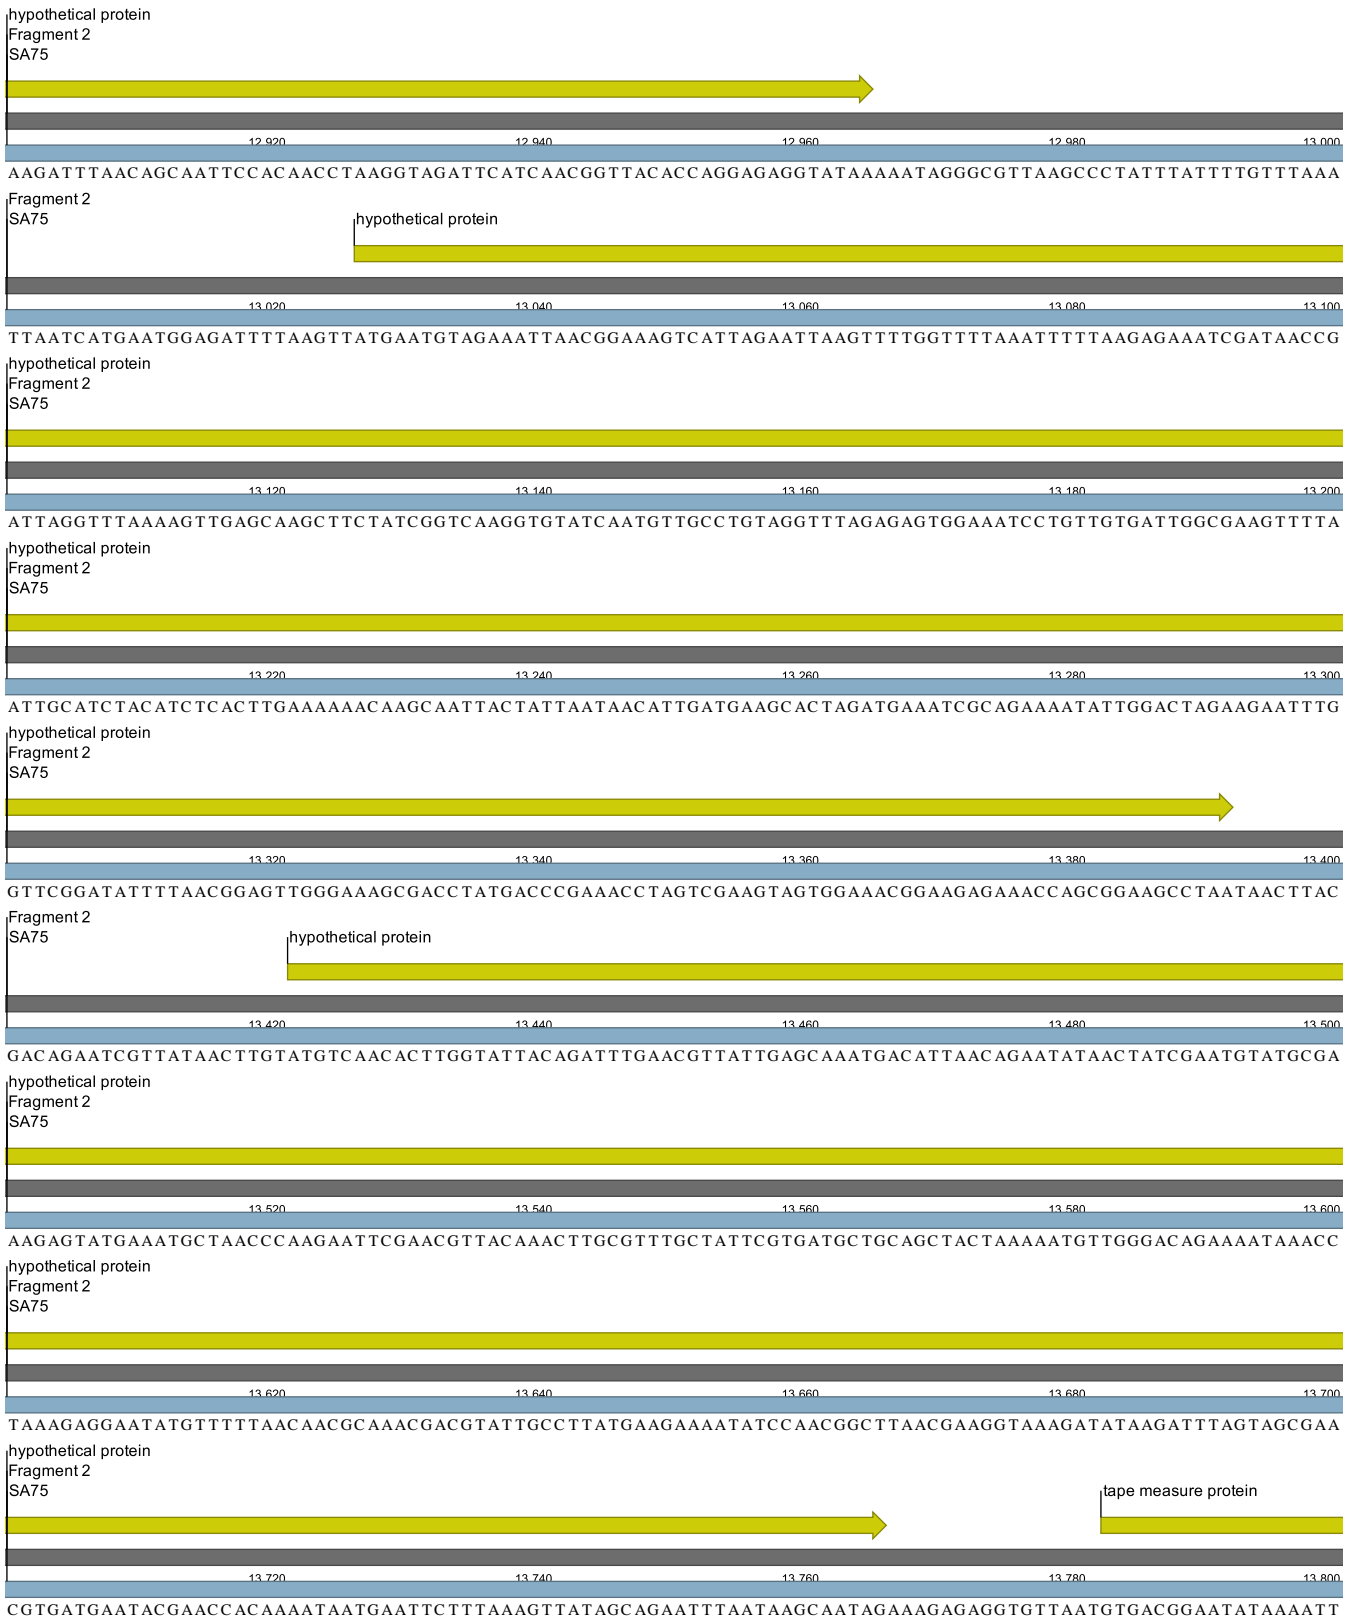

tape measure protein  
Fragment 2  
SA75

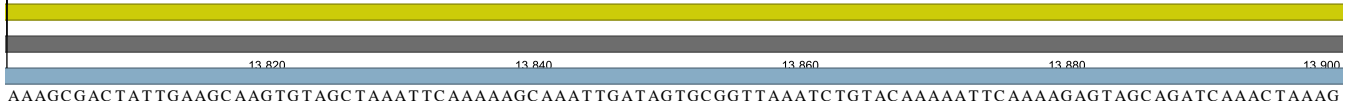

AAAGCGACTATTGAAGCAAGTGTAGCTAAATTCAAAAAGCAAATTGATAGTGCGGTTAAATCTGTACAAAAATTCAAAAGAGTAGCAGATCAAAC TAAAG

tape measure protein  
Fragment 2  
SA75

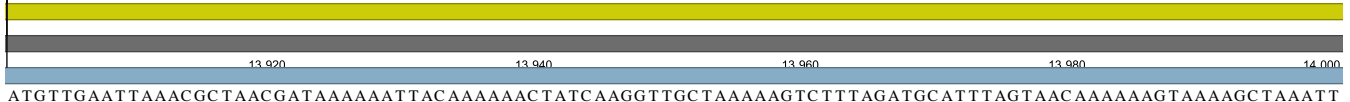

ATGTTGAATTAAACGCTAACGATAAAAAATTACAAAAAATATCAAGGTTGCTAAAAAGCTTTTAGATGCATTTAGTAACAAAAAAGTAAAAGCTAAATT

tape measure protein  
Fragment 2  
SA75

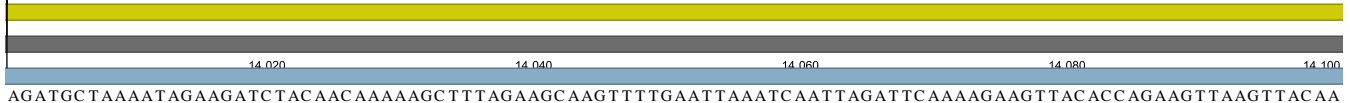

AGATGCTAAAATAGAAGATCTACAACAAAAAGCTTTAGAAGCAAGTTTTGAATTAATCAATTAGATTCAAAAGAAGTTACACCAGAAGTTAAGTTACAA

tape measure protein  
Fragment 2  
SA75

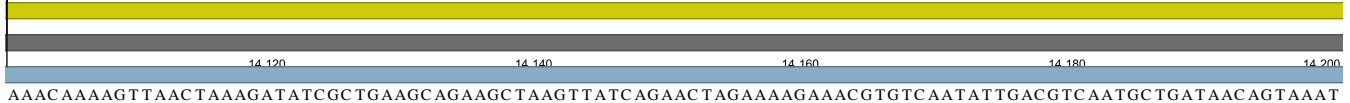

AAACAAAAGTTAACTAAAGATATCGCTGAAGCAGAAGCTAAGTTATCAGAACTAGAAAAGAAACGTGTC AATATTGACGTC AATGCTGATAACAGTAAAT

tape measure protein  
Fragment 2  
SA75

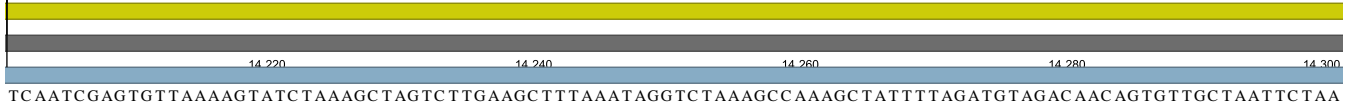

TC AATCGAGTGTTAAAAGTATCTAAAGCTAGTCTTGAAGCTTTAAATAGGTCTAAAGCCAAAGCTATTTTAGATGTAGACAACAGTGTGCTAATTC TAA

tape measure protein  
Fragment 2  
SA75

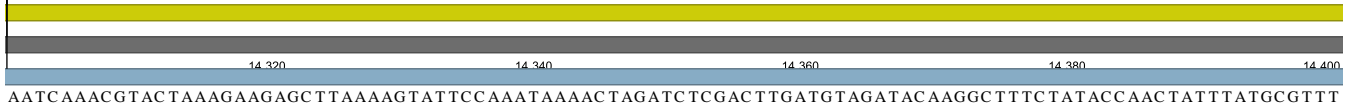

AATCAAACGTACTAAAGAAGAGCTTAAAAGTATTCGAAATAAACTAGATCTCGACTTGATGTAGATACAAGGCTTTC TATACCAACTATTTATGCGTTT

tape measure protein  
Fragment 2  
SA75

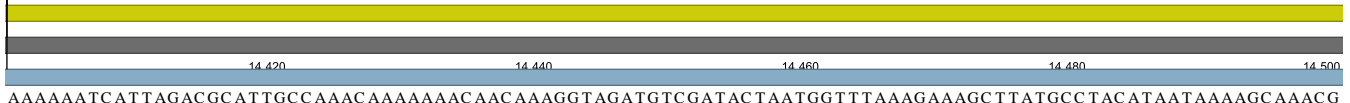

AAAAAATCATTAGACGCATTGCCAAACAAAAAACAACAAAGGTAGATGTCGATACTAATGGTTTTAAAGAAAGCTTATGCC TACATAATAAAAGCAAACG

tape measure protein  
Fragment 2  
SA75

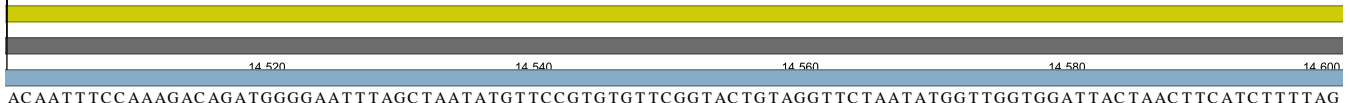

ACAATTTCCAAAAGACAGATGGGGAATTTAGCTAATATGTTCCGTGTGTTCCGGTACTGTAGGTTCTAATATGGTTGGTGGATTACTAACTTCATCTTTTAG

tape measure protein  
Fragment 2  
SA75

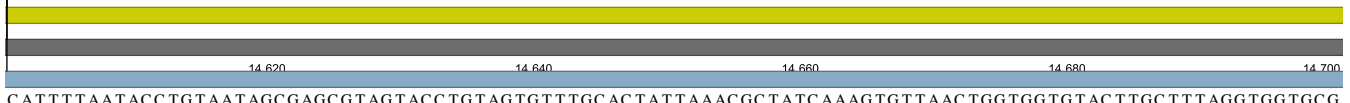

CATTTTAATACCTGTAATAGCGAGCGTAGTACCTGTAGTGTTCACATATTAACGCTATCAAAGTGTTAAC TGGTGGTG TACTTGC TTTAGGTGGTGCG

tape measure protein  
Fragment 2  
SA75

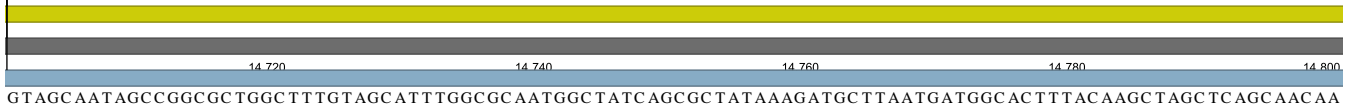

tape measure protein  
Fragment 2  
SA75

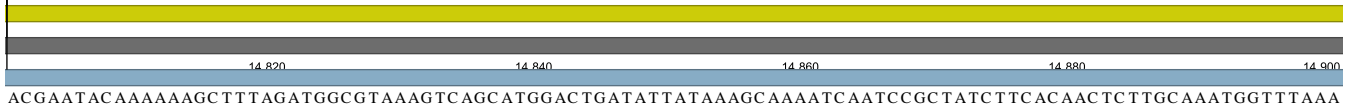

tape measure protein  
Fragment 2  
SA75

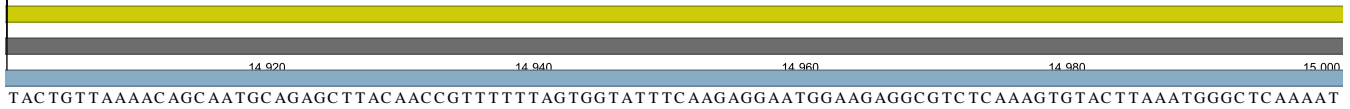

tape measure protein  
Fragment 2  
SA75

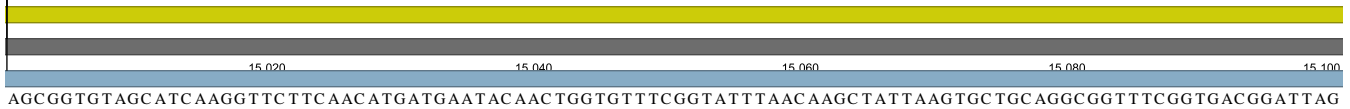

tape measure protein  
Fragment 2  
SA75

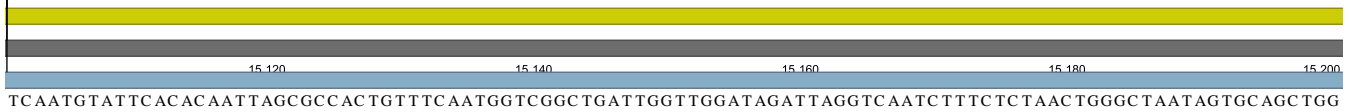

tape measure protein  
Fragment 2  
SA75

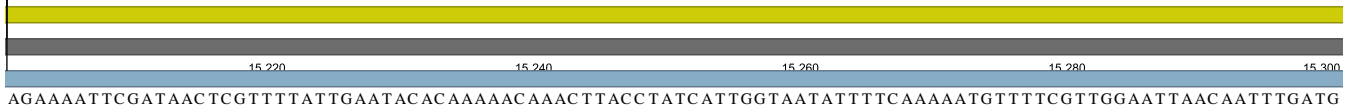

tape measure protein  
Fragment 2  
SA75

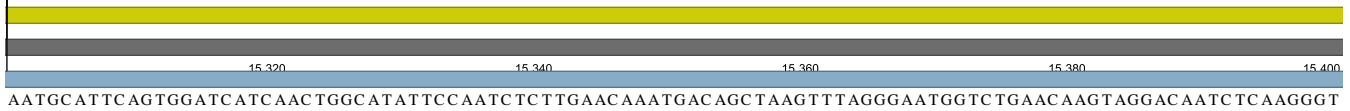

tape measure protein  
Fragment 2  
SA75

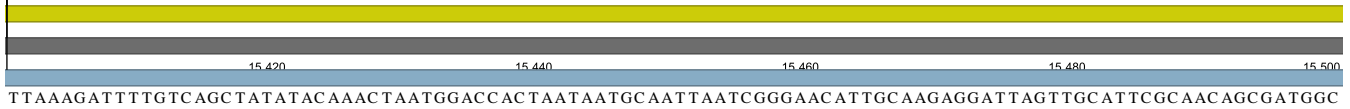

tape measure protein  
Fragment 2  
SA75

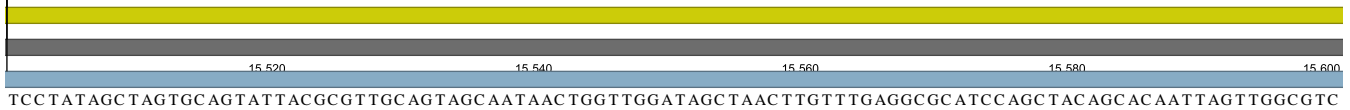

tape measure protein  
Fragment 2  
SA75

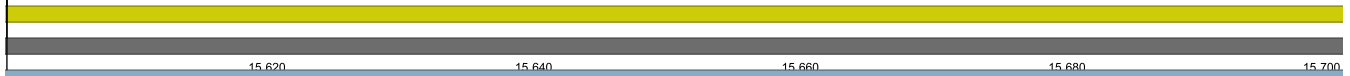

ATTATAACTTTAGTTGGTGCATTTAGATTTTAAATTGCTCCAATATTAGCGGTAATGGATTTTCTGGGGCCATTAGCAGCAAGATTAGTCGCATTAGTAA

tape measure protein  
Fragment 2  
SA75

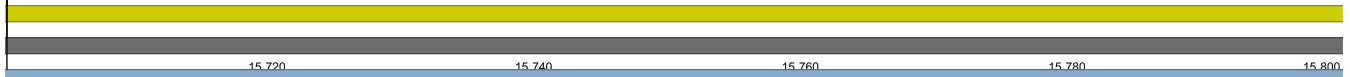

CTAAGTTTGGTTGGGCTAAAACAGGAACTTTAGTATTAAAGTAAGGCAATGACATCATTAAAAGGTCCAATAAAATTAGTTACAGCTATATTCCAATTGTT

tape measure protein  
Fragment 2  
SA75

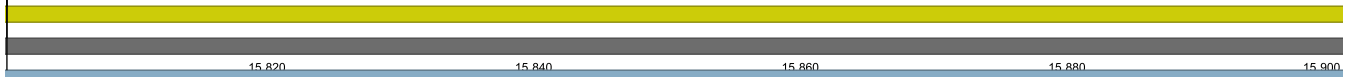

ATTCGGTAAGATTGGATTAATTAGAAATGCTATCACAGGACTAGTAAC TGTGTTTGGTATTTTAGGTGGTCCATAAAC AATAGTTATTGGTGTAATCGCT

tape measure protein  
Fragment 2  
SA75

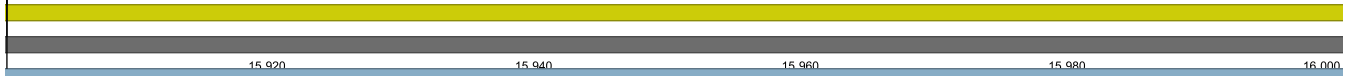

GCATTAATAGCTATATTCGTTTTATTTTGGAAATAAAATGAAGGATTCAGAAAC TTTATTATAAATGCTTGGAAATGCGATAAAAACGTTTATGGTTACAG

tape measure protein  
Fragment 2  
SA75

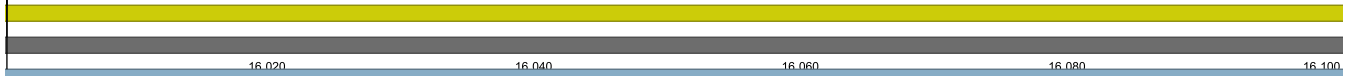

TTTGGAAATGTTGAAAAC TGTAGCATCGGTTGTATGGAATGCTATTTTAAAAGCTATCAC TACAGCAGTAAC TAATGTATACAATTTTATAATGATGTT

tape measure protein  
Fragment 2  
SA75

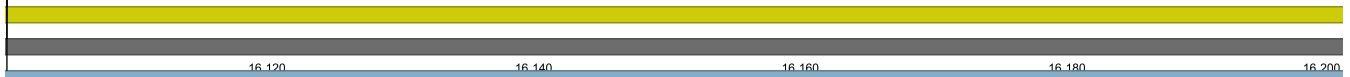

TTGGAATCAAAATAGTCGCTTATTTACAAGGGTTATGGAATGGAATTATCGCTATTGCAAC AACGGTGTGGAACCTTTTAGTTACAATCATCACAACTGTT

tape measure protein  
Fragment 2  
SA75

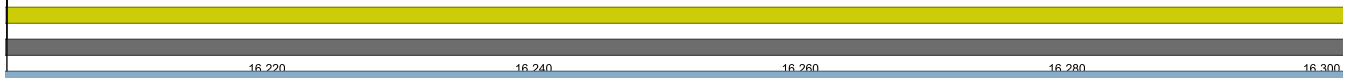

TTCACGACGATAATGAC AATAGTTATGACGATATGGACAGCTATTTGGACATTC TTAAGTACAATC TGGAAC ACGATAATTACAATCGCTACTACGATTT

tape measure protein  
Fragment 2  
SA75

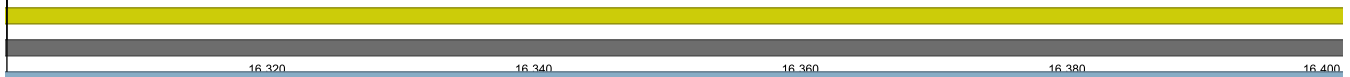

GGAATTTGTTAGTCACTGTAAATACTACAGTGTACCACAATTATGACTATCGCAATGACAATTTGGAACGCTATTTGGACGTTCTTACAACGTTGTG

tape measure protein  
Fragment 2  
SA75

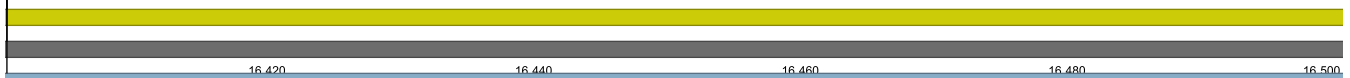

GAACACTATAGTTACTGTGGCAACTAAGGTTTGGAACGCTATCAC TACAGCTATATCTACTGCGTTACAAGCGGCATGGAGTTTTATTTC TAATATATGG

tape measure protein  
Fragment 2  
SA75

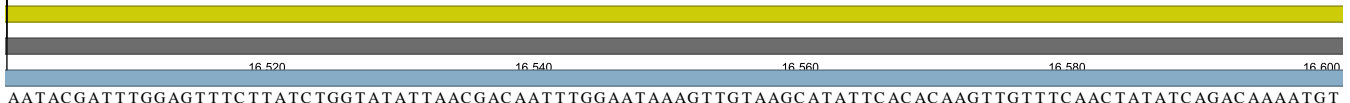

tape measure protein  
Fragment 2  
SA75

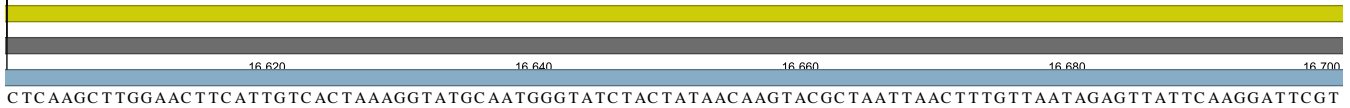

tape measure protein  
Fragment 2  
SA75

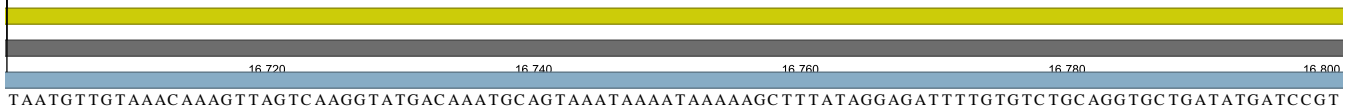

tape measure protein  
Fragment 2  
SA75

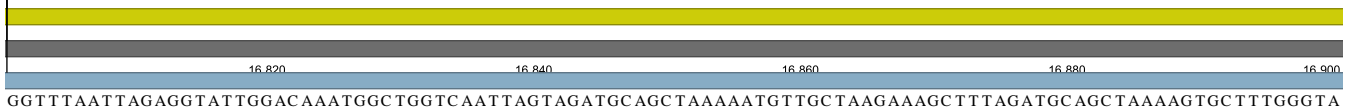

tape measure protein  
Fragment 2  
SA75

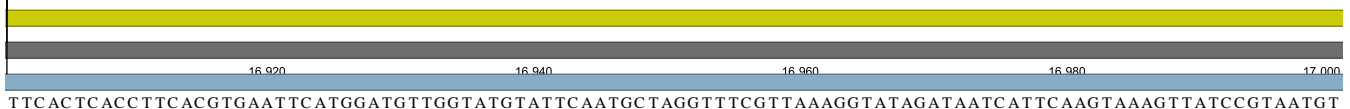

tape measure protein  
Fragment 2  
SA75

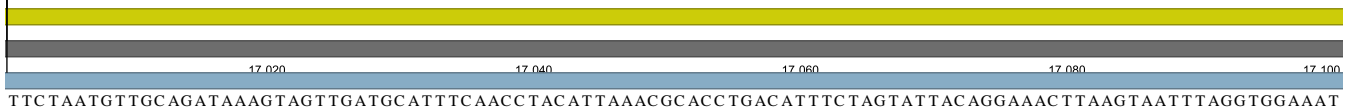

tape measure protein  
Fragment 2  
SA75

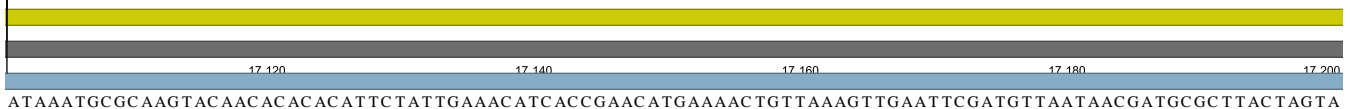

tape measure protein  
Fragment 2  
SA75

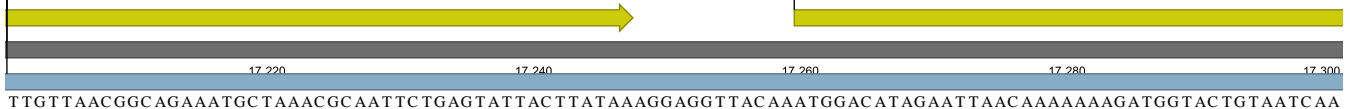

putative distal tail protein  
Fragment 2  
SA75

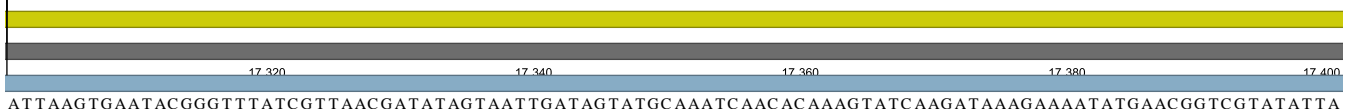

putative distal tail protein  
Fragment 2  
SA75

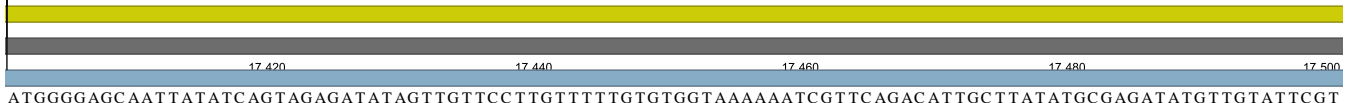

putative distal tail protein  
Fragment 2  
SA75

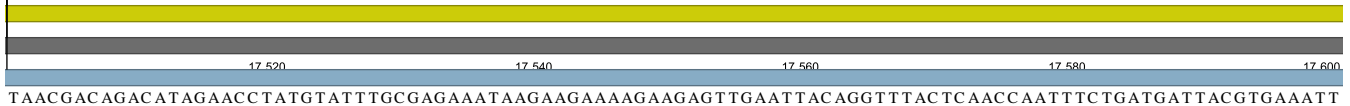

putative distal tail protein  
Fragment 2  
SA75

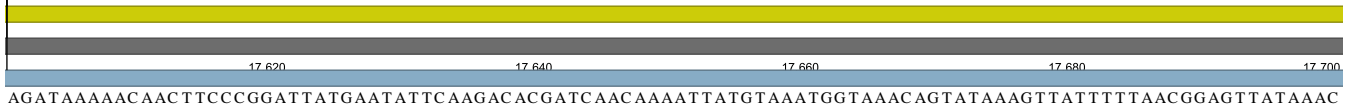

putative distal tail protein  
Fragment 2  
SA75

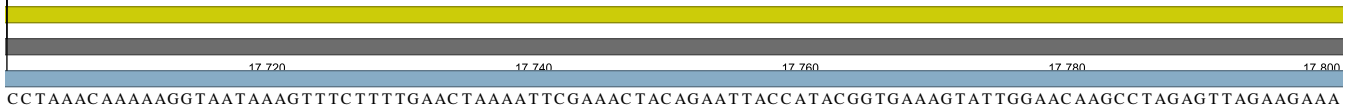

putative distal tail protein  
Fragment 2  
SA75

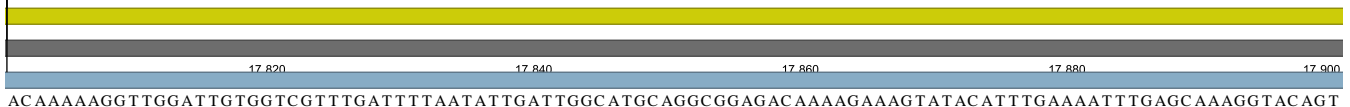

putative distal tail protein  
Fragment 2  
SA75

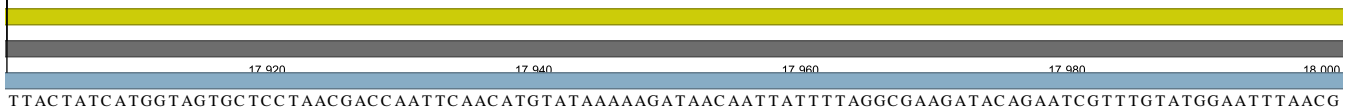

putative distal tail protein  
Fragment 2  
SA75

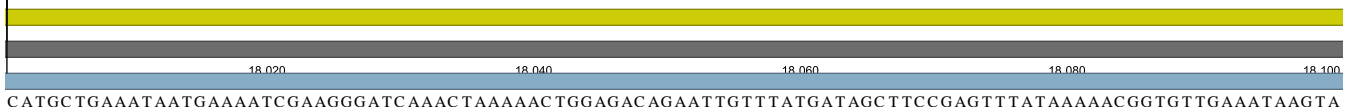

putative distal tail protein  
Fragment 2  
SA75

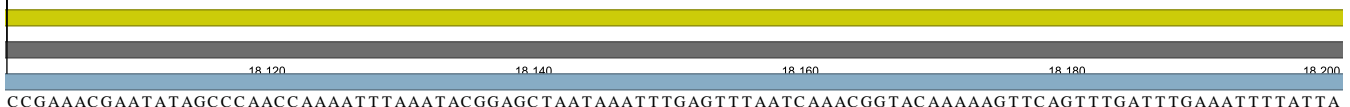

putative distal tail protein  
Fragment 2  
SA75

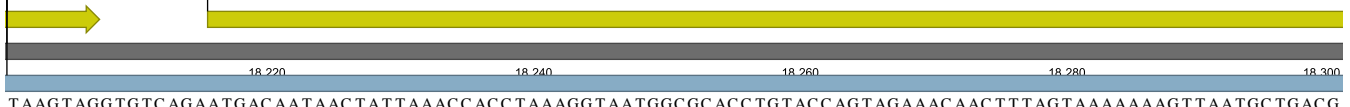



putative tail associated lysin  
Fragment 2  
SA75

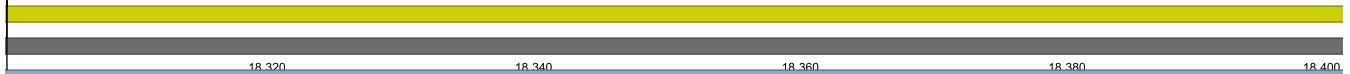

GTGTATTAAC TTTGATATCTAGAAAATAAATATAC TTATGAAGTTATTAACGC TATAGGGAAAAGATGGAT TGTTAGTCATGTCGAAGGTGAAAACGA

putative tail associated lysin  
Fragment 2  
SA75

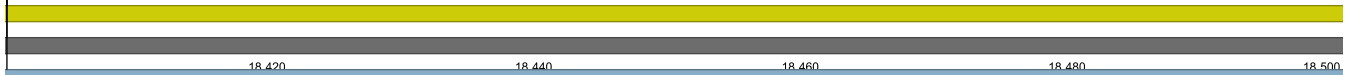

CAAGAAAGAATATGTAATAACTGTCATTGATAGGAAATCAGAAGGCGACAGACAAC TGGTTGAATGTACTGCTAGAGAGATTCC TATAGACAAGTTAATG

putative tail associated lysin  
Fragment 2  
SA75

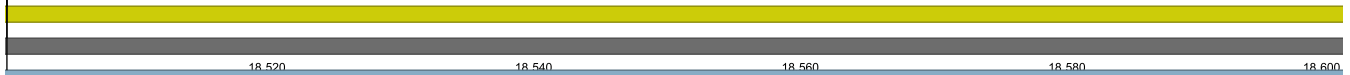

ATTGATAGGATTTATGTTAATGTAACAGGATCTTTTACAGTAGAAAGATATTTTAAACATTGTGTTTCAAGG TACTGGAATGC TTTTGAAGTCGAAGGTA

putative tail associated lysin  
Fragment 2  
SA75

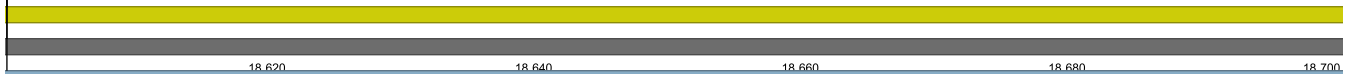

AGGTTAAGTCTTCGAAGTTGAAAATGGTGGTGAAGGCGACACAAGGTTAGAAATGTTTAAAAAGGGATTAGAACATTCGGTTTAGAATATAAAATAAC

putative tail associated lysin  
Fragment 2  
SA75

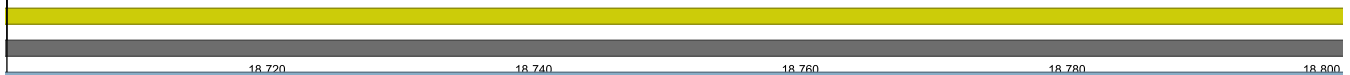

GTATGACAAAAGAAAGACAGATATAAGTTTGTATTGACGCC TTTTGC AAATCAAAAAGCGTCTTATTTTATTCTGACGAAGTCAACGCCAACGCTATA

putative tail associated lysin  
Fragment 2  
SA75

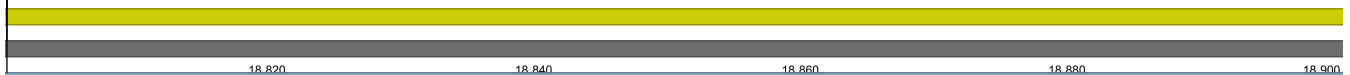

AAACTTGAAGAAGATGCAAGTAATTCGCCACCTTCATTAGAGGTTACGGGAGTTATTCAGGCGAAGAAACATTCGAACACGCCGGGCTCGTAATGGAAAG

putative tail associated lysin  
Fragment 2  
SA75

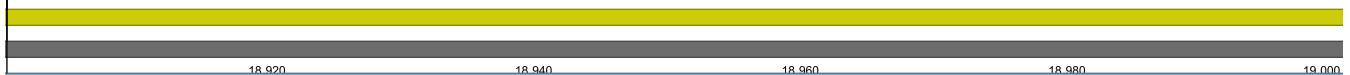

CTAGAAGTGCAATTAGCTGAGATATACGGTGATATCCACGCAGAACCATTTAAAGATGGTAAAGTGACTGACC AAGAACTATGGATAAAGAATTGCAATC

putative tail associated lysin  
Fragment 2  
SA75

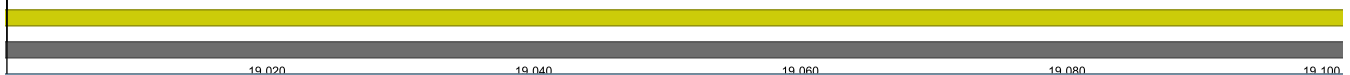

AAGATTGAAAAGGTCATTAACAACATCTTTGCTTTTGACTTTTGGTGTAAAGAGAAGCTTATCC TGAAGCAGACCCACAACCCGGTGACATAGTACAA

putative tail associated lysin  
Fragment 2  
SA75

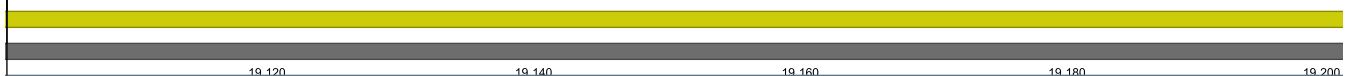

GTA AATCTACTATTTTAGGACTTAACGACCTAGTACGTATAGTAGAGATCAAACTATTAGAGATATAAAC AATGTAATTGTTAAGCAAGACGTAACAC

putative tail associated lysin  
Fragment 2  
SA75

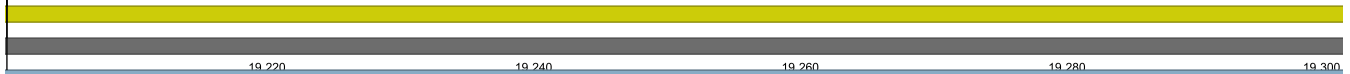

TTGGTGAATTC AATAGAGAAC AACGATATATGAAAAAAGTTA AACTGCAGCTAAC TATGTTTCTGGATTA AACGATGTTAATCTTCTAATCCTAGTAA

putative tail associated lysin  
Fragment 2  
SA75

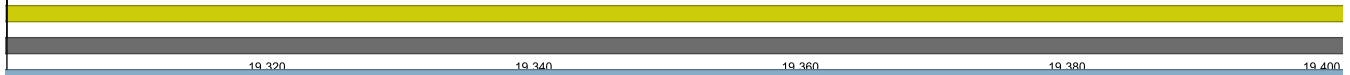

AGCGGCAGAAAAC TTGAAGTCTAAAGTAGCGTCAATAGCTAAATCAACACTCGATTTGTATGAGTAGAAC TGATTTGATTGAAGATAAACAGCAGAAAAGT

putative tail associated lysin  
Fragment 2  
SA75

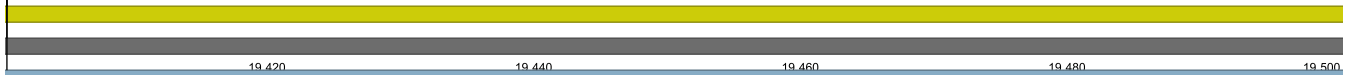

AGCTCTAAAAC TGTAAC TACATCTGACGGC ACTATTGTTTCATGATTTTATAGATAAATCAAACATTAAAGATGTAAAAACAATTGGAACGATTGGCGATT

putative tail associated lysin  
Fragment 2  
SA75

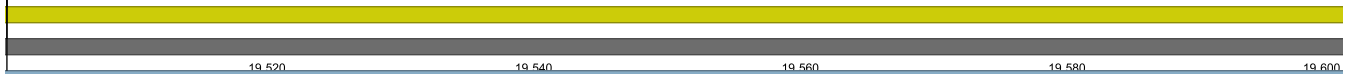

CTGTAGCTAGAGGGTCGCACGCAAAAAC TAATTTACAGAAATGTTAGGCAAGAAGTTAAAAGCTAAAACGACCAACCTTGC AAGGGTGGCGCTACAAT

putative tail associated lysin  
Fragment 2  
SA75

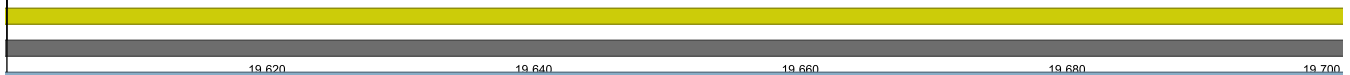

GGCGACAGTCCCTATAGGAAATGATGCAGTTGAAAATAGTATATATCGTCAAGCTGAACAAATAAAAGGAGACTTGATTATCGTTCAAGGTACTGATGAT

putative tail associated lysin  
Fragment 2  
SA75

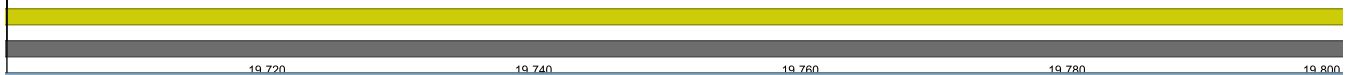

GACTGGTTACACGGTTATTGGGCAGGTGTACCTATAGGCAC TGATAAACGGATACTAAAAC TTTTACGGTGCC TTTTGTTCGCAATTGAAATTATTA

putative tail associated lysin  
Fragment 2  
SA75

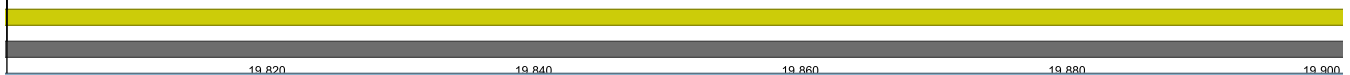

GAAAGAATAATCCGGACTCAAAAATACTAGTGATGACAGCTAC AAGACAATGTCC TATGGATGGC ACTAAAATACGCCG TAAAGACACGGATAAAAAATAA

putative tail associated lysin  
Fragment 2  
SA75

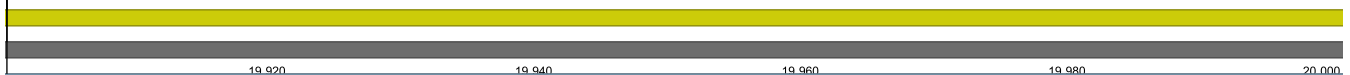

ATTAGGGTTAACACTTGAAGACTATGTAATGCTCAAGTTTGGCTTGCAGTGAATTAGACGTGCC TGTATATGATGCATATCATACAGACTATTTCAA

putative tail associated lysin  
Fragment 2  
SA75

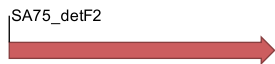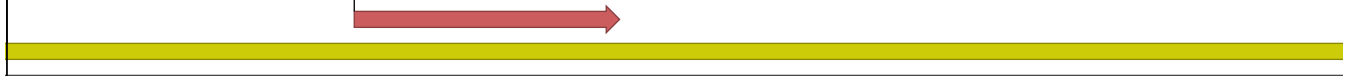

CCTTATAATCC TGCATTTAGAAAATCCAGCATGCC TGACGGTTACATCCGAATGAACGAGGTCATGAAGTTATTATGATGAAC TTATTA AAAATTATT

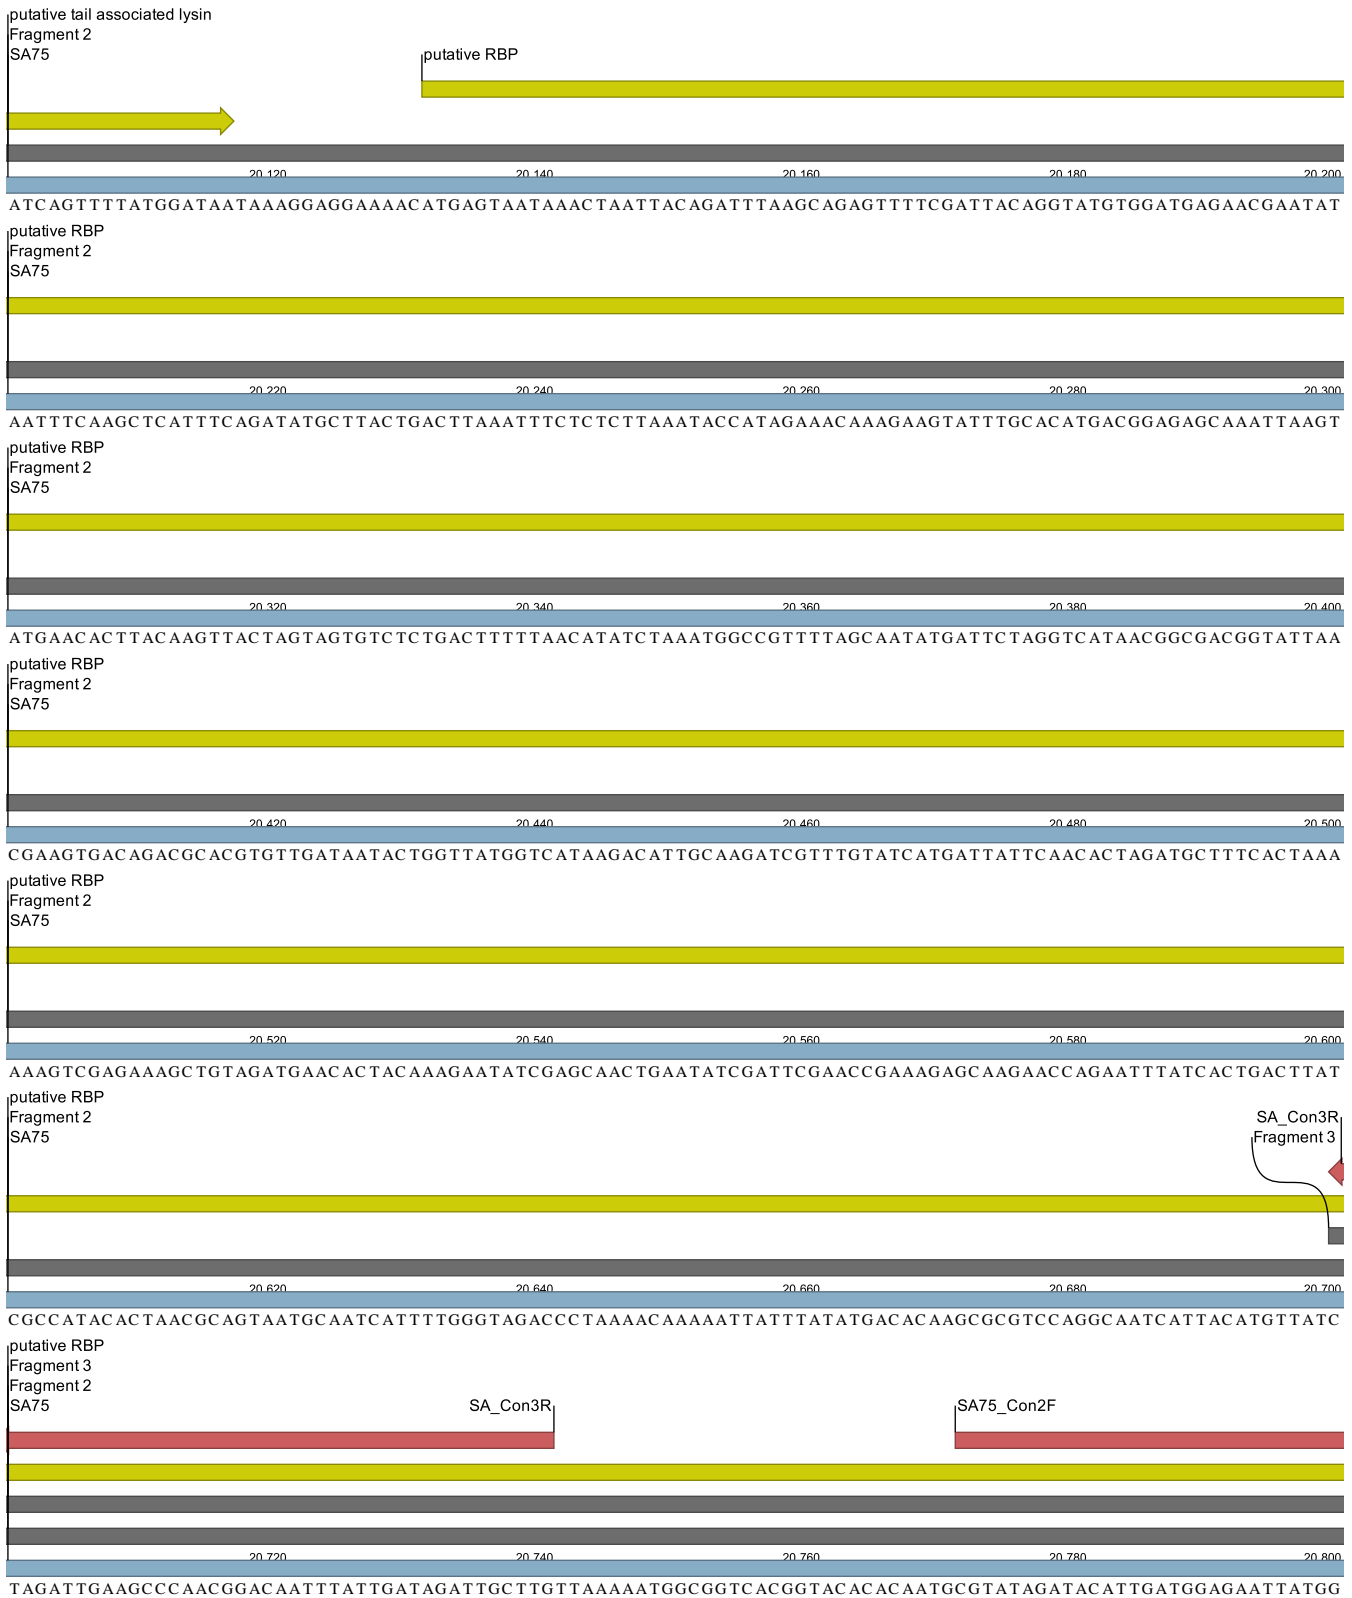

SA75\_Con2F  
putative RBP  
Fragment 3  
Fragment 2  
SA75

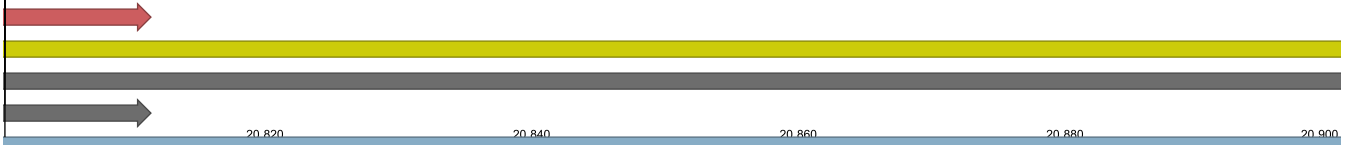

ATTTATTCAGCTGTATTGGACAGTAACAAAAACAACAAGTTTGTACGTTTCCAATATAGAAGCTGGAGAAATAACTTATGGTAATGAAATGCAAGATGTCA

putative RBP  
Fragment 3  
SA75

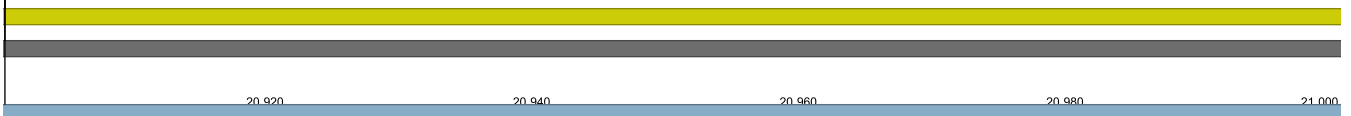

TGCCGAATATATTTAACGACAGATATACGTCAGCGATTTATAATCCGGTAGAAAATTTAATGATTTTAGACGTGAATATAAACCCACTGAAAGACAACT

putative RBP  
Fragment 3  
SA75

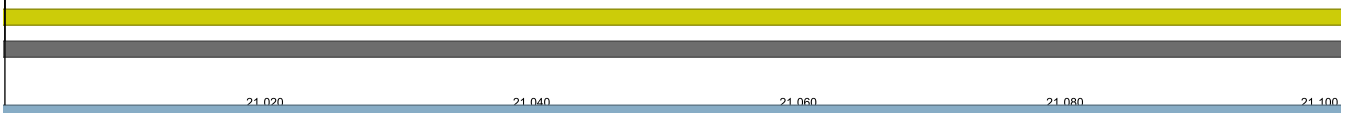

TAAGAATTCGTTGAACTTGTGAGGTTAGAAGTGCAGCATATTGATAAAGGTATAGACAAAGTATTGTATCAAATGGATATACCTATGGAATACACT

putative RBP  
Fragment 3  
SA75

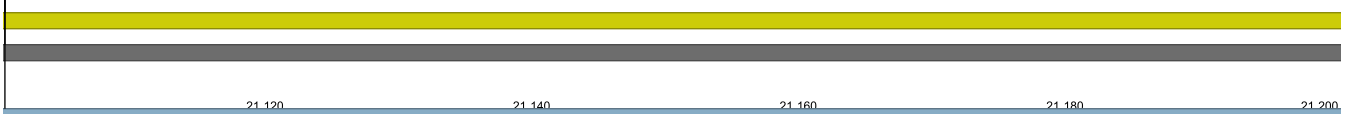

TCAGATACACAACCTATGCAAGGTATCACTTATGATGCAGGTATCTTATATTGGTATACAGGTGATTCGAATACAGCCAACCTAACTACTTACAAGGTT

putative RBP  
Fragment 3  
SA75

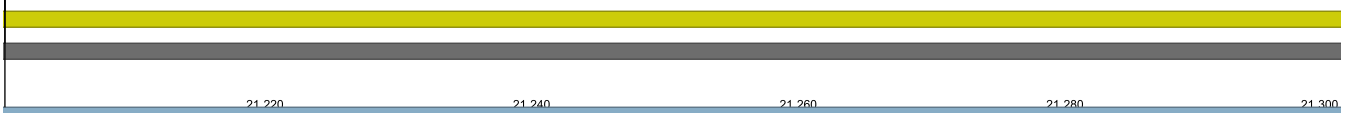

TCGATATAAAAACAAAAGAATTGTTATTTAAACGACGTATCGATATTGGTGGTGAATAATAACTTTAAAGGAGACTTCCAAGAAGCTGAGGGTCTAGA

putative RBP  
Fragment 3  
SA75

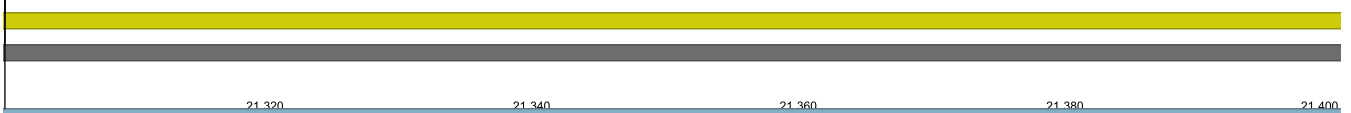

TATGTATTACGATCTAGAACAGGACGCAAGCGCTTTTAATAGGGGTAACTATTGGACC TGGTAAC AACAGACATCACTCAATTTATTCCATCGGCCAA

putative RBP  
Fragment 3  
SA75

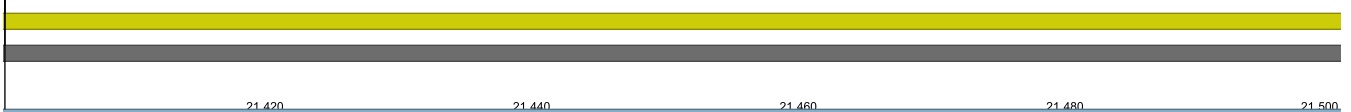

AGAGGTGTTAACCAATTC TTA AAAAACATCGCACCTCAAGTATCAATGACTGATT CAGGCGGACGTGTTAAACCGTTACCAATACAGAACCCAGCATATC

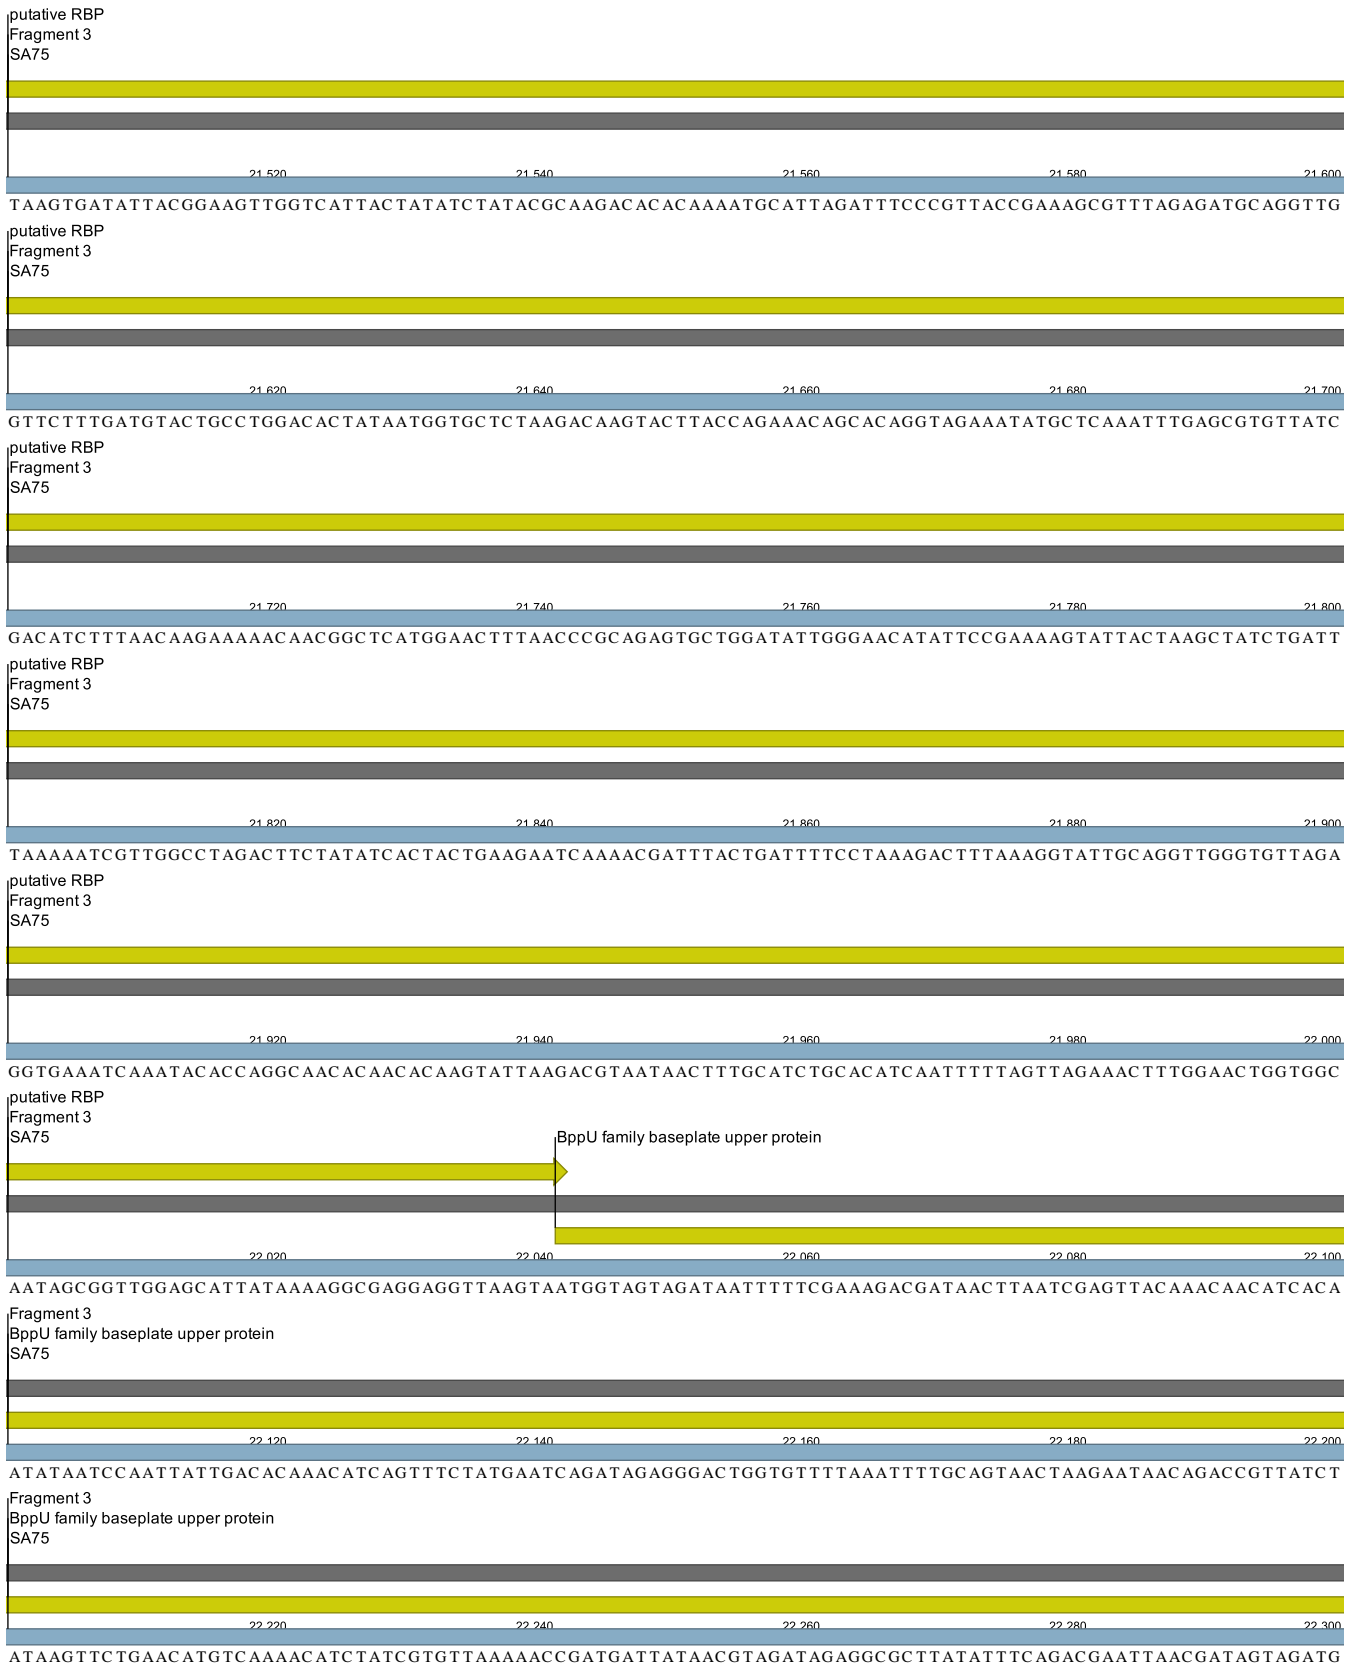

Fragment 3  
BppU family baseplate upper protein  
SA75

SA75\_delR3

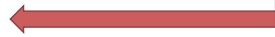

22 320 22 340 22 360 22 380 22 400

CAATTGATGGGCGTTTGCAGTATGTGATACCGAATGAATTTTAAAACATTCGGGTAAGGTGCATGCTCAAGCATCTTTACACAAAATGGGAGTAATAA

Fragment 3  
BppU family baseplate upper protein  
SA75

22 420 22 440 22 460 22 480 22 500

TGTTGTTGTTGAACGTC AATTTAGCTTCAATATCGAAAAATGATTTAGTTAGTGGGTTTGATGGTATAACAAAGCTTGTTTATATCAAATCTATTC AAGAT

Fragment 3  
BppU family baseplate upper protein  
SA75

22 520 22 540 22 560 22 580 22 600

ACTATCGAAGCTGTCGGTAAAGACTTTAACC AATTAAGCAAAAATATGGCTGATACACAAACGTTAATAGCAAAAGTG AATGATAGTGCACAAAAGGCA

Fragment 3  
BppU family baseplate upper protein  
SA75

22 620 22 640 22 660 22 680 22 700

TTCACAAAATCGAAATCAAGCAAAACGAAGCTATAC AAGCTATTACTGCGACGCAAACTAGTGCAACACAAGCTGTTACAGTG AATTCAGTAAAAATAGT

Fragment 3  
BppU family baseplate upper protein  
SA75

22 720 22 740 22 760 22 780 22 800

TGAAAAGGAGCAAGCGATATTTGCGCGTGTC AATGAAGTTGAGAAACAATCAATGGTGC TGACCTTGTC AAAGGTAACAACAACGACAAAATGGCAAAA

Fragment 3  
BppU family baseplate upper protein  
SA75

22 820 22 840 22 860 22 880 22 900

TCAAAAATTACTGATGATTATGGTAAAGCAATG AATCGTCTGAACAGTCCATAGATAGCGTTTTAAGCGCAATTAATACATCTAGGATTATTCATATCA

Fragment 3  
BppU family baseplate upper protein  
SA75

22 920 22 940 22 960 22 980 23 000

CTAGCGCGACAGATGCGCCCTCGTTTAAAGATATAGGC ACTTTAGAGACGCCTAAAGAAGATGGCGTTGATGATGGTTCGAAGTTTCAGCAACTACGAA

Fragment 3  
BppU family baseplate upper protein  
SA75

23 020 23 040 23 060 23 080 23 100

TACTTTAGGGAAATCAGGCTTGTTAGTTGTC TATGTTGTTGATGATAGTACGGCACGTGCAACATGGTATCCAGACGATTCAAAATGATGAGTACACAACA

Fragment 3  
BppU family baseplate upper protein  
SA75

23 120 23 140 23 160 23 180 23 200

TATAAAATCGGTGGCACATGGTATCAGTTC TATAAAAAAGTTGACGAAGAATTAACGAAGA AATTTGTTAAAGAAACATCTAAC AATGCTTTAAATCAAG

Fragment 3  
BppU family baseplate upper protein  
SA75

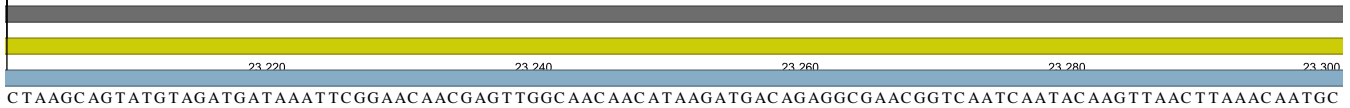

Fragment 3  
BppU family baseplate upper protein  
SA75

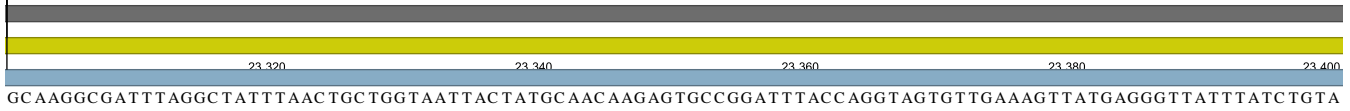

Fragment 3  
BppU family baseplate upper protein  
SA75

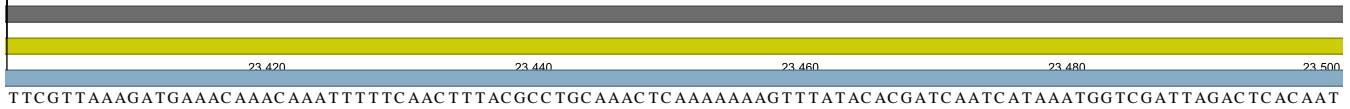

Fragment 3  
BppU family baseplate upper protein  
SA75

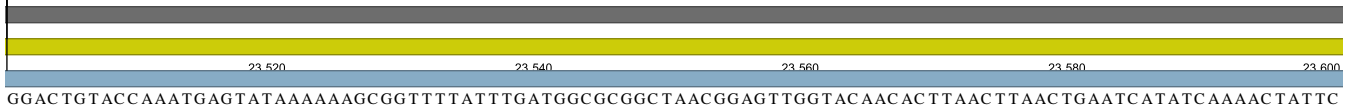

Fragment 3  
BppU family baseplate upper protein  
SA75

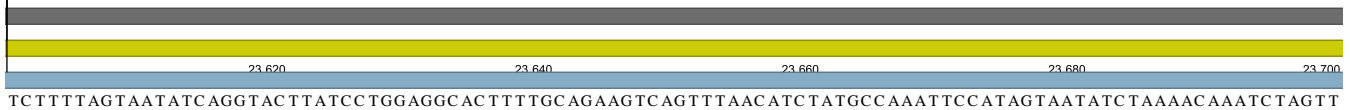

Fragment 3  
BppU family baseplate upper protein  
SA75

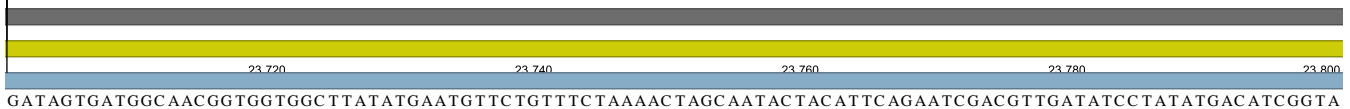

Fragment 3  
BppU family baseplate upper protein  
SA75

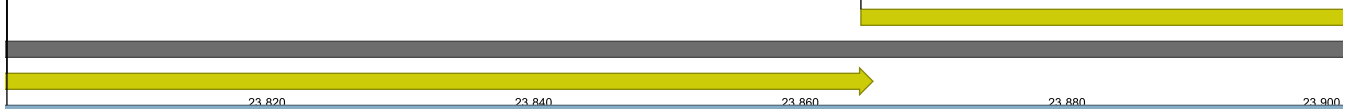

Fragment 3  
BppU family baseplate upper protein  
SA75

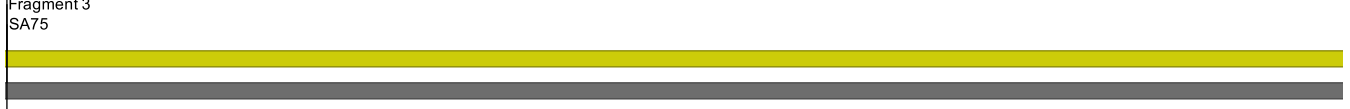

Fragment 3  
BppU family baseplate upper protein  
SA75

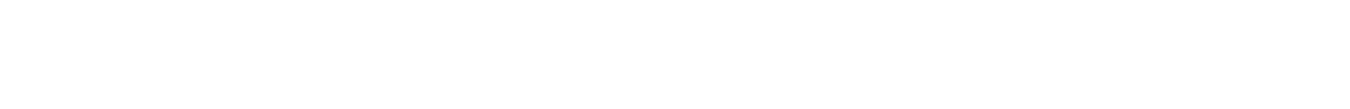

Fragment 3  
BppU family baseplate upper protein  
SA75



Fragment 3  
BppU family baseplate upper protein  
SA75

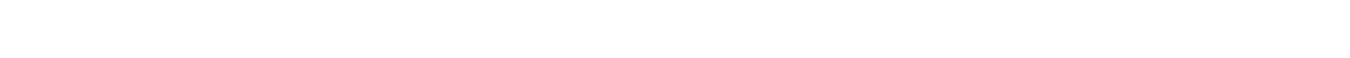

hypothetical protein  
Fragment 3  
SA75

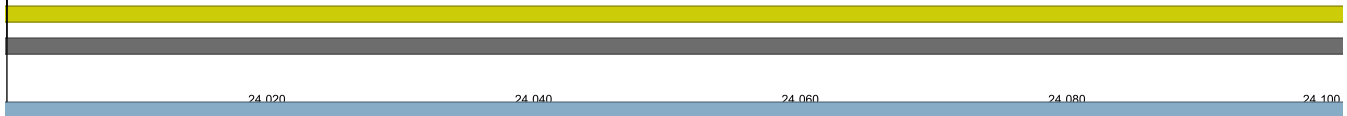

TCACAAACGGAGAAATTAATACACAATAATTCGAAAAAGAAGATGATTGAAACACACCAGGACAAACAACTGCATCGGATTGAGTGACGAGGAAC

hypothetical protein  
Fragment 3  
SA75

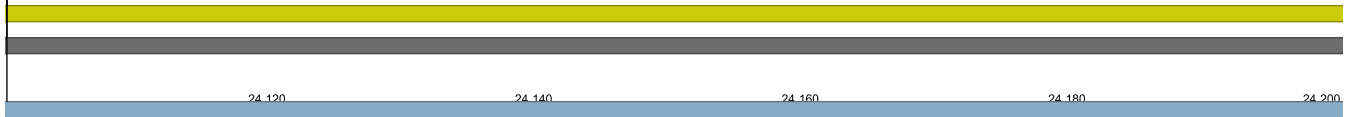

TCGCAGCATGGTTGCGAGTATGCAAAATGCAGATGACGCAAGTGAACATGTTGACAAATGAAATTGACGCAACAAAACGCTATGTTAACACAACAGTTGACC

hypothetical protein  
Fragment 3  
SA75

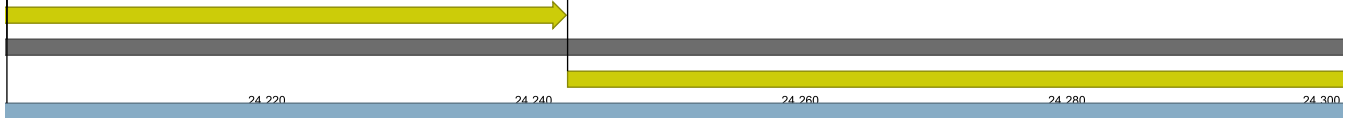

GAACTGACAACTAACAAAACAAATACTGAGGGGGACGTTTAAATGATGAAGATGATTTATCCAACTTTAAAGACATTAACATTTTTATGTTGGGGTT

Fragment 3  
hypothetical protein  
SA75

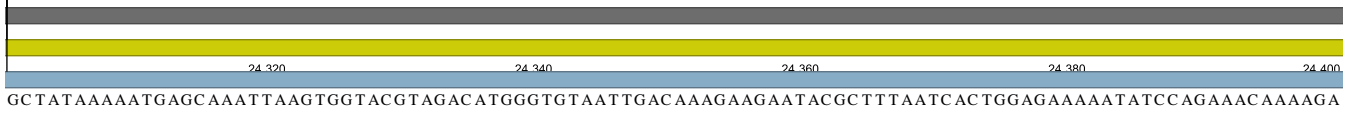

GCTATAAAAATGAGCAAATTAAGTGGTACGTAGACATGGGTGTAATTGACAAAGAAGAATACGCTTTAATCACTGGAGAAAAATATCCAGAAACAAAAGA

Fragment 3  
hypothetical protein  
SA75

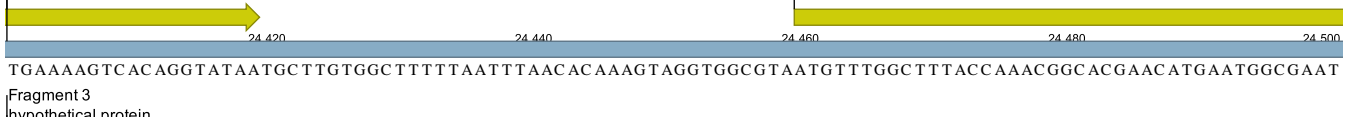

TGAAAAGTCACAGGTATAATGCTTGTGGCTTTTAAATTAACACAAAGTAGGTGGCGTAATGTTTGGCTTTACCAAACGGCACGAACATGAATGGCGAAT

Fragment 3  
hypothetical protein  
SA75

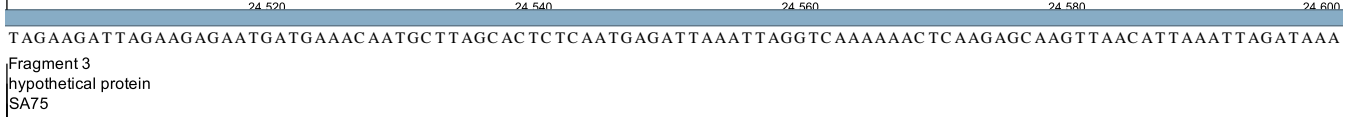

TAGAAGATTAGAAGAGAAATGATGAAACAATGCTTAGCACCTCAATGAGATTAATTAGGTCAAAAAATCAAGAGCAAGTTAACATTAATTAGATAAA

Fragment 3  
hypothetical protein  
SA75

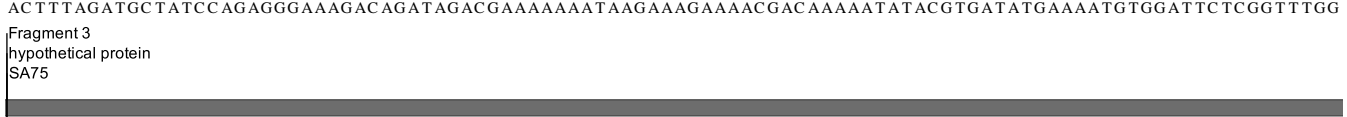

ACTTTAGATGCTATCCAGAGGAAAAGACAGATAGACGAAAAAAATAAGAAAGAAAACGACAAAAATATACGTGATATGAAAATGTGGATTCGCGTTTGG

Fragment 3  
hypothetical protein  
SA75

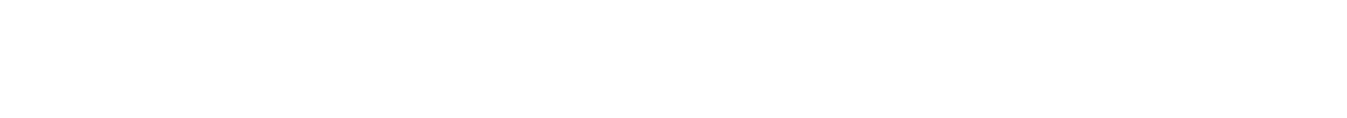

TAGGGACTATCTTTAGTACGATTGTCATAGCCTTAATAAGAACCATTTTCGGTATTTAAAGGAGGTGATCACCATGCTTAAAGGATTCCTCGGATATAGT



Fragment 3  
lysine  
SA75

24.820 24.840 24.860 24.880 24.900

TTC TGGGCATGC TTC TGGTTTGGTAAATGTAAGTAATGTATAGGAGTCAGTGC TAAGGCAC TGGCTTTTATTTTGATTGAAATGAGGTGCATACATGGG

Fragment 3  
lysine  
SA75

24.920 24.940 24.960 24.980 25.000

ATTACCTAATCCAAAGACTCGAAAACCTACAGCTAGTGAAGTGGTTGAATGGGCGTTATATATCGCTAAAAACAAAATAGCTATTGATGTACCTGGTTCT

Fragment 3  
lysine  
SA75

25.020 25.040 25.060 25.080 25.100

GG AATGGGAGCACAATGCTGGGATTACCTAATTATTTACTCGATAAAATATGGGGGTTTAGAACAATGGGGAATGCTGATGCTATGGCTCAGAAAATCTA

Fragment 3  
lysine  
SA75

25.120 25.140 25.160 25.180 25.200

ATTATAGAGGTAGAGATTTCAAGATAATTAGAAAATACAAAAGATTTTGTACCACAACCAGGCGACTGGGGTGTTTGGACTGGTGGTTGGGCAGGACATGT

Fragment 3  
lysine  
SA75

25.220 25.240 25.260 25.280 25.300

AAACATGTAGTGGGACCATGCACAAAAGACTATTGGTATGGTGTGGATC AAAACTGGTATACAAAATAATGCAACAGGAAGTCCGCCGTAAAAATCAAA

Fragment 3  
lysine  
SA75

25.320 25.340 25.360 25.380 25.400

C ACTCTTATCATGATGGACAGGTGGAGGAGTTAAATATTTTGTAGACCACCATATCATCCGGAGAAATCTACGCCGGCACCTAAACCCGAAGACGACA

Fragment 3  
lysine  
SA75

25.420 25.440 25.460 25.480 25.500

GTGATAATAACGAAAAAATAATAAAAAAGTTCCGATTTGGAAAGATGTAACAACATAAAGTACACAATTTCTAGTCAAGAAGTTAATTATCCAGAATA

Fragment 3  
lysine  
SA75

25.520 25.540 25.560 25.580 25.600

TATTTATCATTATAGTAGAGGGTAATCGACGACTCGAAAACCTAAAGGAATAATGATTAGAAATGCTCAAACAATGAGTTTCAGTAGAAAATTTATAT

Fragment 3  
lysine  
SA75

25.620 25.640 25.660 25.680 25.700

AACAGTAGGAAGAAATACAAACAAGATGTGGAATATCCCCACTTTTATGTAGATAGACATAATATTTGGGCTCC TAGAAGAGCGGTATTTGAGGTTCCTA

Fragment 3  
lysin  
SA75

25.720 25.740 25.760 25.780 25.800  
ATGAACCTGATTATATAGTTATAGACGTATGTGAAGATTATAGTGCAGTAAAAACGAATTATTTTCAATGAAATTCACGCAATGGTTGTAGCTGTAGA

Fragment 3  
lysin  
SA75

25.820 25.840 25.860 25.880 25.900  
TATGATGATCAAATATGAGATACCTCTAAGTATTGAAAAATTTAAAAGTAGACGACAGCATTGGCGTTCTATGTTGGAACATGTTAATTGGAATATGATT

Fragment 3  
lysin  
SA75

25.920 25.940 25.960 25.980 26.000  
GACAACGGTGTTCCTCCCTAAAGATAAATACGAAGCATTAGAAAAGGCATTATTTAATATATTTAAAAACAGAGAAAAATTTAATAATTCATAACATAAC

Fragment 3  
lysin  
SA75

26.020 26.040 26.060 26.080 26.100  
CAACAGTAACAAAATCTAGAATAAAAGTTATGGTAGATAATAAAAACGCTGATATAGCGAATGTAAGAGACTCATCACCAACAGCTAAC AATGGCTCGGC

Fragment 3  
lysin  
SA75

26.120 26.140 26.160 26.180 26.200  
ATCTAAACAACCGCAGATTATAAC TGAACGAGCCCTTATACATTC AAACAAGC ACTGGATAAACAAATGGCAAGAGGTAAACCGAAAAAATCTAATGCT

Fragment 3  
lysin  
SA75

26.220 26.240 26.260 26.280 26.300  
TGGGGCTGGGCTAACGCTACACGAGCTCAAACGGGCTCGGC AATGAATGTTAAACGAATATGGGAAAGTAACACGCAGTGTACCAATGCTTAATTTAG

Fragment 3  
lysin  
SA75

26.320 26.340 26.360 26.380 26.400  
GCAAGTATCAAGGTGTTTCAGTTAGTTTACTTAATAAGATAC TTAAGGTAAGGGGACATTGAATAATCAAGGTAAGCGTTTCGCAGAAGCTTGTA AAAA

Fragment 3  
lysin  
SA75

26.420 26.440 26.460 26.480 26.500  
GCACAACATTAATGAAATTTATTTAATCGGCATGCTTCTTAGAAAAGTGATATGGAAC AAGTAAC TTCGCTAACGGAAAAAGTGGAGTATACAAC TAC

Fragment 3  
lysin  
SA75

26.520 26.540 26.560 26.580 26.600  
TTCGGCATTGGCGTTACGACAAC AATCCTAACTACGCAATGACGTTTGTAGGAATAAAGGTTGGACATCTCCAGCAAAAGCAATCATGGGCGGTGCTA

Fragment 3  
lysine  
SA75

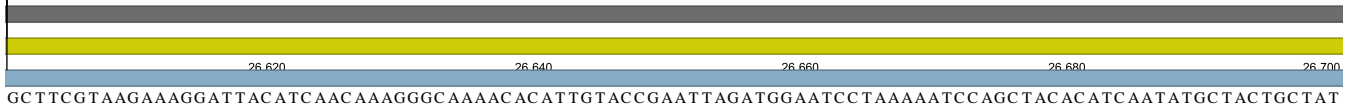

Fragment 3  
lysine  
SA75

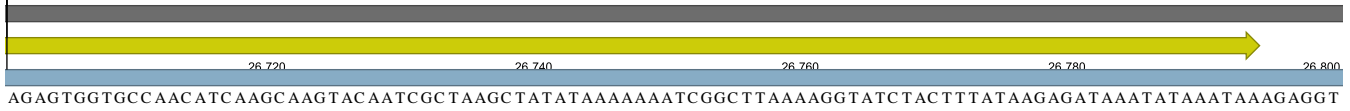

Fragment 3  
SA75 hypothetical protein

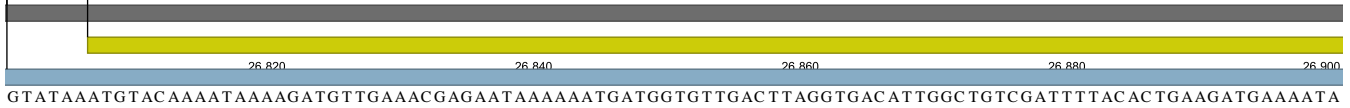

Fragment 3  
hypothetical protein  
SA75

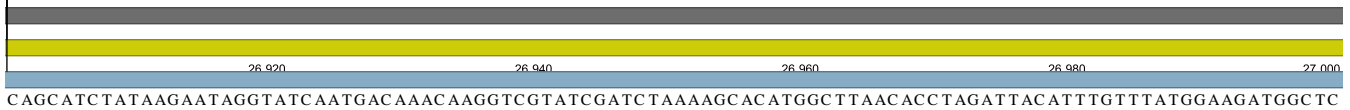

Fragment 3  
hypothetical protein  
SA75

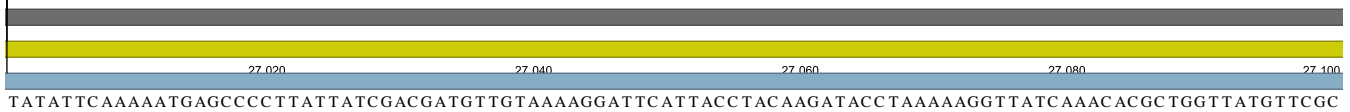

Fragment 3  
hypothetical protein  
SA75

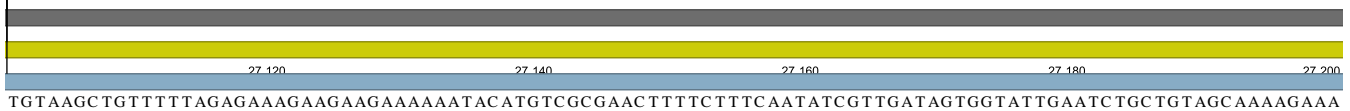

Fragment 3  
hypothetical protein  
SA75

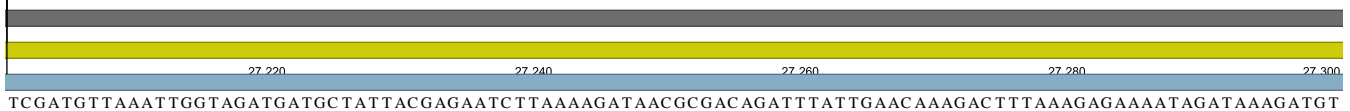

Fragment 3  
hypothetical protein  
SA75

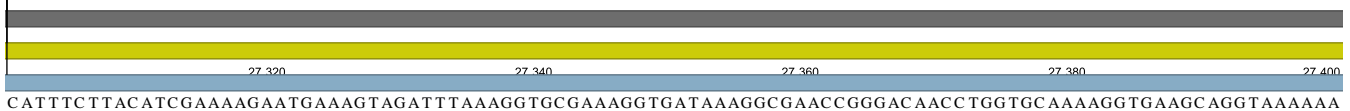

Fragment 3  
hypothetical protein  
SA75

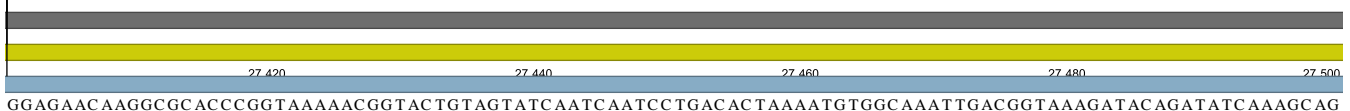

Fragment 3  
hypothetical protein  
SA75

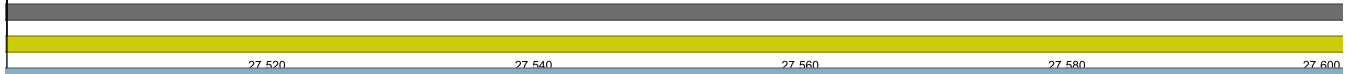

AACCTGAGTTAT TGGATAAAATCAATATCGCAAATGTTGAAGGGTTAG AAGATAAAT TGC AAGAAGT TAAAAAATCC AAGATACA ACTC TCAACGACTC

Fragment 3  
hypothetical protein  
SA75

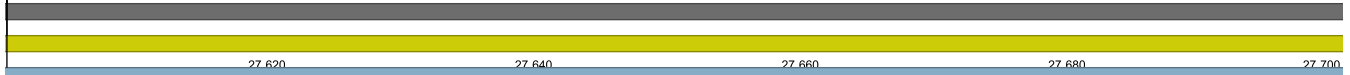

TAAAACGTATACGGATTC AAAAAT TGCTGAACTAGTTGATAGCGCGCCTGAATCTATGAACACATT AAGAGAATTAGCAGAAGCAATACAAAACA ACTCT

Fragment 3  
hypothetical protein  
SA75

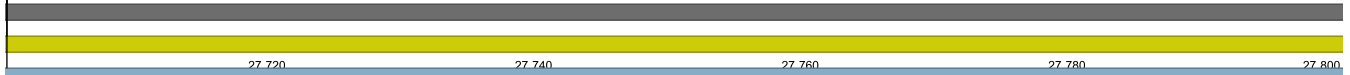

ATTTCAGAAAGTG TATTGCAACAGATTGGCTCAAAGTTAGTGCAGAAGATTTTGAGGAATTC AAACAACAC TAAATGATTTATACGCTCCAAAAAATC

Fragment 3  
hypothetical protein  
SA75

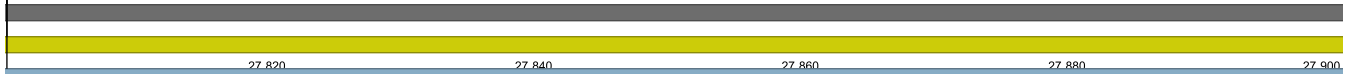

ATAATCATGACGAGCGGTATGTTTTGTCATCTCAAGCTTTTACTAAACAACAAGCGGATAATTTATATCAACTAAAAGCGCATCTCAACCGACGGTTAA

Fragment 3  
hypothetical protein  
SA75

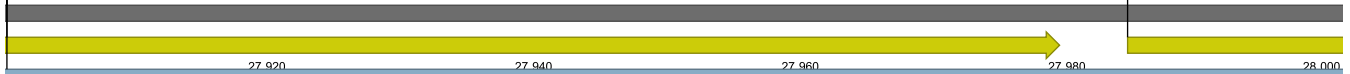

AATTTGGACAGGAACAGAAAATGAATATAACTATATATATCAAAAAGACCC TAATACACTTTACTTAATTAAGGGGTGATTTTTATGGAAGGTAATTTTA

Fragment 3  
hypothetical protein  
SA75

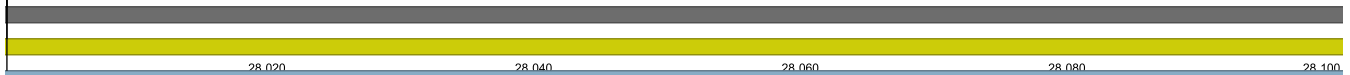

AAAATGTAAAGAACTTATTTACGAAGGCGAAGAATATACAAAAGTATATGCTGGAAATATCCAAGTATGGAAAAAGCCTTCATATTTTGTAAATAAAC

Fragment 3  
hypothetical protein  
SA75

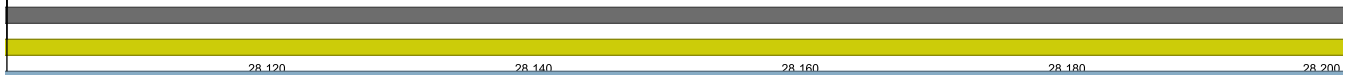

CTTACCTAAAAATAAATATCCGGATAGCATAGAAGAAATCAACAGCAAAAATGGACAATAAATGGAGTTGAACCTAATAAAAGTTATCAGGTGACAATAGAA

Fragment 3  
hypothetical protein  
SA75

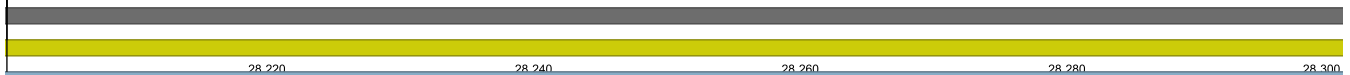

AATGTACGTAGCGGTATAATGAGGATTTTCGCAAACTAATTTAGGTTCAAGTGAATTAGGAATATCAGGAGTCAATAGCGGAGTTGCAAGTAAAAATATCA

Fragment 3  
hypothetical protein  
SA75

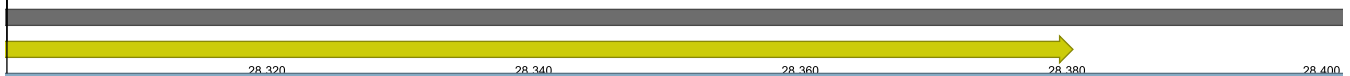

ACTTTAGTAATCCTCAGGGACGTTGTATGTCACATAAGTGATGTTTATTCAGGATCTCCGACATTGACCATTGAATAATTTTAAACGACTAATTTTAA

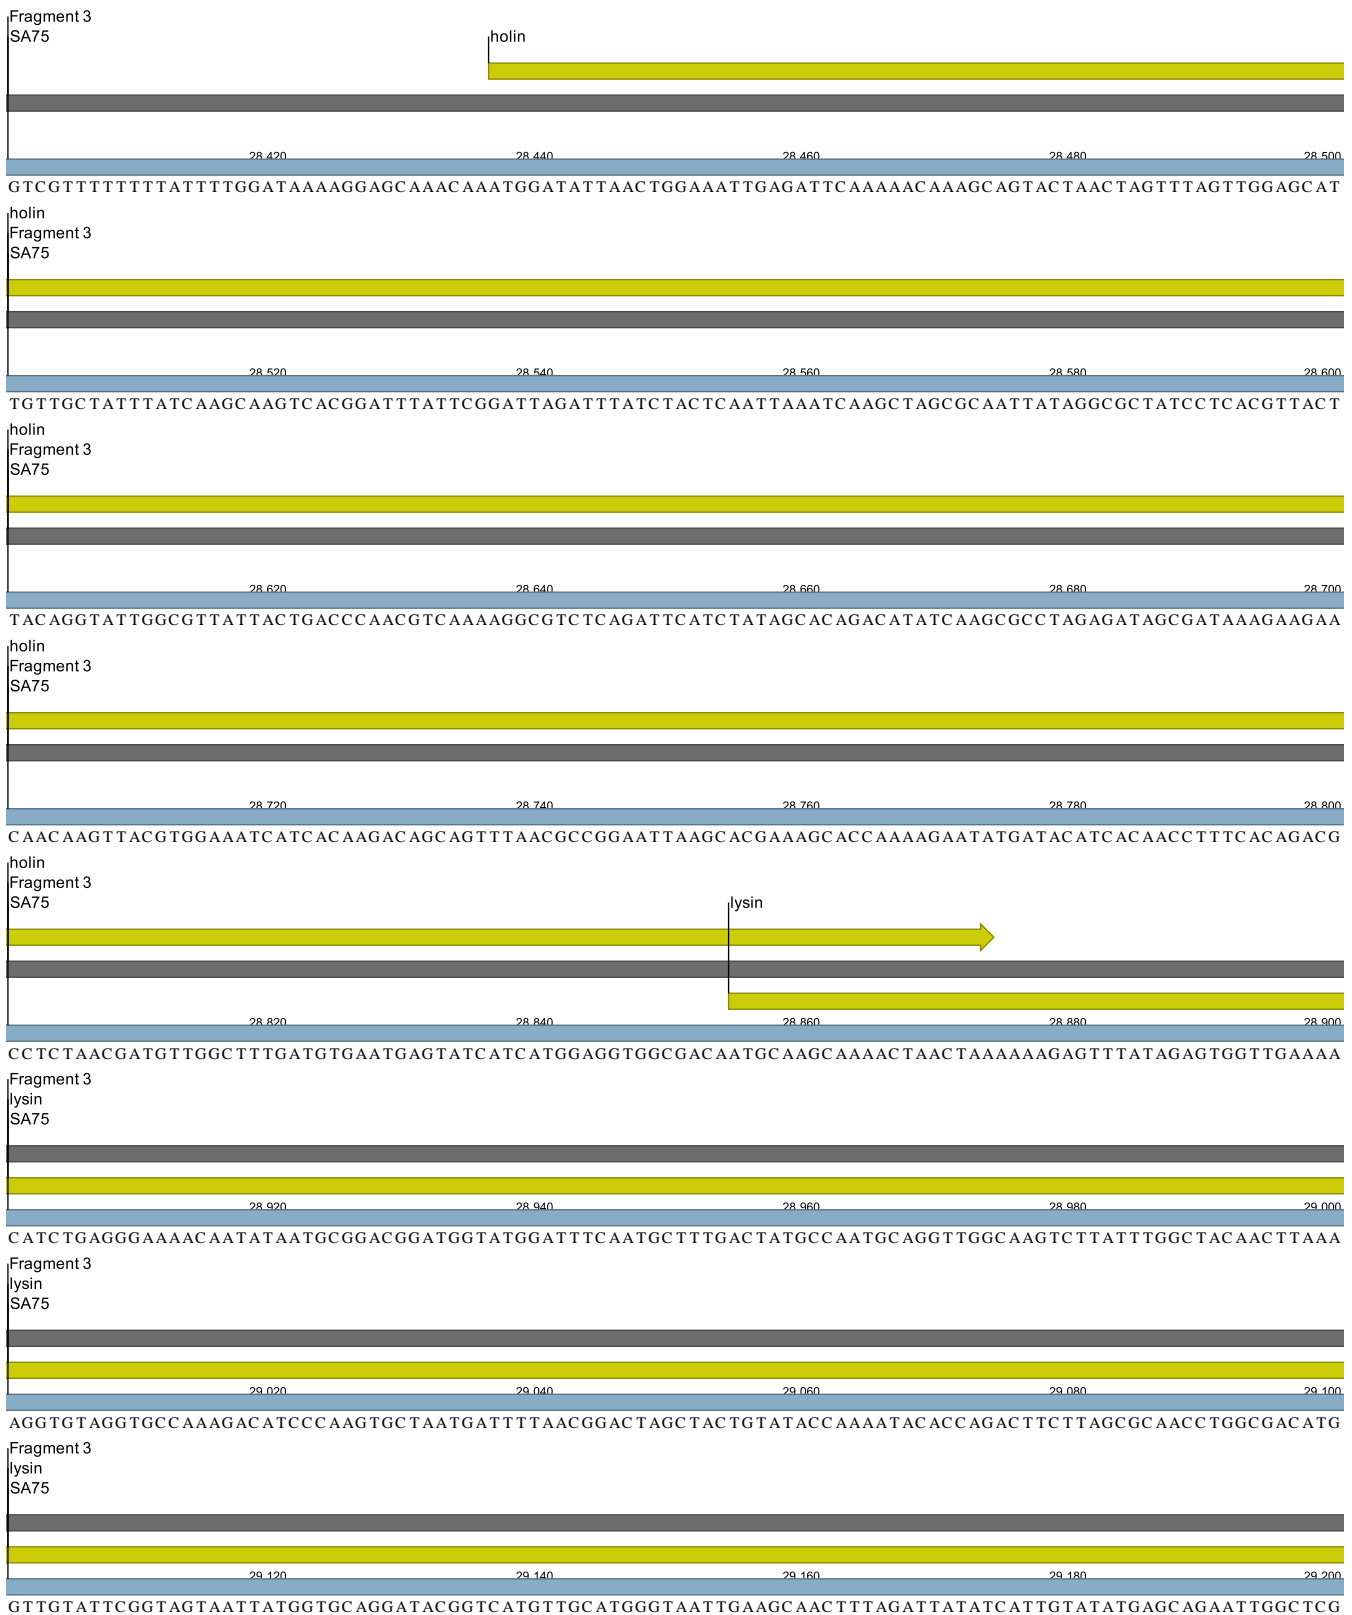

Fragment 3  
lysin  
SA75

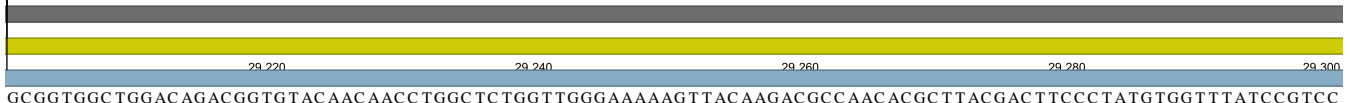

Fragment 3  
lysin  
SA75

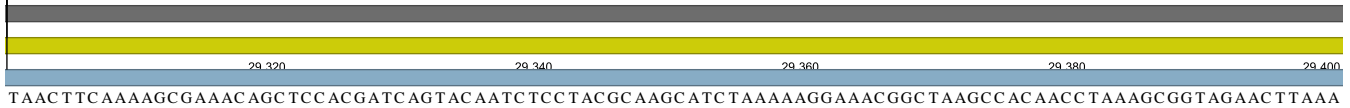

Fragment 3  
lysin  
SA75

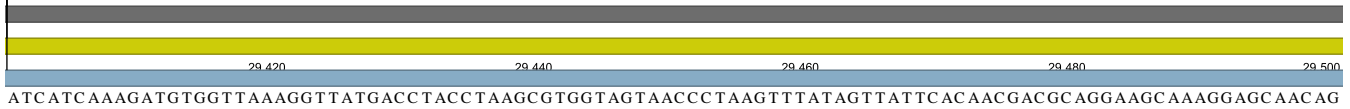

Fragment 3  
lysin  
SA75

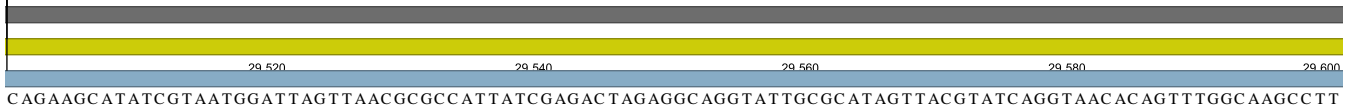

Fragment 3  
lysin  
SA75

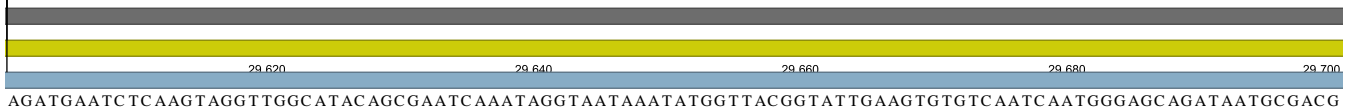

Fragment 3  
lysin  
SA75

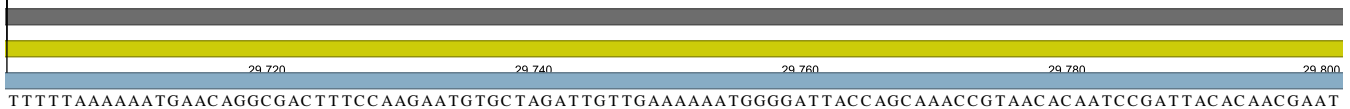

Fragment 3  
lysin  
SA75

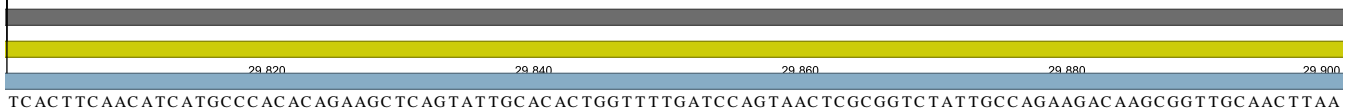

Fragment 3  
lysin  
SA75

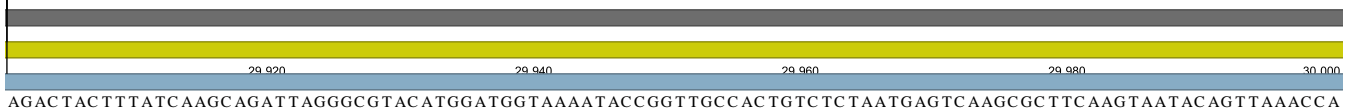

Fragment 3  
lysin  
SA75

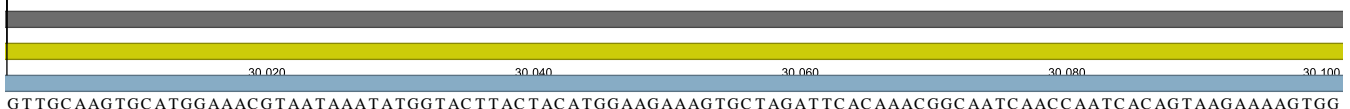

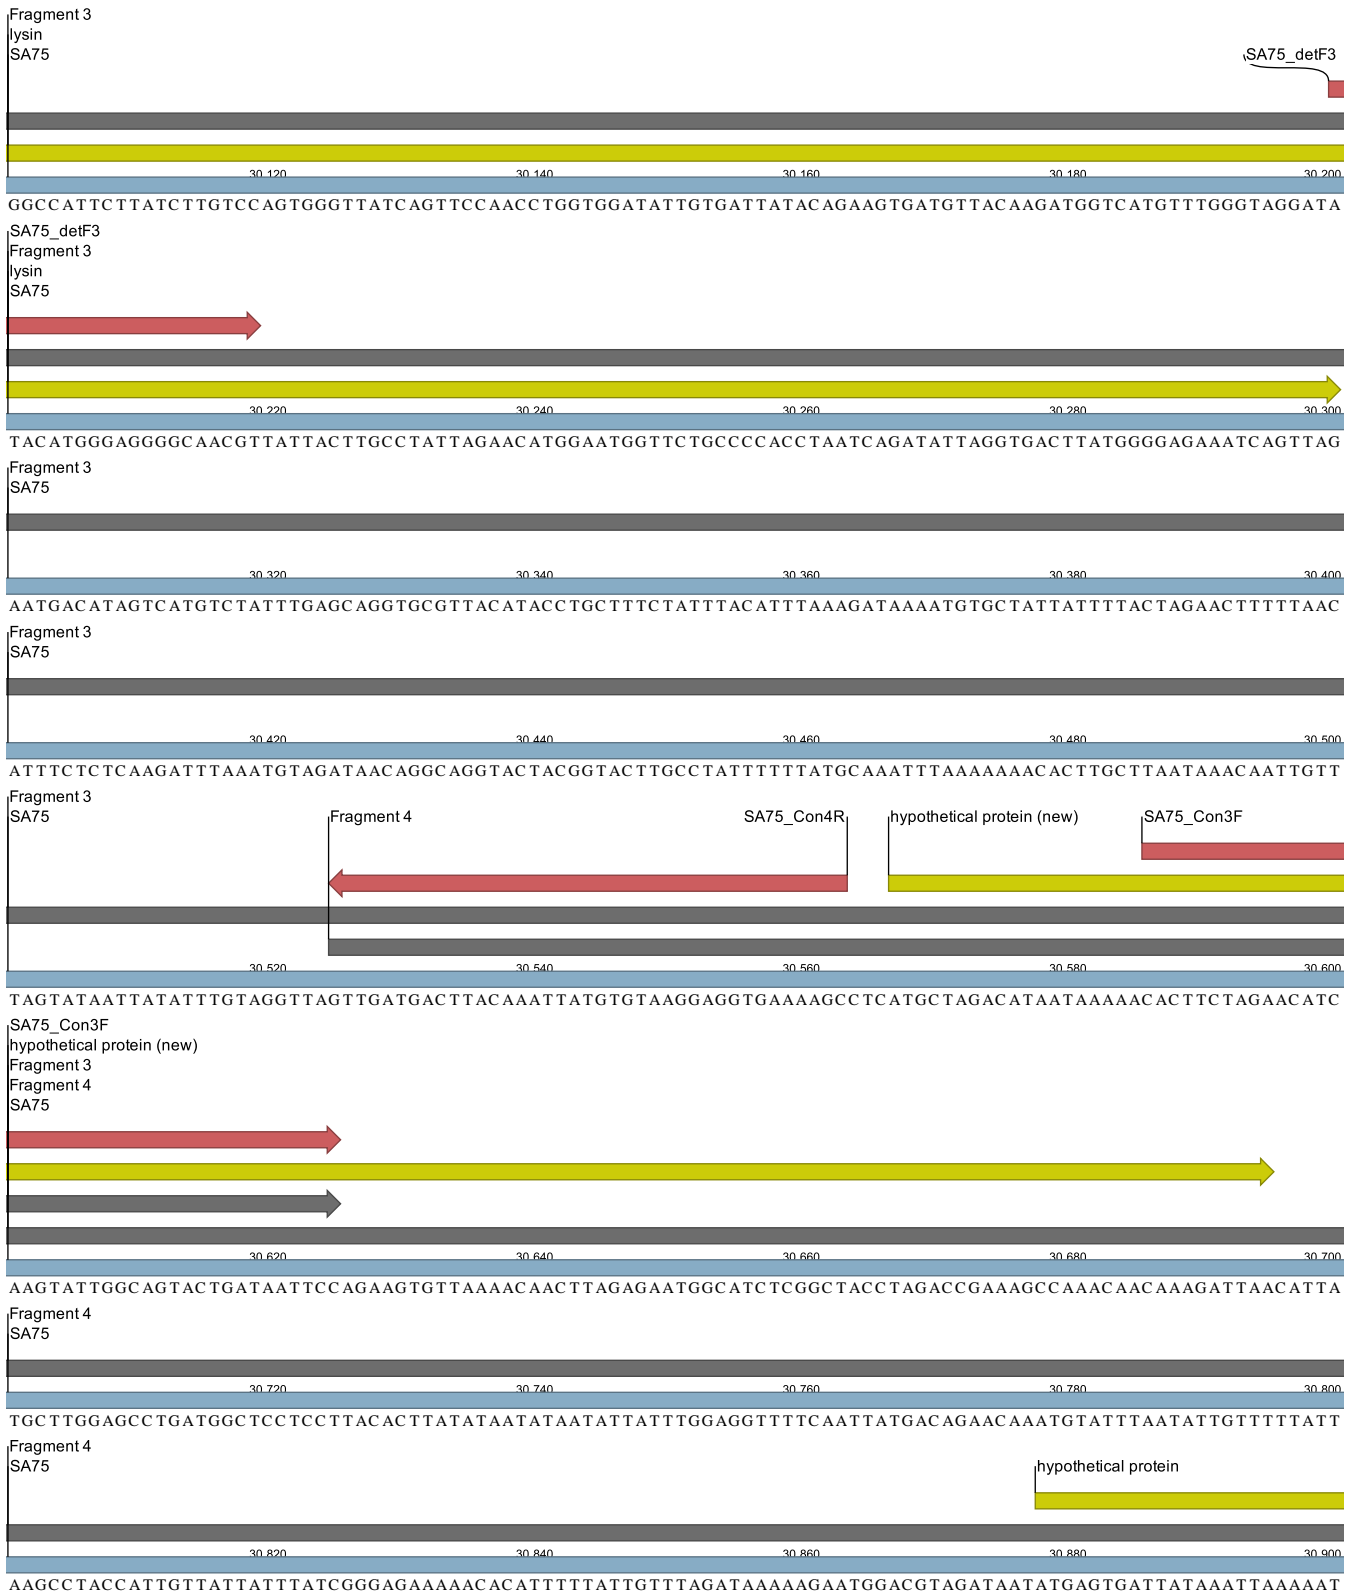

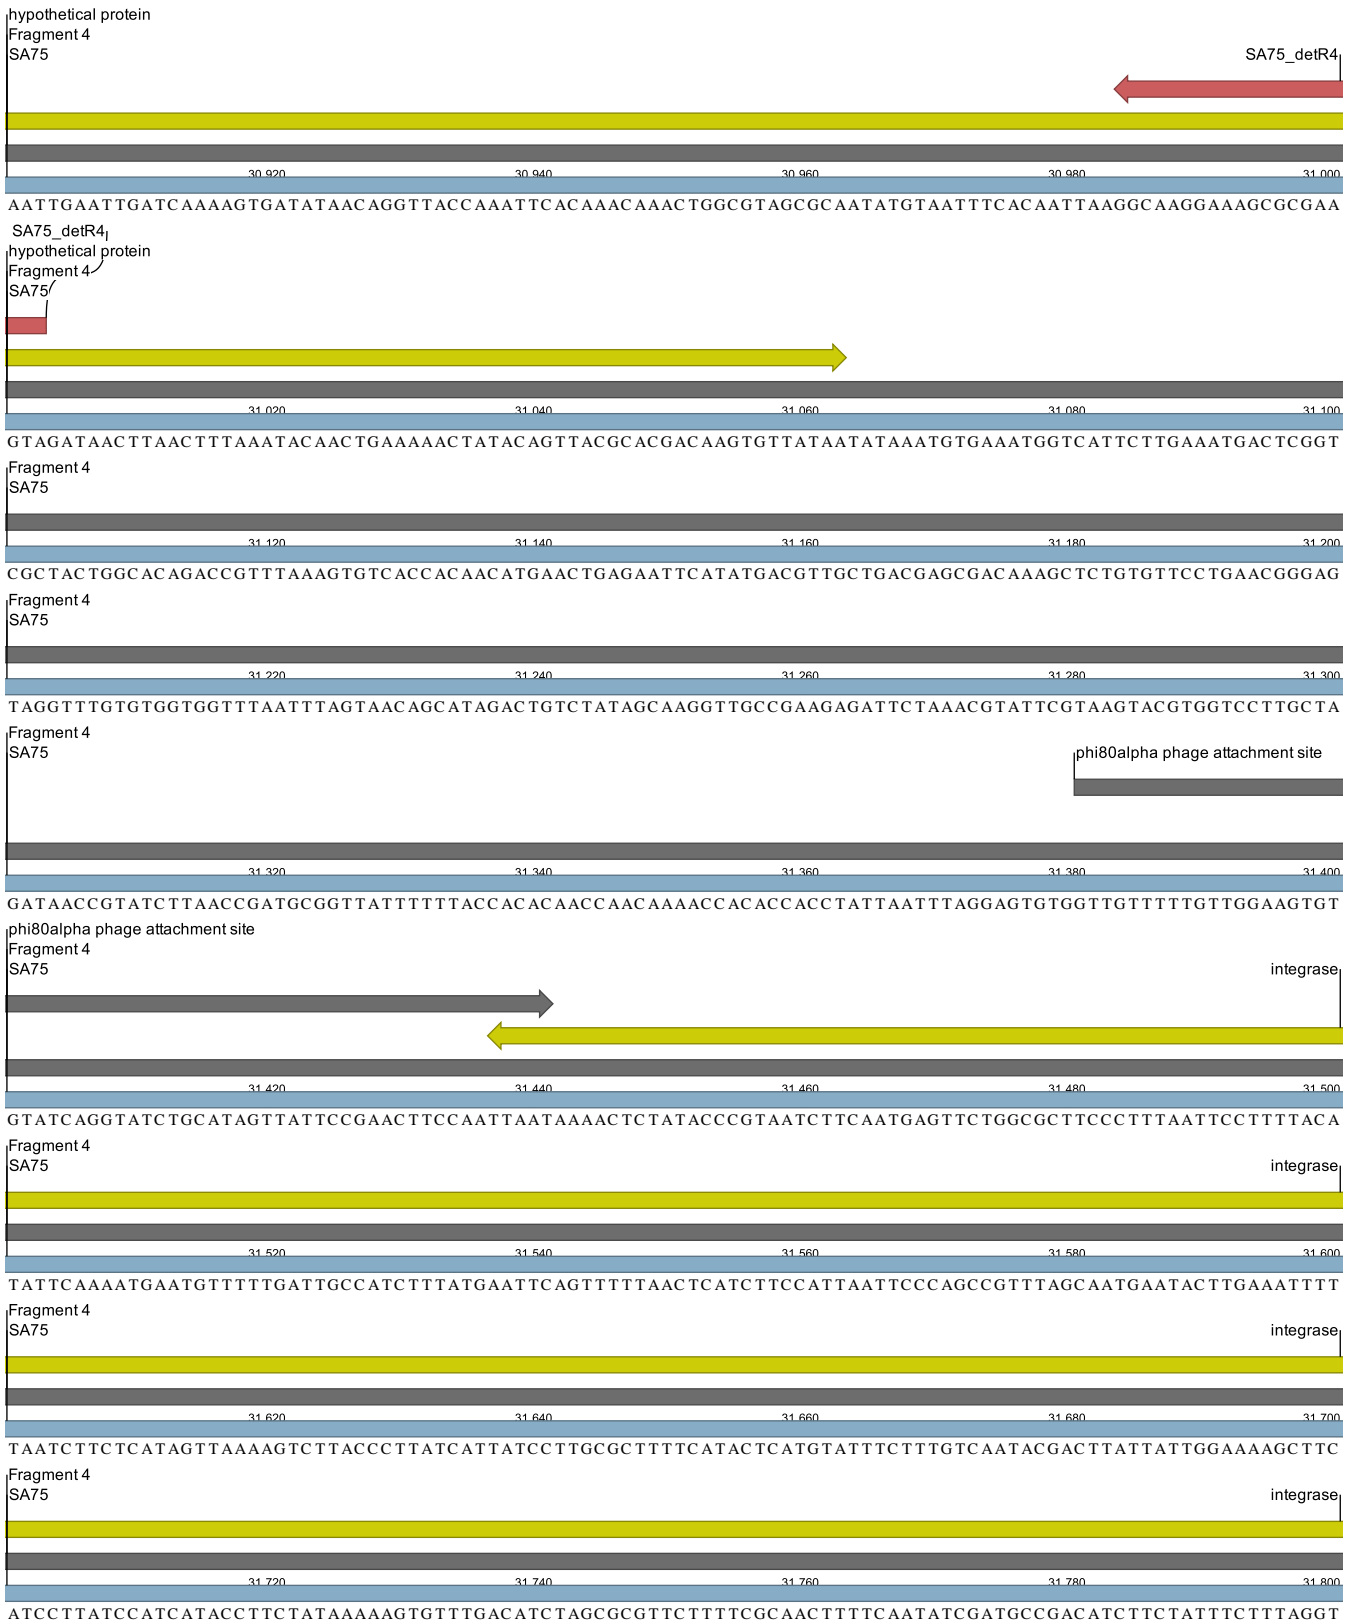



Fragment 4  
SA75 integrase

31 820 31 840 31 860 31 880 31 900

TGGTTTTTCGATTTTATATGATGTTAAATCAAATTGTTTTAGATAAATTGTAAAATTGTTTTAAAACC TCGCCTTCGTCGATGTTACATGCATTTTTATTTT

Fragment 4  
SA75 integrase

31 920 31 940 31 960 31 980 32 000

TAGTATTTTGCAGTTAGAACAAAAGTATAGTTTAGAATACCAAACCTCTTTATTTTAGGCGTATGCTTGACTGTGTTAAAGTCAATTTCTGGTTACA

Fragment 4  
SA75 integrase

32 020 32 040 32 060 32 080 32 100

GTTTGGACATAATAGTTTACTTCTGAAAATAGCGTTATGTTTTACGATTGTAGAGTTAGTTTTTTCACCTTATCCTTAATTTTATTTCTTCGTATTCTTCT

Fragment 4  
SA75 integrase

32 120 32 140 32 160 32 180 32 200

TCACTTATAATAGCTTCGTGGGTGTTTTTCGACGAATATGTCACCGAAAACAAGATGACCTCTAGCTACCGGACTCGTTAGAGCATTGCCATAACTGATC

Fragment 4  
SA75 integrase

32 220 32 240 32 260 32 280 32 300

TGTGCCAGTTTTTACCTAAGGGTGC TTTGTATTTAGAGTTGTCAATTTATAGTTATTTCTCTTAAACTAGTACCTTTTTTCGCTTCTTCTACTGCAAA

Fragment 4  
SA75 integrase

32 320 32 340 32 360 32 380 32 400

TCGTAATACTTTTTTATATTCATTAGGCACAAATTTATCGTTTACTCTGTCGTAATAGAAAGGAGGGACAGTTTTAGCTAACCCTTTTCTAGCTGATGCG

Fragment 4  
SA75 integrase

32 420 32 440 32 460 32 480 32 500

CGTCGACCCATTGCAGTACGCTCTTGAATTGTAGTACGCTCCC ACTCTGCCATAGCACCTACTAATGTTACGAACAACGTCCC ATAGCAGAAGTTGTGT

Fragment 4  
SA75 integrase

32 520 32 540 32 560 32 580 32 600

CATATACTTCTGTTGCGCTCC TAAACAACACGTTTTTATTTCTCAAACAATTCTAGTATCTCTAGTAAGCTTTAACAAC TTCGAGTTAATCGATCTAGTTT

Fragment 4  
SA75 integrase

32 620 32 640 32 660 32 680 32 700

ATAGACTAAAACCAAATCAAATTAATCTATTTTCATTCAACATTTCTTTGTAAAGCGGGTCTGTC TTTTTTAGCTCCGGAGTATCCAGCGTCACTATATACT

Fragment 4  
SA75 integrase

32 720 32 740 32 760 32 780 32 800

TTATGAATTTCCAGTCGTTTATGTCGCTGTAAGCTCTTAATTTCTTTCTTTGTTCTTCGATAGAGTGTCC TTTTCTTTTGTTC AAGTGACTCACTC

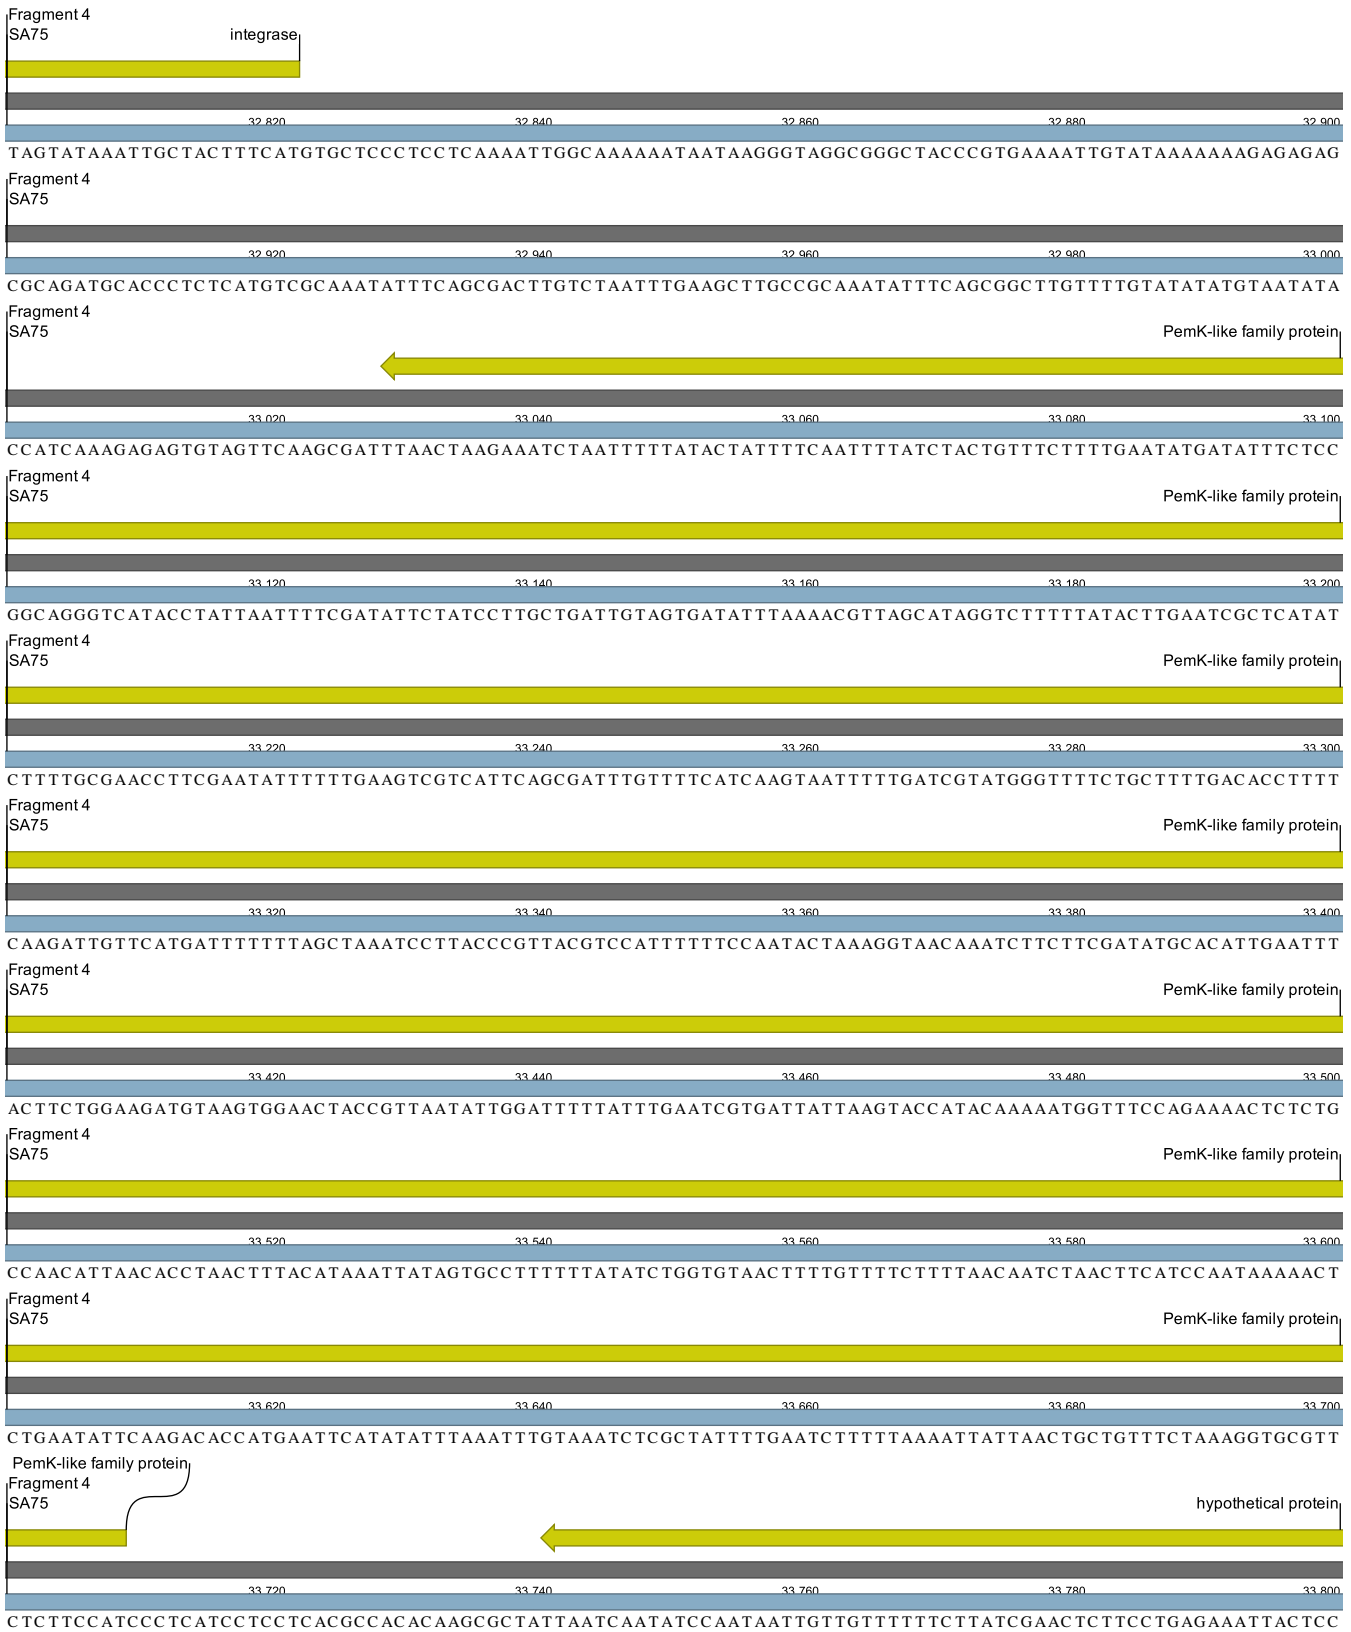

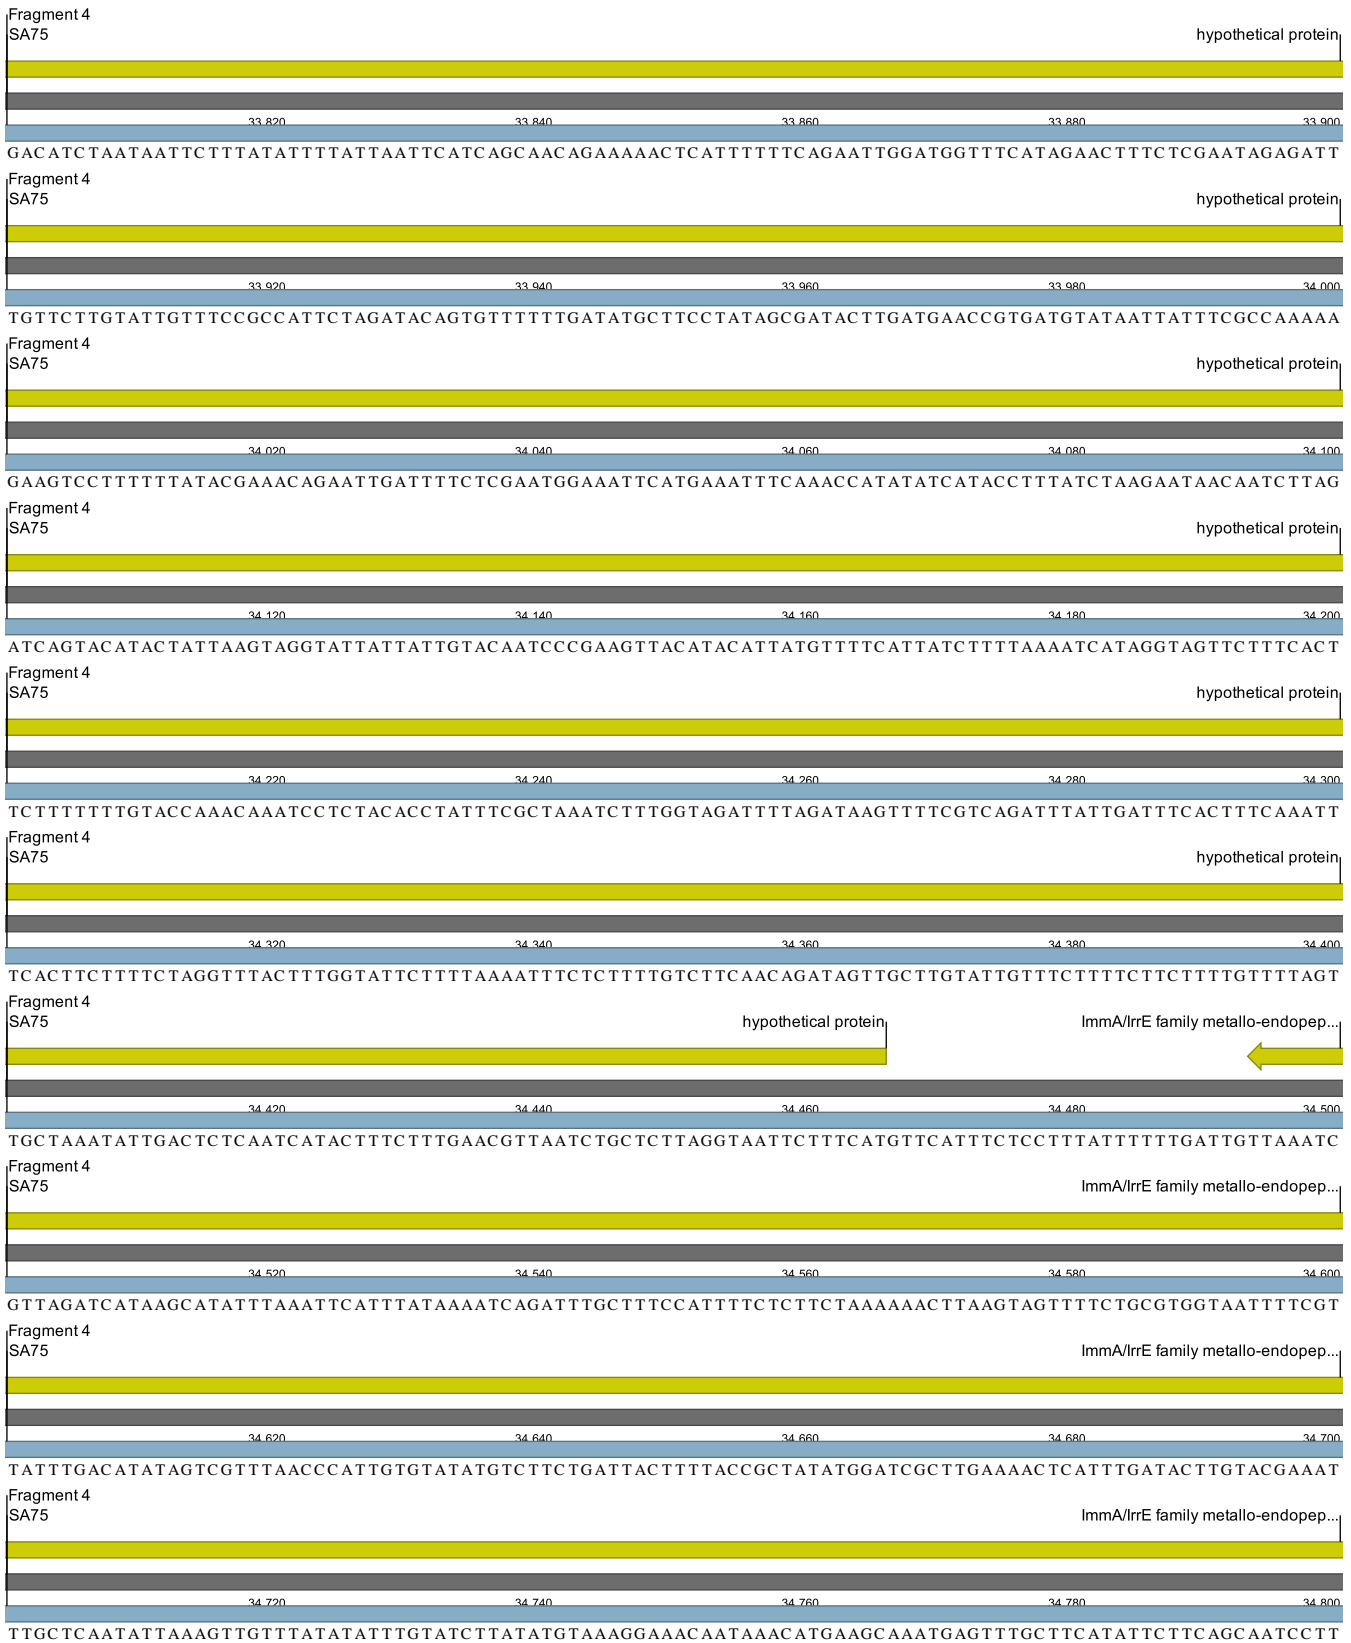

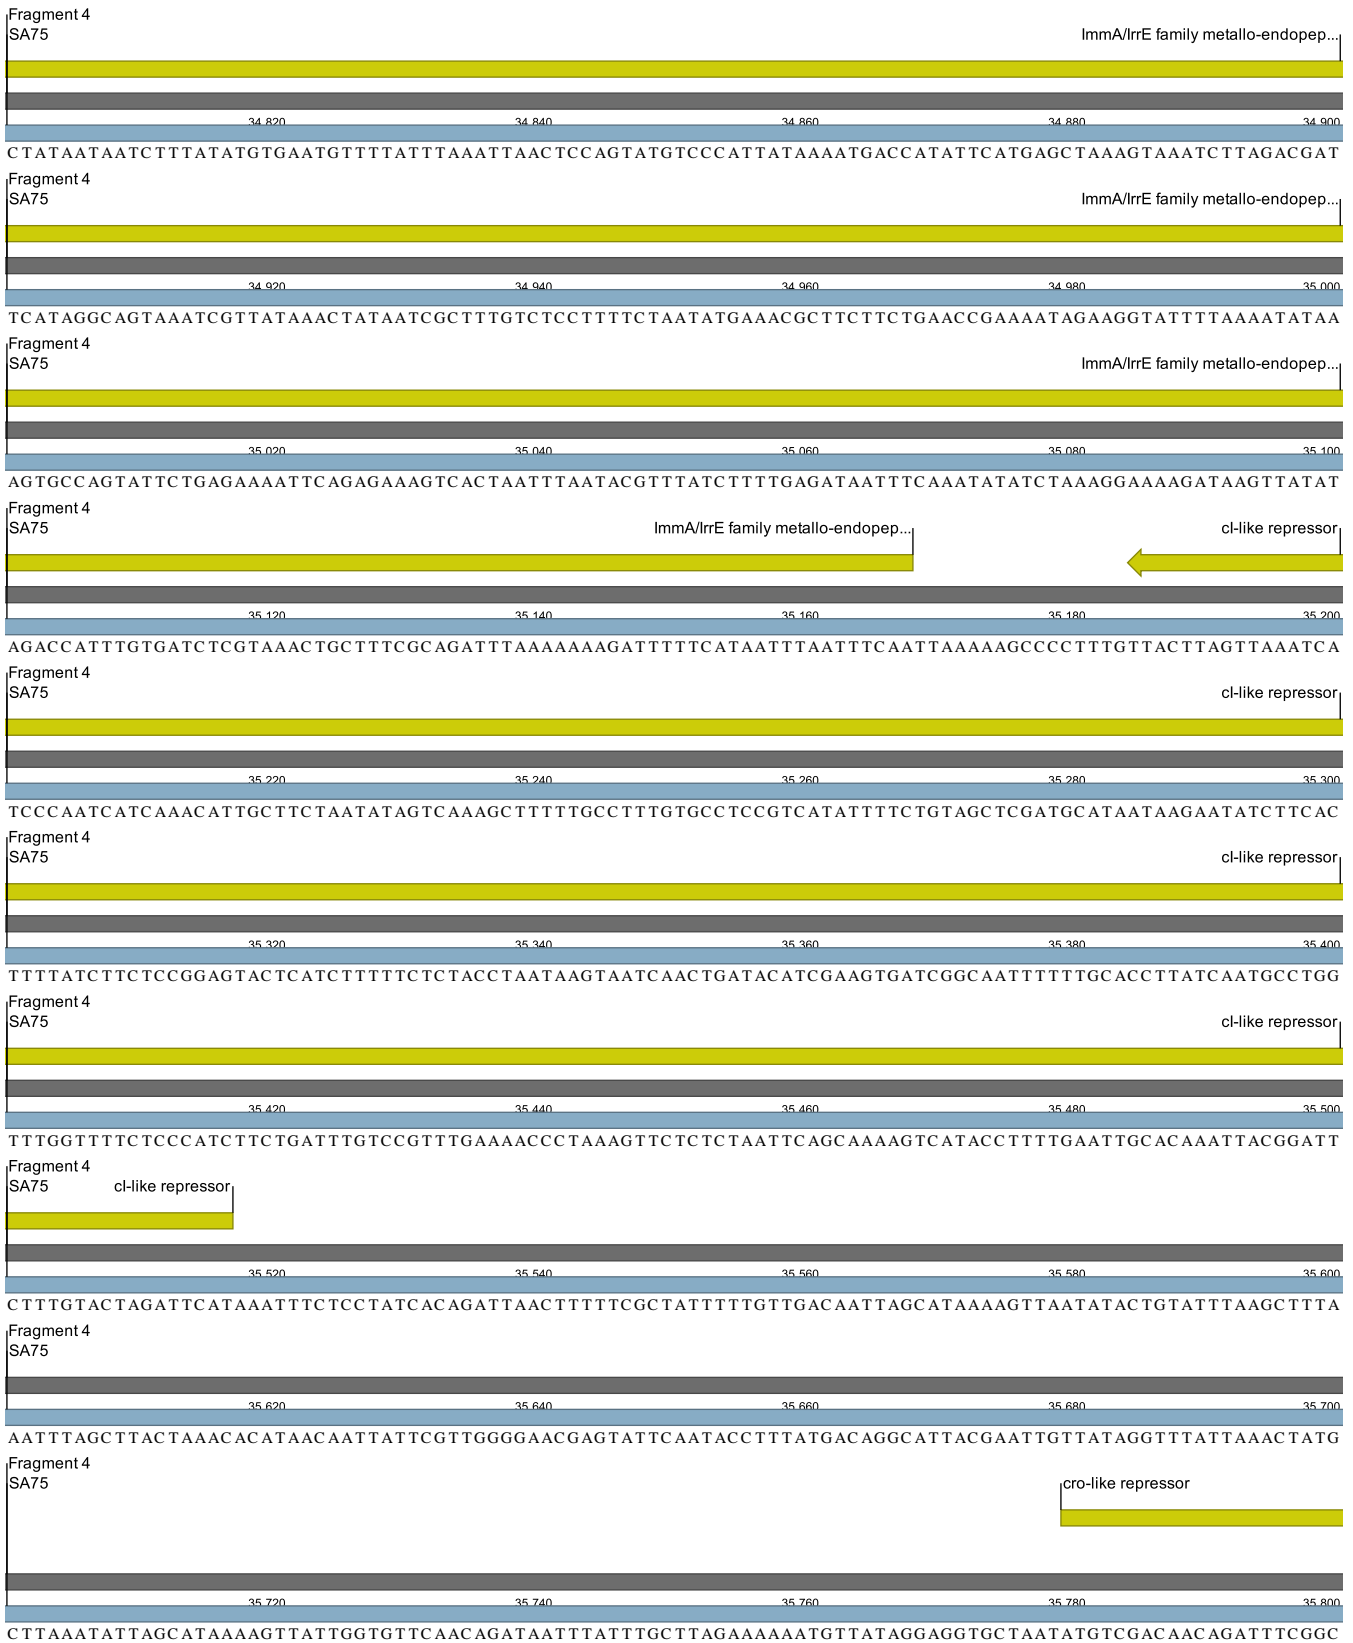

cro-like repressor  
Fragment 4  
SA75

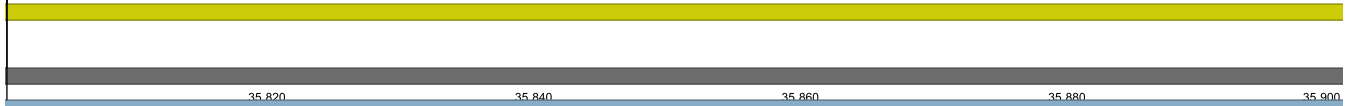

TTGAAAGTGAGAACGGAATTATTAACGC AACATGACAAAC AAGCAACTTGCGGAAATGCTAGAAATTC AAGTGC TACTTATCGGATATTTACGTG

cro-like repressor  
Fragment 4  
SA75

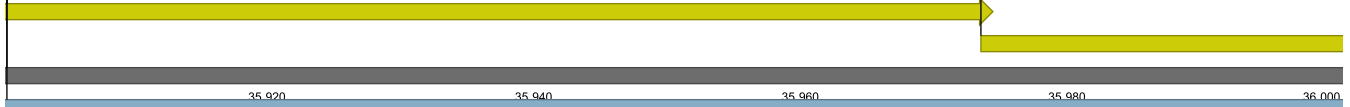

GACGTAGAGATGCTTTTGAACAAAAGAAACGTATTGCGAAAAATTTAGAAATTAAGAAGAGGTGAAGAGTTAATGAATGAAATAAAAC TTTCAGTAAAC

antirepressor protein  
Fragment 4  
SA75

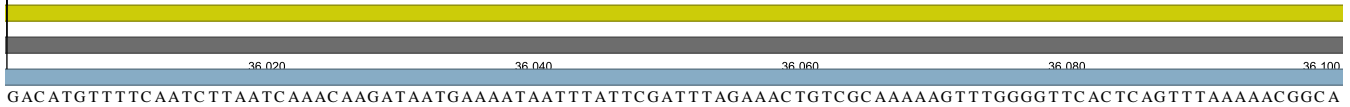

GACATGTTTTCAATCTTAATCAAAC AAGATAATGAAAATAATTTATTTCGATTTAGAAAC TGTCGCAAAAAGTTGGGGTTCAC TCAGTTTAAAAACGGCA

antirepressor protein  
Fragment 4  
SA75

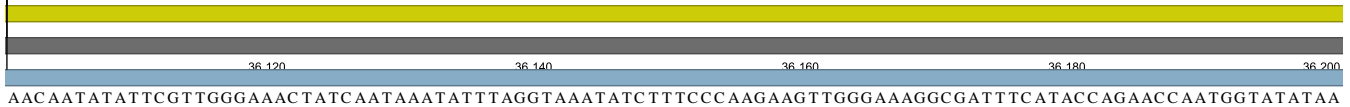

AACAATATATTCGTTGGGAAAC TATCAATAAATATTTAGGTAATATCTTTCCCAAGAAGTTGGGAAAGGCGATTTCATACCAGAACCAATGGTATATAA

antirepressor protein  
Fragment 4  
SA75

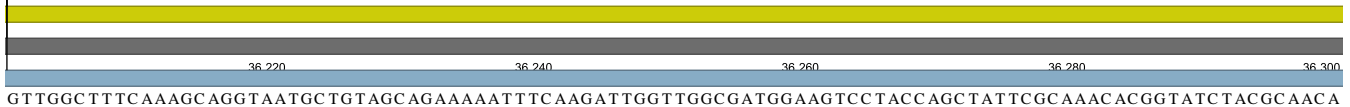

GTTGGCTTTC AAAGCAGGTAATGC TGTAGC AGAAAAATTTCAAGATTGGTTGGCGATGGAAGTCC TACCAGC TATTCGCAACACGGTATCTACGC AACA

antirepressor protein  
Fragment 4  
SA75

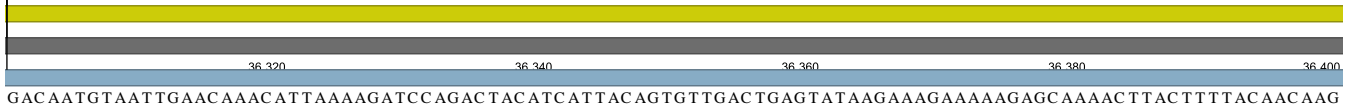

GACAATGTAATTGAACAAACATTAAGATCCAGACTACATCATTACAGTGTGACTGAGTATAAGAAAGAAAAGAGCAAAAAC TTACTTTTACAACAAG

antirepressor protein  
Fragment 4  
SA75

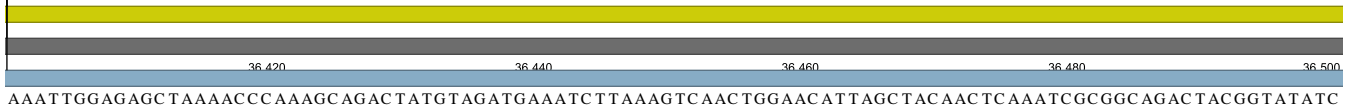

AAATTGGAGAGCTAAAACCAAAGCAGACTATGTAGATGAAATCTTAAAGTCAACTGGAACATTAGCTACAAC TCAAATCGCGGCAGACTACGGTATATC

antirepressor protein  
Fragment 4  
SA75

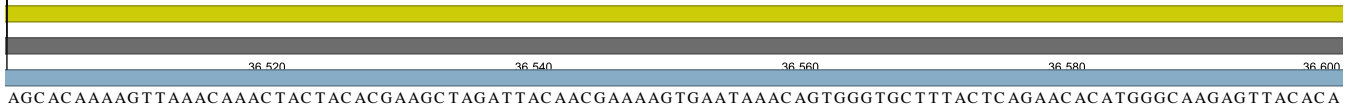

AGCACAAAAGTTAAACAAACTACTACCGAAGCTAGATTACAACGAAAAGTGAATAAACAGTGGGTGCTTTACTCAGAACACATGGGC AAGAGTTACACA

antirepressor protein  
Fragment 4  
SA75

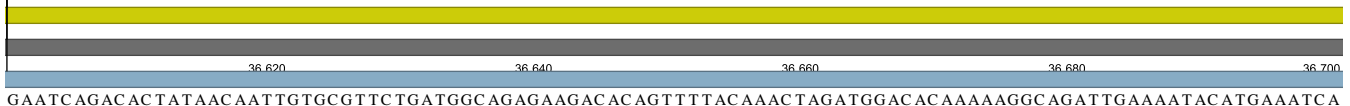

GAATCAGACACTATAACAATTGTGCGTTC TGATGGCAGAGAAGACACAGTTTTACAAACTAGATGGACACAAAAGGCAGATTGAAAATACATGAAATCA

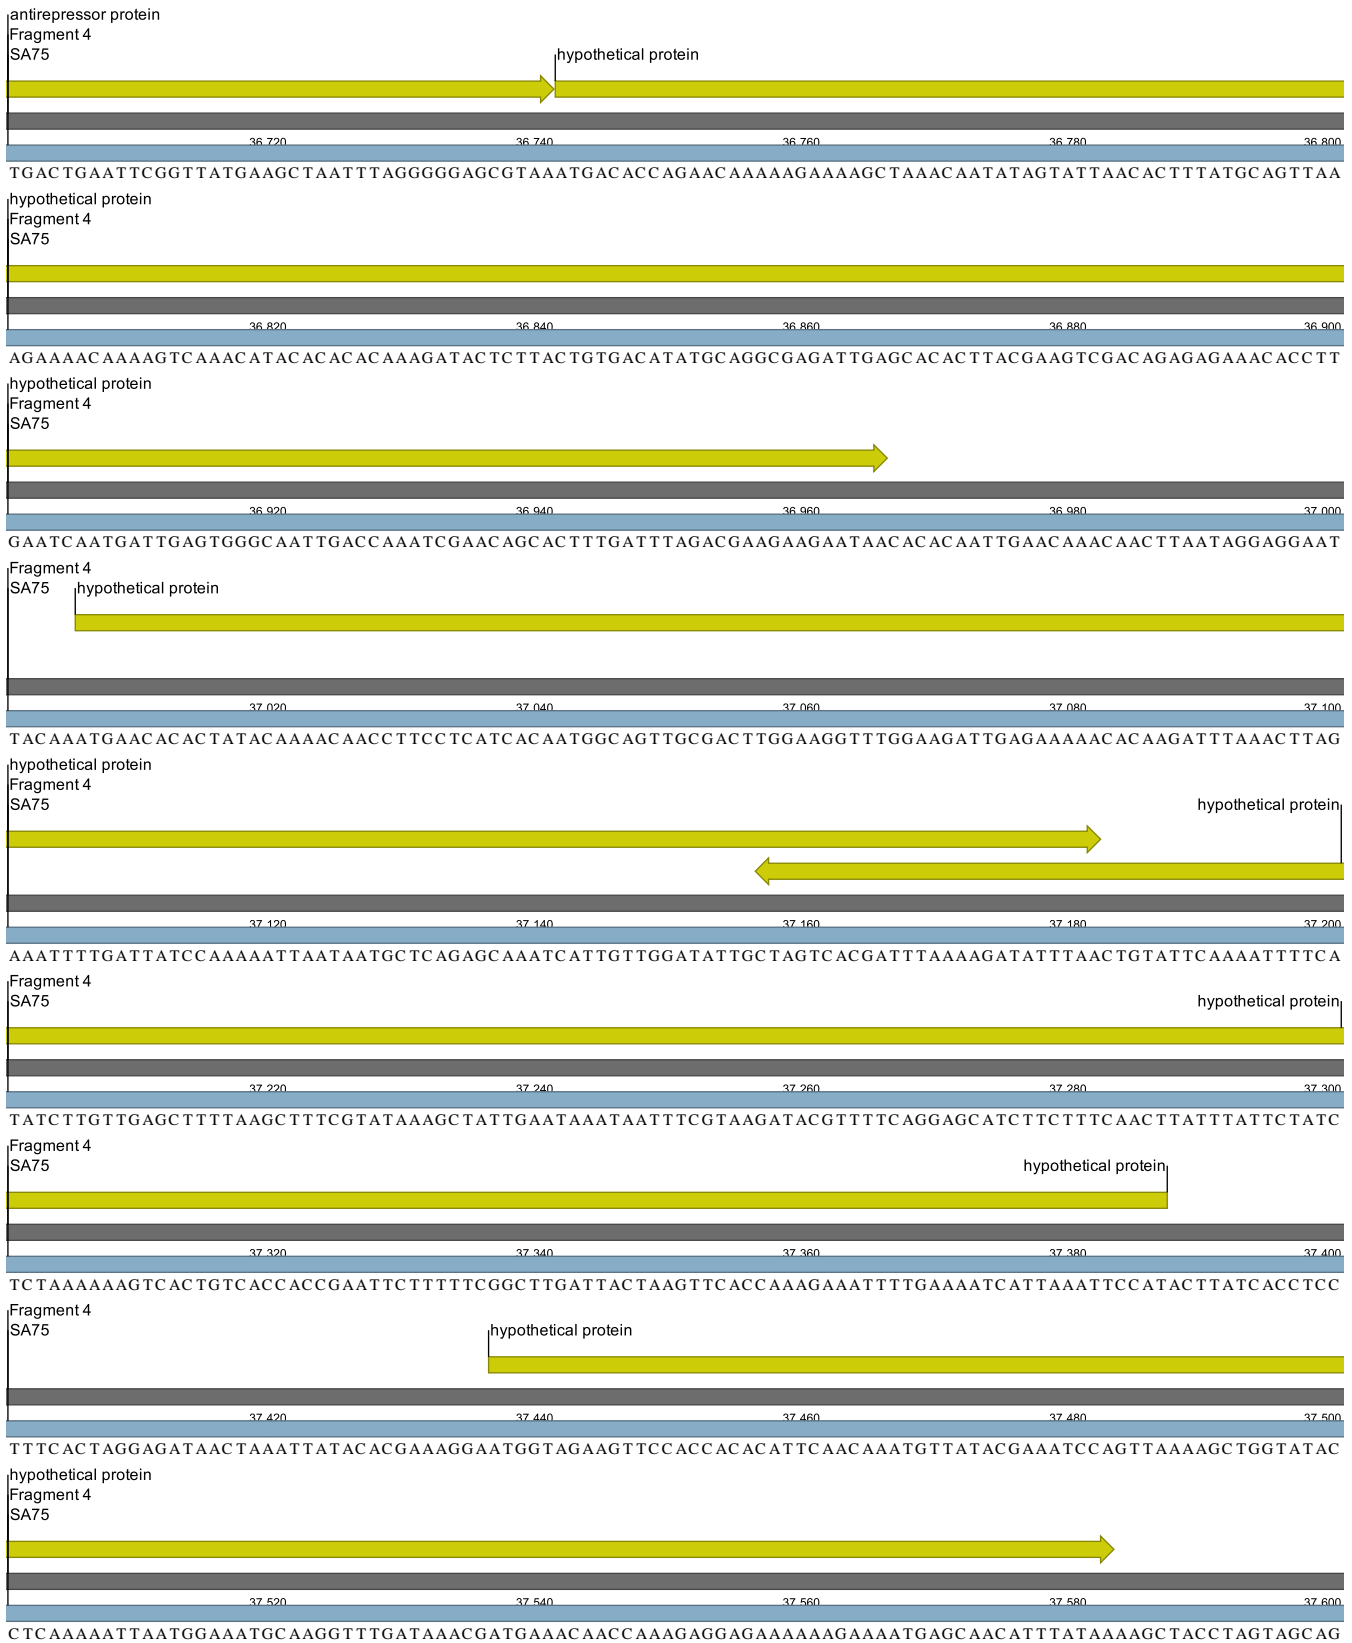

Fragment 4  
SA75

37.620 37.640 37.660 37.680 37.700

TACTATGCTTCACAGTCTTAGCAATTGTGCTTATGCCATTGCTGTACTTCACTACAGCATGGTCAATCGCGGGATTGCAAGTATAGCGACATTCATGTA

Fragment 4  
SA75

37.720 37.740 37.760 37.780 37.800

CTACAAAGAATGCTTTTTCAAGAATAAAAAAAGTCTACTTGTGGAGCAAGTAACAGTATCAAACACTTAAGAAAAATTCATGTTCAATATAAAACG

Fragment 4  
SA75

hypothetical protein

37.820 37.840 37.860 37.880 37.900

AAAAACGGAGGAAGTCAAGATGTATTACGAAATAGGCCAAATCATACGCAAAAAATTCATGTTAACGGATTCGATTTAAGCTATTCATTTTAAAGGT

hypothetical protein

Fragment 4  
SA75

37.920 37.940 37.960 37.980 38.000

CATATGGGCATATCAATACAAGTTAAAGATATGAAC AACGTACCAATTAACATGCTTATGTCGTAGATGAGAATGAC TTAGATATGGCATCAGAC TTAT

hypothetical protein

Fragment 4  
SA75

hypothetical protein

38.020 38.040 38.060 38.080 38.100

TCAACC AAGCAATAGATGAATGGATTGAAAAAACAACAGATGAACAGGACAGACTAATTAACCTTAGTCATGAAATGGTAGAGGGGGATTAAC TAATGGCT

hypothetical protein

Fragment 4  
SA75

38.120 38.140 38.160 38.180 38.200

AATCTATATGAGCTATCAGAAGCATTAAAGAGTTGCTAATCAAGATGAATTAGACCAAACATTATAAAAGATACATTAGATTCATCCAAGCAGAAA

hypothetical protein

Fragment 4  
SA75

38.220 38.240 38.260 38.280 38.300

TGAATGTCAAAGTAGATAACATTGTCAATTGGAGACGTGAAACATTAGGTGACATAGATGTCATAGATAAAGAGATTAAGCGACTTCAAAATTTAAAAA

hypothetical protein

Fragment 4  
SA75

38.320 38.340 38.360 38.380 38.400

ACAAAAACAAAATTTAAC TGATCGATTTAAAAGATTACTTAAAAGAGATGTTAGAAACACAGGAAGTAGATAGTTACCGCACAGCTACTAATCATATTAC

hypothetical protein

Fragment 4  
SA75

38.420 38.440 38.460 38.480 38.500

AAGCGCAAAAACGGGGCTAGTAAAAATATTATCGATGAAAAACTTATTCCAAAGGATTATTGGCTATCACAAAGCCCGAAACTTAATTCTAAGCAACTAA

hypothetical protein  
Fragment 4  
SA75

ERF family protein

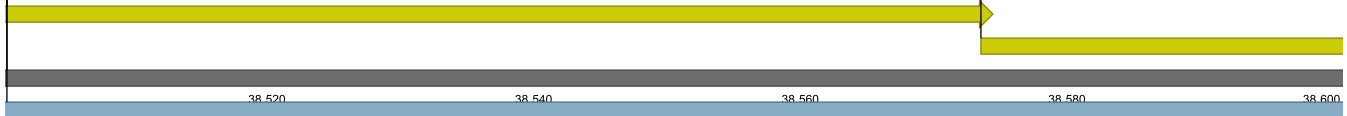

TCGATGATTTGAAAGCTGGGAAAGATATTC CGGCGTTGAAT TAAAGGTAACAGAAAGTC TGGTGATTAAGTGATGAATAAATCGGAAAC AGTTGTTGAA

ERF family protein  
Fragment 4  
SA75

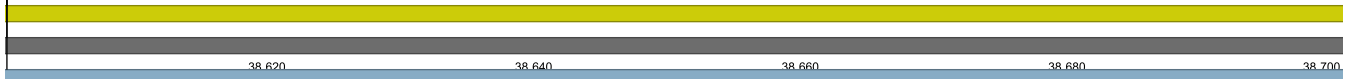

ATAAATAAAGCTATGGTTGCGTTTCGTAAGAAGTAAACAACCGCTCAAAGATAAAAATAATCCATTTTTCAAATCAAAATACGTACCTCTTGAGAACG

ERF family protein  
Fragment 4  
SA75

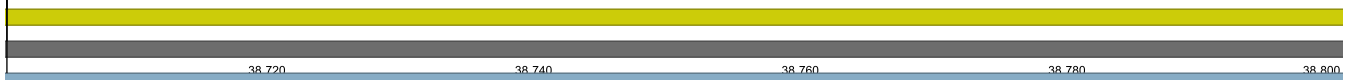

TTGTAG AAGCCATTGACGAGGCGGC AACACCTCATGGACTCTCTTATAC TCAATGGCTTTGAACGATGTAGACGGGC GCGTGGGAGTCGC TACAATGCT

ERF family protein  
Fragment 4  
SA75

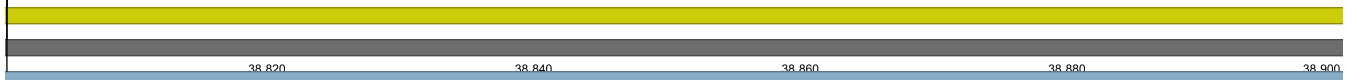

TATGCATGAAAGCGGTGAATATATCGAGTATGATCCTGTATTTATGAATGCAGAAAAGAATACGCCACAAGGCGCAGGCTCGTTAATCAGCTACCTTAAA

ERF family protein  
Fragment 4  
SA75

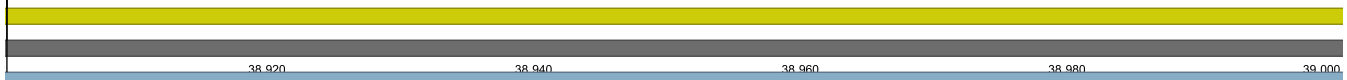

CGTTATTCGCTATCTGCGATTTTCGGTATTACTAGTGATCAAGACGATGATGGAATGAAGCAAGTGGAAAAATAAT AATCCAAAACAACAAACTAGAA

ERF family protein  
Fragment 4  
SA75

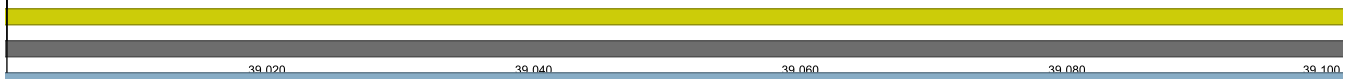

CGCAATGGGC AAGTAGCGAAACTATAGGGATTTAAGGAAAGAGGTTATAAGTTTCTACTAAATTGATAAAGGGCACGGATAAAGAAGCTCCACAAAATAT

ERF family protein  
Fragment 4  
SA75

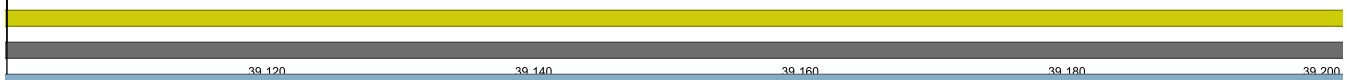

AGTAGAACAAAAATTCGACATAAATAACTATAAATTAACAGAAAAAC AAGCAGCAGAAGCTATTCAAAAATTACGAAAC AACGC AAAAAC AATTACCGGA

ERF family protein  
Fragment 4  
SA75

single-stranded DNA-binding protein

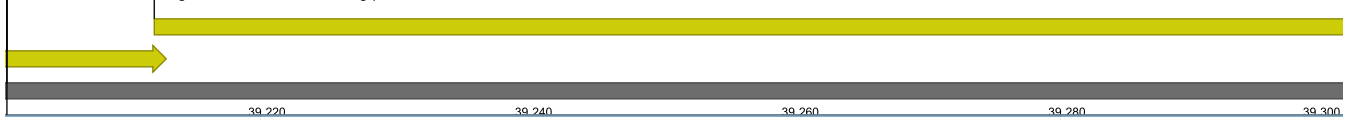

GGAAAACAATAATGTTAAACAGAACAGTATTAGTAGGACGCTTAACAAAAGATCCAGAATATAGAACAGCGCCAAATGGTGTGAGTGTTACCACTTTCAC



single-stranded DNA-binding protein  
Fragment 4  
SA75

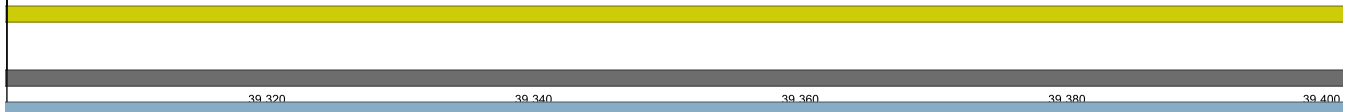

TATCGCAGTTAACAGAACATTTACTAACGC TCAAGGAGAACGTGAGGCAGACTTTATTAAC TGTGTAACTTTAGAAAAC AAGCAGAAAAATGTAAATAAT

single-stranded DNA-binding protein  
Fragment 4  
SA75

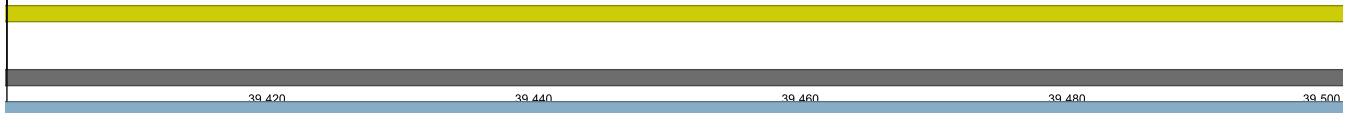

TATTTATCCAAAGGGTCATTGGCTGGCGTTGATGGACGTTTACAATCACGCAGTTATGAAAACAAAGTCGGGCAACGTGTGTTTGTACAGAAGTAGTAG

single-stranded DNA-binding protein  
Fragment 4  
SA75

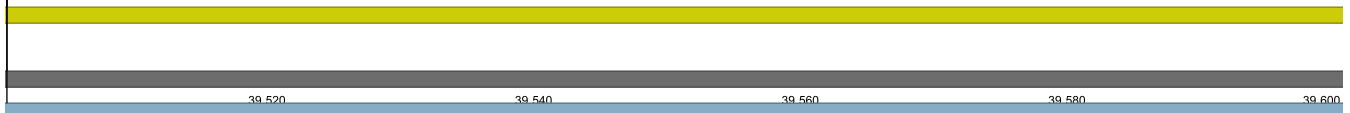

CGGACAGTGTTCAATTC TTAGAACC GAAGAATAGCAACCAAC AACAAAATGACAATTATCAACAAC AAGGACAAGCTCAAACTGGTAATAATCCGTTTGA

single-stranded DNA-binding protein  
Fragment 4  
SA75

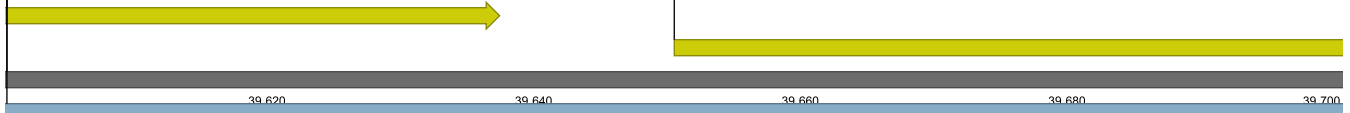

CAATACTGAAGAAGATTTTCAGACCTCCCGTTCGATTGGAATGATTAGATGCCAATAATTACTAGTTATATCACTCAAGATGACGGTACAACAACAGT

hypothetical protein  
Fragment 4  
SA75

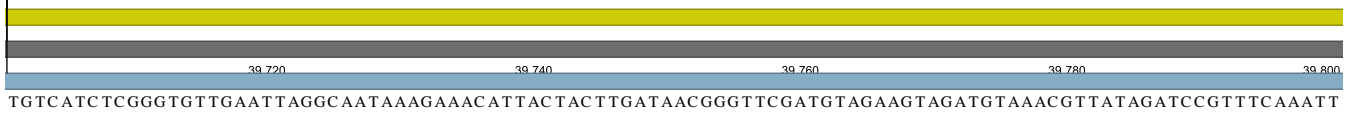

TGTCATCTCGGGTGTGTAATTAGGC AATAAAGAAACATTACTACTTGATAACGGGTTTCGATGTAGAAAGTAGATGTAAACGTTATAGATCCGTTTCAAATT

hypothetical protein  
Fragment 4  
SA75

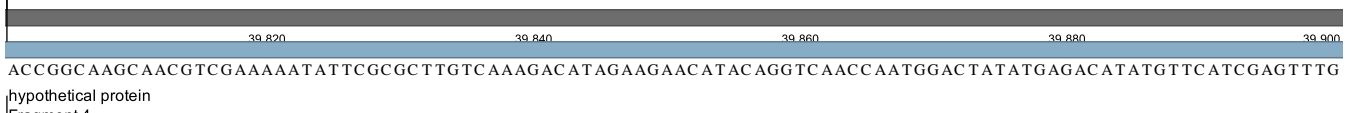

ACCGCAAGCAACGTCGAAAAATATTCGCGCTTGTC AAAGACATAGAAGAACATACAGGTC AACC AATGGACTATATGAGACATATGTTTCATCGAGTTTG

hypothetical protein  
Fragment 4  
SA75

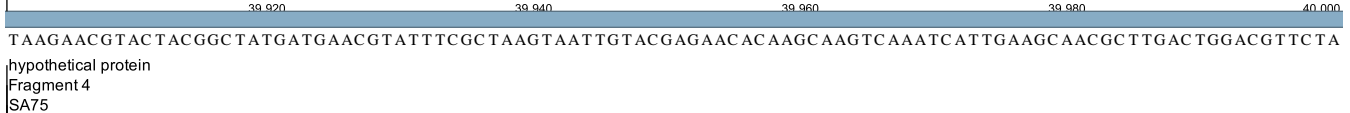

TAAGAACGTACTACGGCTATGATGAACGTATTTTCGCTAAGTAATTGTACGAGAACACAAGCAAGTCAATCATGGAAGCAACGCTTGACTGGACGTTCTA

hypothetical protein  
Fragment 4  
SA75

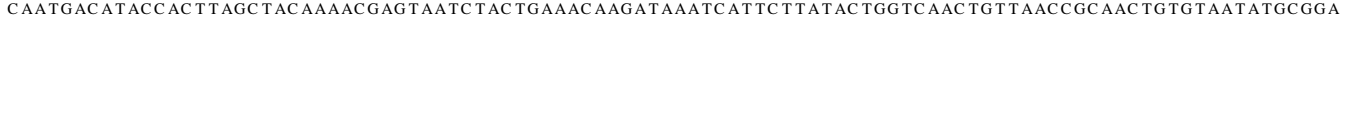

CAATGACATACC ACTTAGCTACAAAACGAGTAATCTACTGAAACAAGATAAATCATCTTATACTGGTCAACTGTTAACC GCAACTGTGTAATATGCGGA

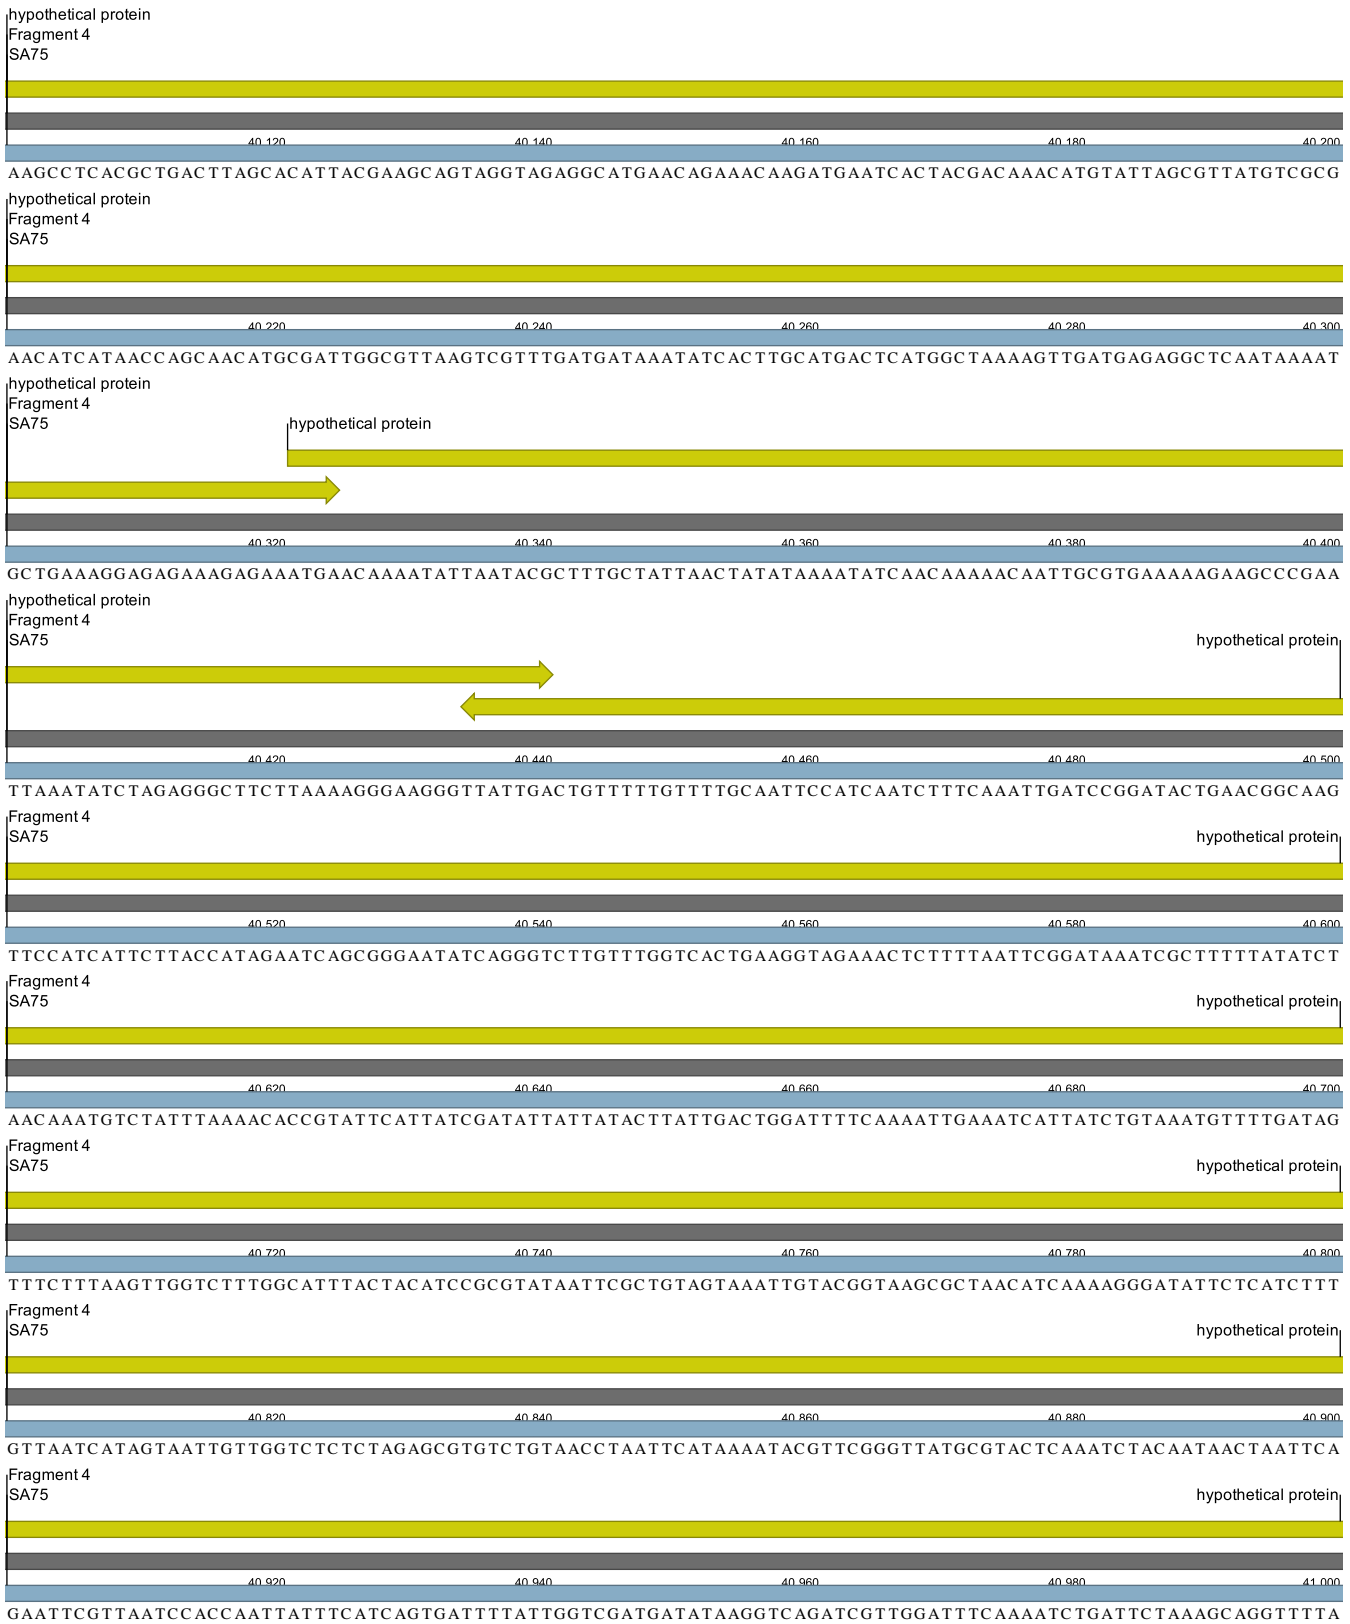

Fragment 4  
SA75

hypothetical protein

41,020 41,040 41,060 41,080 41,100

TGATGGATTGTAAAAGAAAATCAGAGTTTCTTCTTACTTTAGAAATCATCAGTACCTATAGGGCAAGCAATGAAACATTTTTTCAAGTTATTCACCTCCTAA

Fragment 4  
SA75

replication initiation protein

41,120 41,140 41,160 41,180 41,200

TCATATTTTATTAATTATAACAGAAAGGAGATAACGAAATGGCAACATTTAGAACGATAAAAAGAAAGTGGCGATTTTGTAACTGTGCATAAATCTTTTG

replication initiation protein

Fragment 4  
SA75

41,220 41,240 41,260 41,280 41,300

TGTTCCGATAGTAATTTAAGTGCTAAAGCTAAAGGGATATTATGTATTTCCTAAGTCGTCCGACAAATGGCAAAATACACGTCAGAAGTAGTTAAACA

replication initiation protein

Fragment 4  
SA75

41,320 41,340 41,360 41,380 41,400

TATGAATGATGGACAAAAATCAATCAATAGTGGCGTTCAAGAACCTATGGATAAATAATATGTTTCACAGAATACAAAAAGAGCTGAAAACGGTGTGTTT

replication initiation protein

Fragment 4  
SA75

41,420 41,440 41,460 41,480 41,500

AAAGGTTTGAATACTTAGTTTACGAAAAACCAACCGAAATGCCATTTTCGGAAAACGGATTATCGGCAACGGGTTTTCGGAAAACGGAAAAACGGAAA

replication initiation protein

Fragment 4  
SA75

41,520 41,540 41,560 41,580 41,600

ACCGAAAAGGGCGTACTACTAATAATAATAGTACTAATAATGATTTAACTAATAATAACAATACTAATAATGATGGAAGTATATTGTCGGGCAACCCGAC

replication initiation protein

Fragment 4  
SA75

41,620 41,640 41,660 41,680 41,700

TGTGTATTCCATTCCCTATAAAGAAATTATCGAATACTTAAACAAAAAACAGGAAAGCATTTTAAACACAATACAGCTAAATCAAAAGATTTTATTAA

replication initiation protein

Fragment 4  
SA75

41,720 41,740 41,760 41,780 41,800

GCAAGATGGAATCAAGATTTTAGGTTGGAGGATTTTAAAAAGGTGATTGATATCAAAACAGCTGAGTGGCTAAACACGGATAGCGATAAATACCTTAGAC

replication initiation protein

Fragment 4  
SA75

41,820 41,840 41,860 41,880 41,900

CAGAAACACTTTTGGCAATAAATTGAGGGGTACCATAATCAAAAAGCGCAACCAACTGGCATAGATCAATTGGAACGCATGAAGTACGACGAAAAGTTA

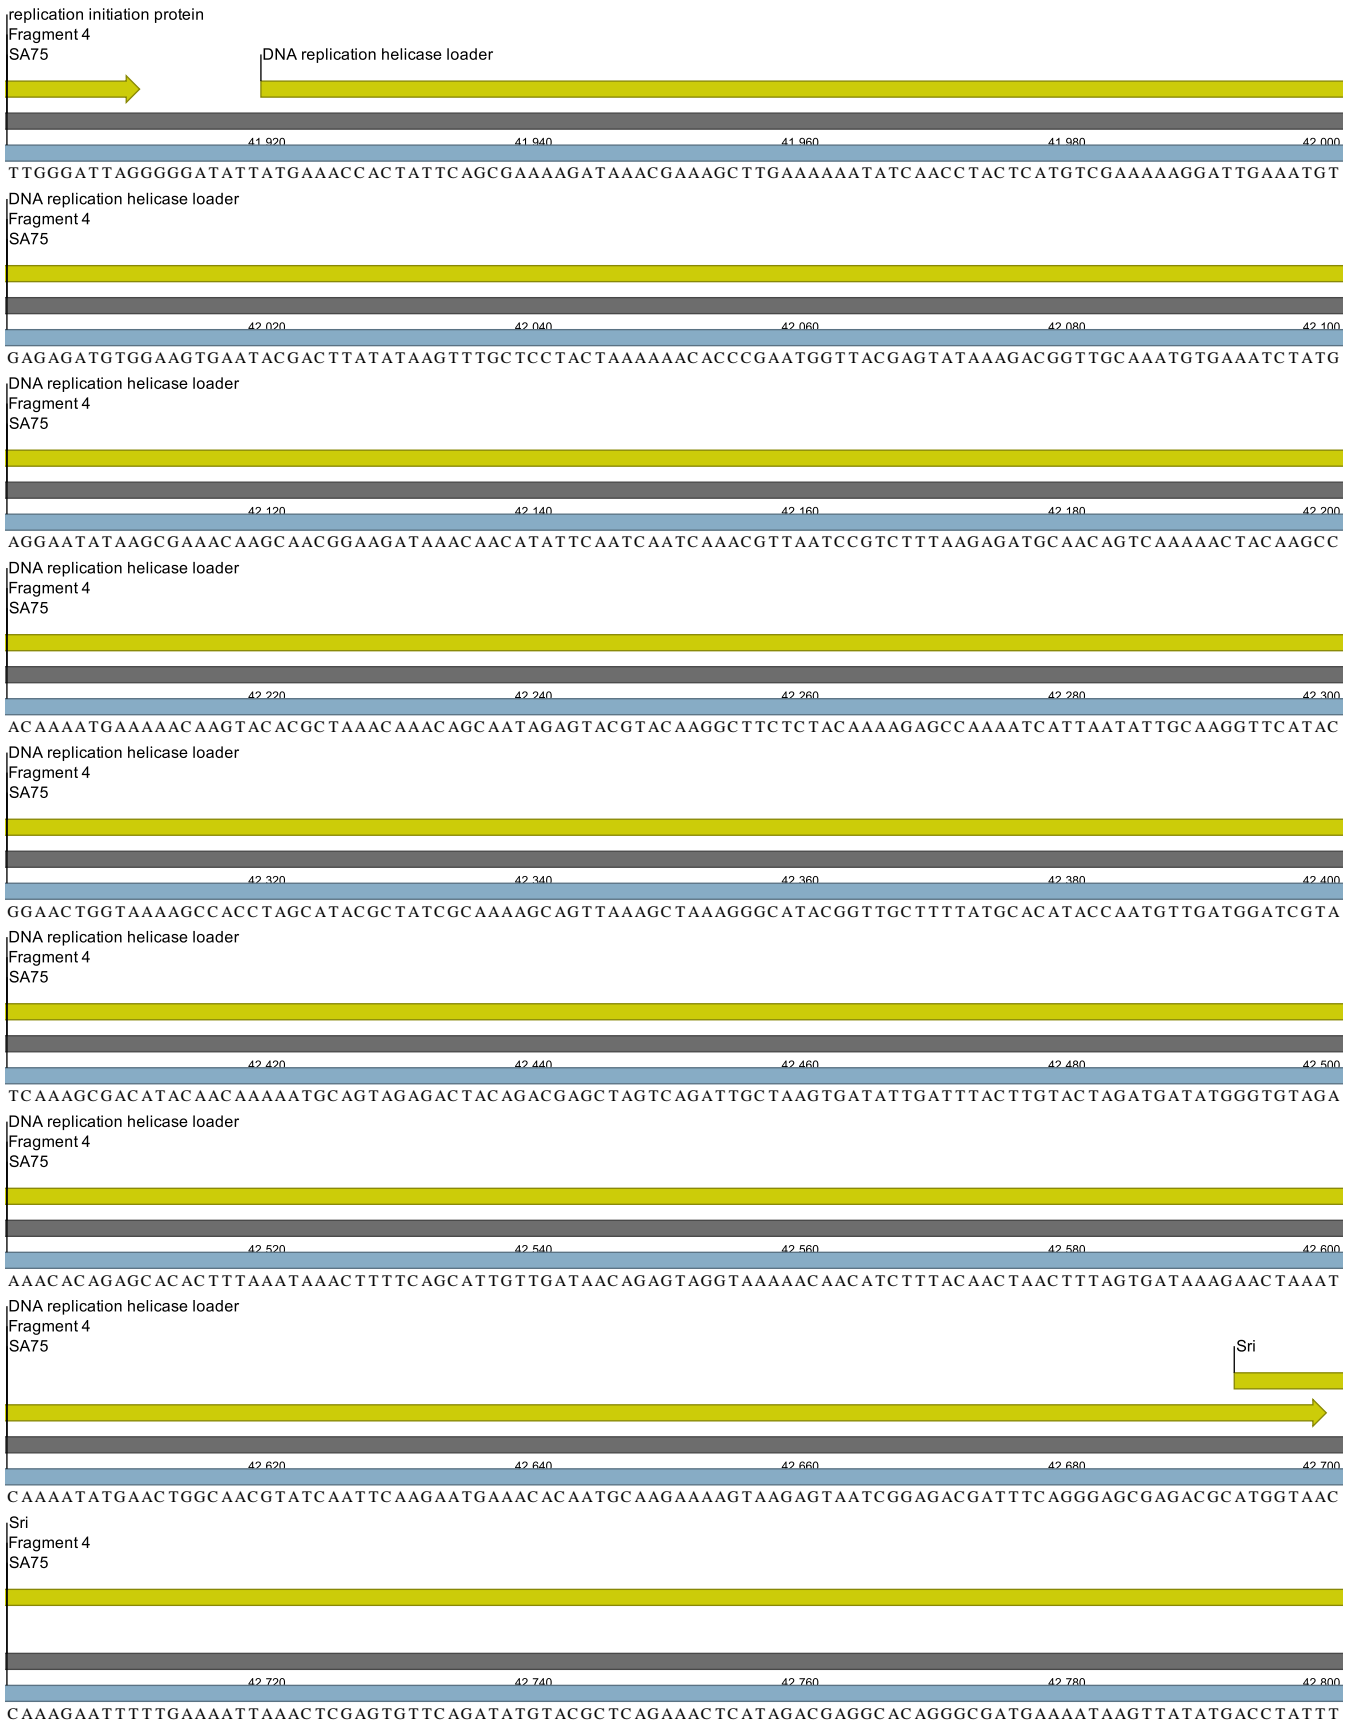

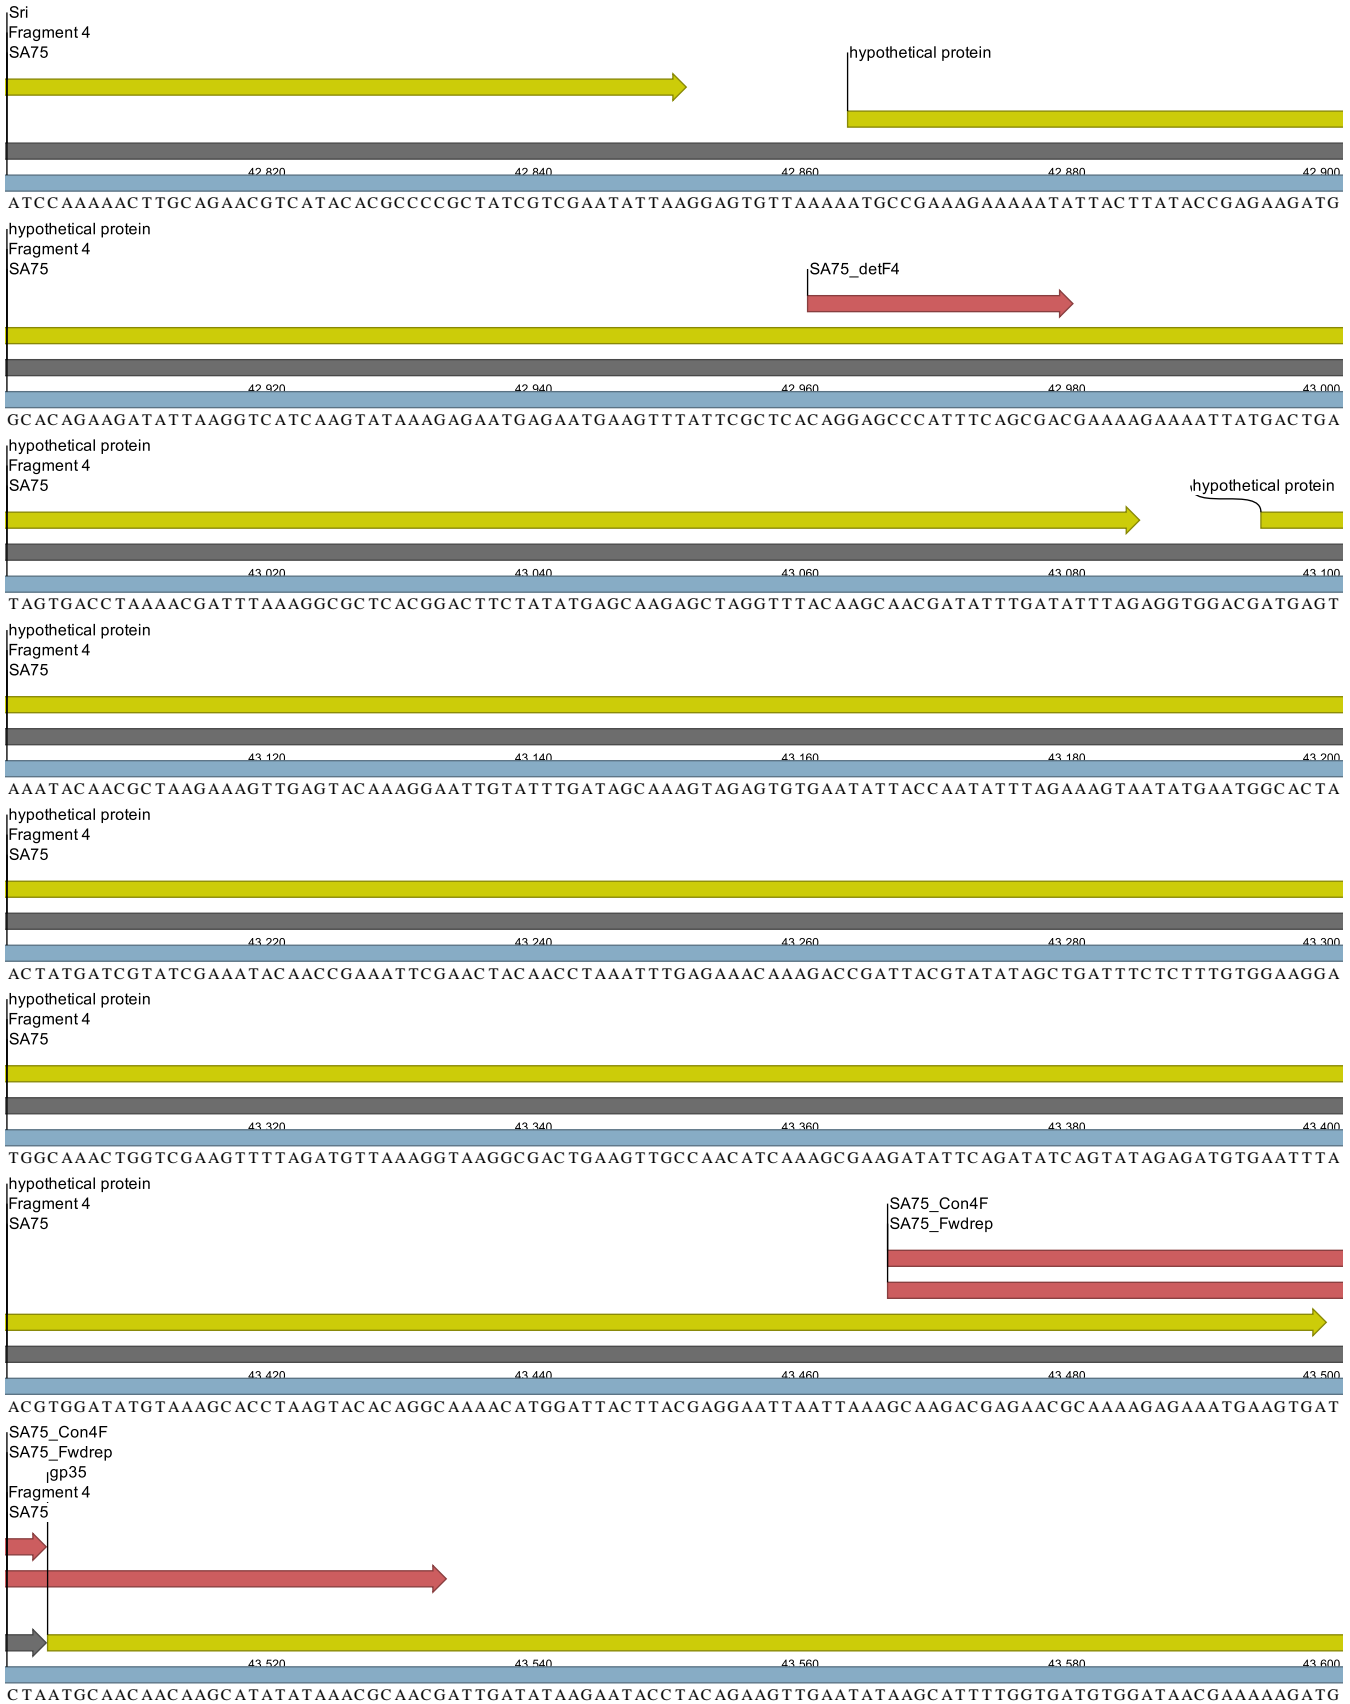

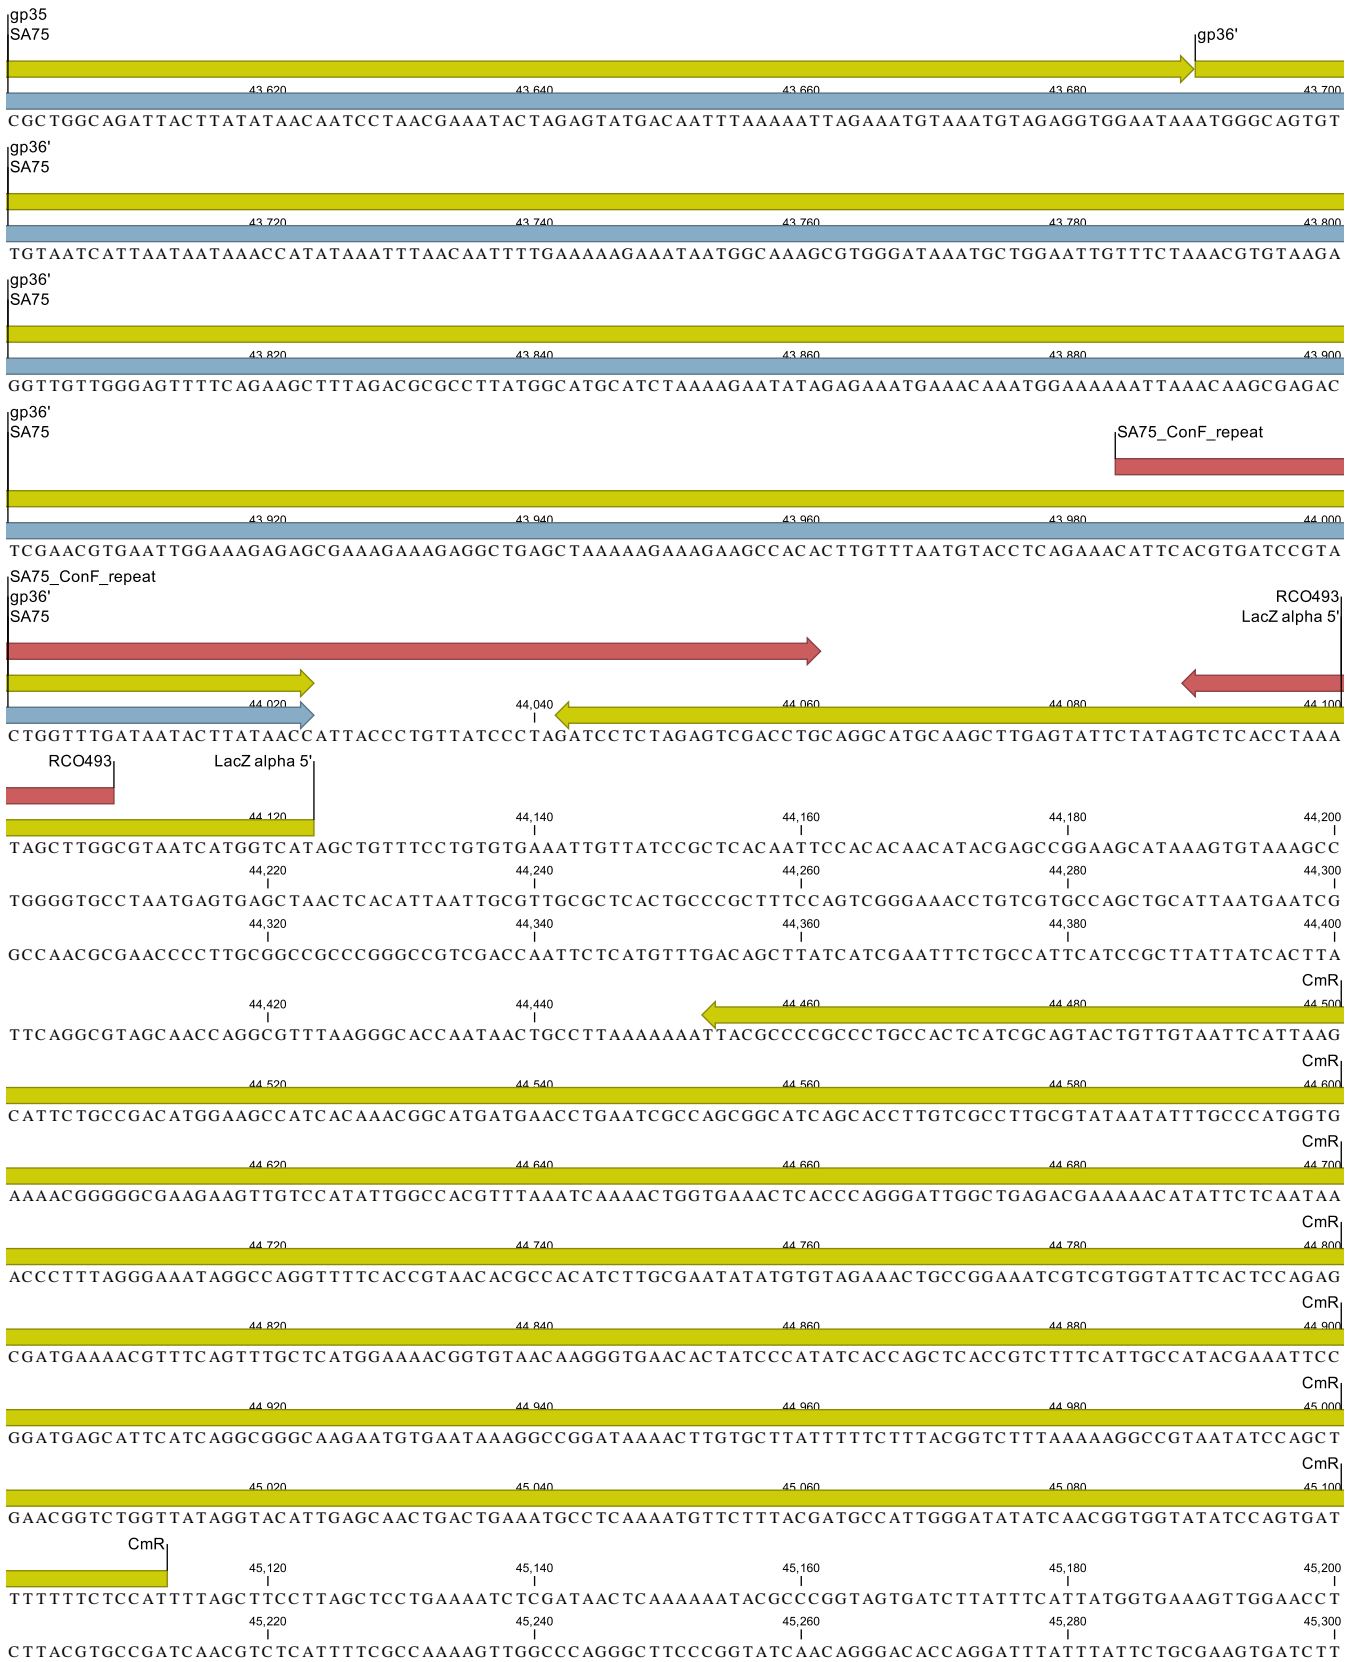

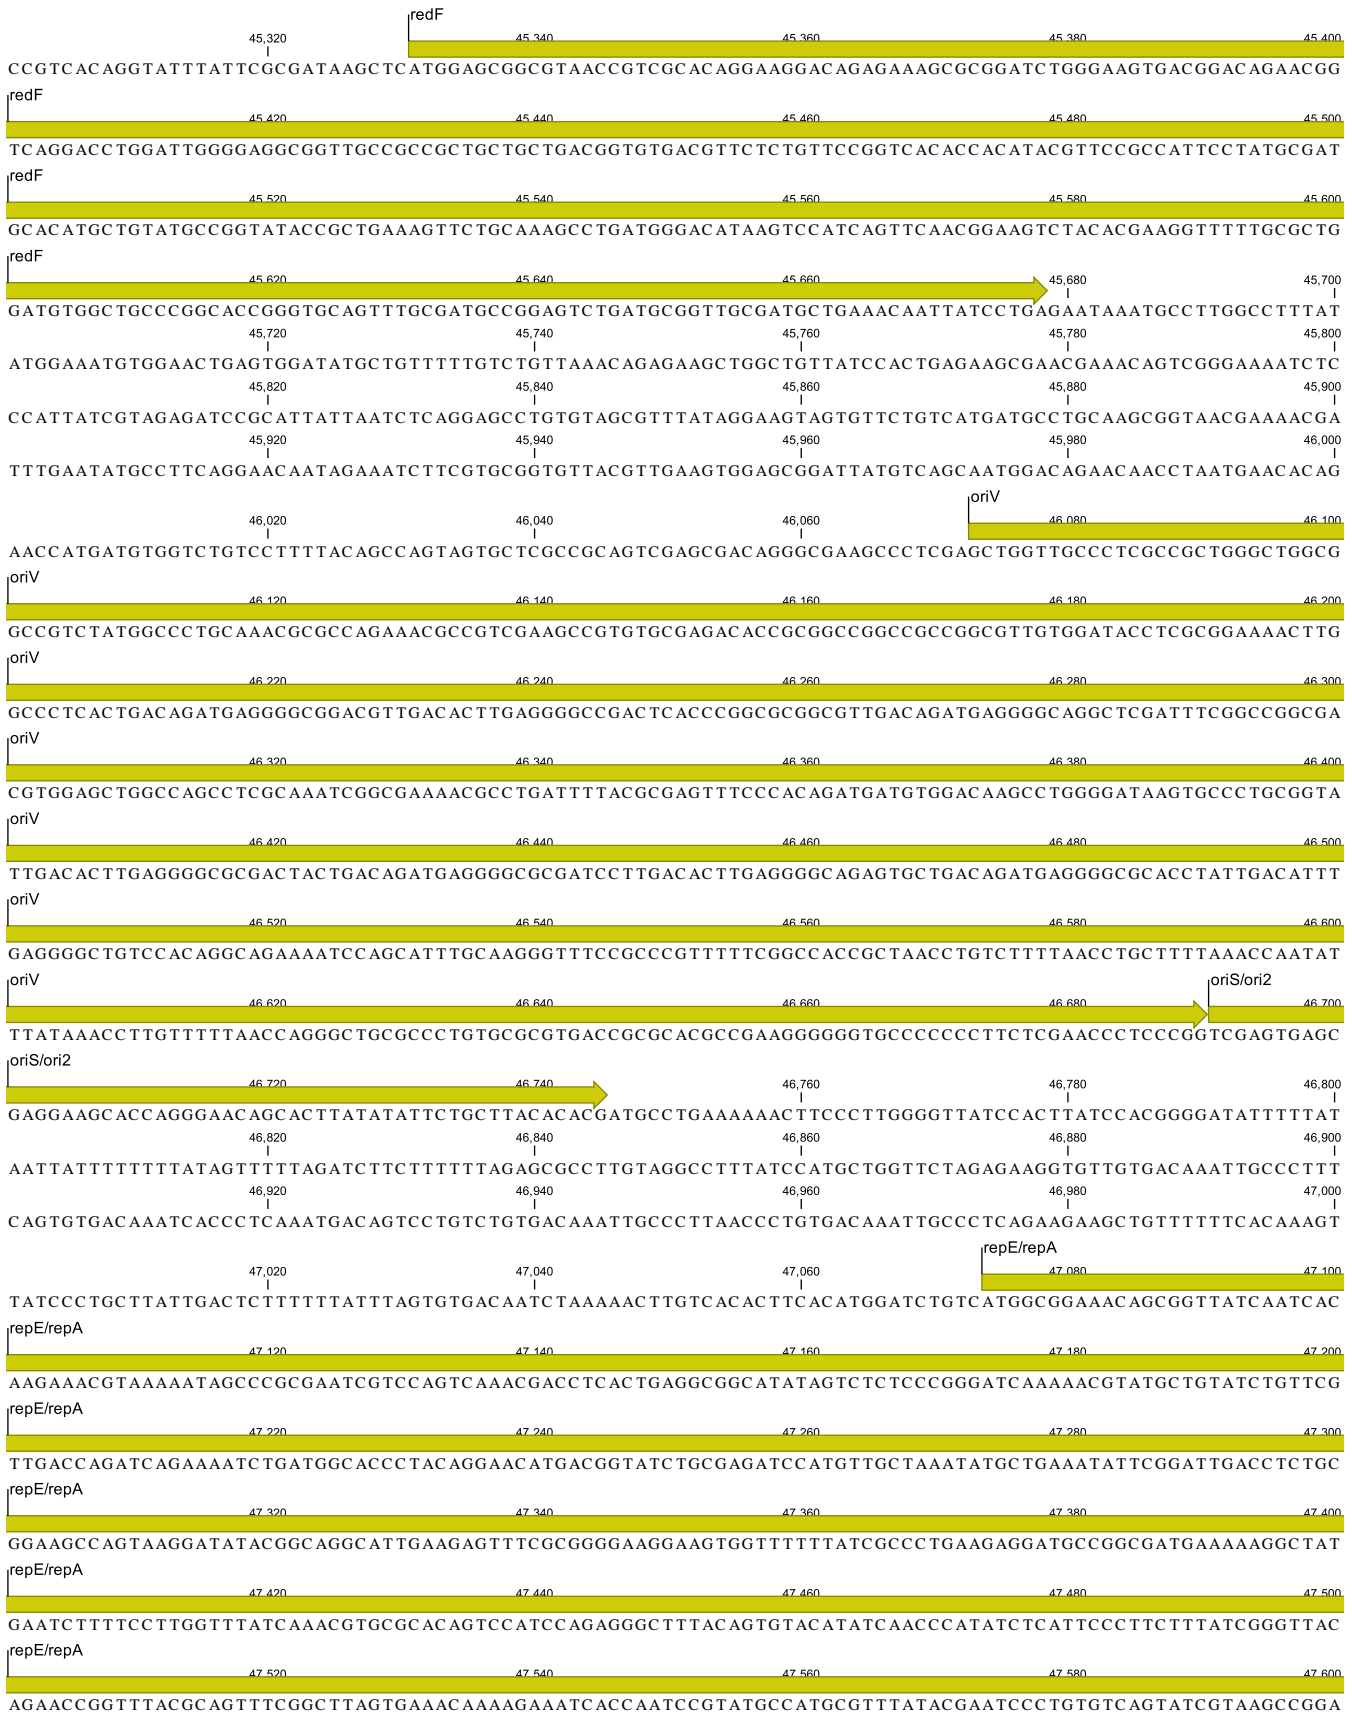

repE/repA  
47,620 47,640 47,660 47,680 47,700  
TGGCTCAGGCATCGTCTCTCGAAAATCGACTGGATCATAGAGCGTTACCAGCTGCCTCAAAGTTACCAGCGTATGCC TGACTCCGCCGCCGCTTCTGTG

repE/repA  
47,720 47,740 47,760 47,780 47,800  
CAGGTCGTGTTAATGAGATCAACAGCAGAACTCCAATGCGCTCTCATACATTGAGAAAAAGAAAGGCCAGAGACTCATATCGTATTTTCTCTCC

repE/repA  
47,820 47,840 47,860 47,880 47,900  
GCGATATCACTTCCATGACGACAGGATAGTCTGAGGGTTATCTGTCACAGATTGAGGGTGGTTCGTCACATTGTTCTGACCTACTGAGGGTAATTGTG

47,920 47,940 47,960 47,980 48,000  
CACAGTTTGTGTTTCCCTTCAGCCTGCATGGATTTTCATACTTTTTGAACTGTAATTTTAAAGGAAGCCAAATTTGAGGGCAGTTTGTACAGTTGA

48,020 48,040 48,060 48,080 48,100  
TTTCTTCTCTTTCCCTTCGTCATGTGACCTGATATCGGGGTTAGTTCGTCATCATTGATGAGGGTTGATTATCACAGTTTATTACTCTGAATTGGCTA

48,120 48,140 48,160 48,180 48,200  
TCCGCGTGTGTACCTTACCTGGAGTTTTTCCACGGTGGATTTCTTCTTTCGCTGAGCGTAAGAGCTATCTGACAGAACAGTTCTTCTTTGCTTCTT

48,220 48,240 48,260 48,280 48,300  
CGCCAGTTCGCTCGCTATGCTCGGTTACACGGCTGCGGCGAGCATCACGTGCTATAAAAAATAATTATAATTTAAATTTTTTAATATAAATATATAAATTA

CEN6  
48,320 48,340 48,360 48,380 48,400  
AAAAAGAAAAGTAAAAAAGAAATTAAGAAAAAATAGTTTTTGTGTTTCCGAAGATGTAAAAGACTCTAGGGGGATCGCCAAACAATACTACCTTTTATC

ARSH4  
48,420 48,440 48,460 48,480 48,500  
TTGCTCTTCCGCTCTCAGGTATTAATGCCGAATTGTTTCATCTTGTCGTGTAGAAGACCACACAGAAAATCCGTGATTTTACATTTTACTTATCGT

ARSH4  
48,520 48,540 48,560 48,580 48,600  
TAATCGAATGTATATCTATTTAATCTGCTTTTCTTGTC TAATAAATATATATGTAAGTACGCTTTTTGTTGAAATTTTTTAAACCTTTGTTATTTTTT

ARSH4  
48,620 48,640 48,660 48,680 48,700  
TTTCTTCAATCCGTAACCTTCTTACCTTCTTTATTTACTTTCTAAAATCCAAATACAAAACATAAAAAATAAATAAACACAGAGTAAATTTCCCAAATATT

ARSH4  
48,720 48,740 48,760 48,780 48,800  
CCATCATTA AAAAGATACGAGGCGGTGTAAGTTACAGGCAAGCGATCCGCTAAGAAACCATTATTATCATGACATTAACCTATAAAAAATAGGCGTATCA

48,820 48,840 48,860 48,880 48,900  
CGAGGCCCTTTGCTCGCGCGTTCGGTGATGACGGTGAAAACCTCGACACATGCAGCTCCCGGAGACGGTACAGCTTGTCTGTAAGCGGATGCCGG

48,920 48,940 48,960 48,980 49,000  
GAGCAGACAAGCCGTCAGGCGCGTACGCGGTGTTGGCGGGTGTGCGGGCTGGCTTAACATGCGGCATCAGAGCAGATTGTACTGAGAGTGCACCAT

49,020 49,040 49,060 49,080 49,100  
ACCACCTTTTCAATTCATCATTTTTTTTTTATTCTTTTTTTTGATTTCCGTTTCTTGAATTTTTTTTGATTCGGTAATCTCCGAACAGAAGGAAGAAGC

49,120 49,140 49,160 49,180 49,200  
AAGGAAGGAGCACAGACTTAGATTGGTATATATACGCATATGTAGTGTGAAGAAACATGAAATGCCCAGTATTCTTAACCCAACTGCACAGAACAAAA

49,220 49,240 49,260 49,280 49,300  
ACCTGCAGGAAACGAAGATAAATCATGTCGAAAGCTACATATAAGGAACGTGCTGCTACTCATCCAGTCCGTTGCTGCCAAGCTATTTAATATCATGC

URA3  
49,320 49,340 49,360 49,380 49,400  
ACGAAAAGCAAACAACAACTTGTGTGCTTCATTGGATGTTCTGTAACCAAGGAATTACTGGAGTTAGTTGAAGCATTAGGTCCCAAAATTTGTTTACTAAA

URA3  
49,420 49,440 49,460 49,480 49,500  
AACACATGTGGATATCTTGACTGATTTTTCCATGGAGGGCACAGTTAAGCCGCTAAAGGCATTATCCGCCAAGTACAATTTTTACTCTTCAAGACAGA

URA3  
49,520 49,540 49,560 49,580 49,600  
AAATTTGCTGACATTGGTAATACAGTCAAATGCACTCTGCGGGTGTATACAGAATAGCAGAATGGGCAGACATTACGAATGCACACGGTGTGGTGG

URA3  
49,620 49,640 49,660 49,680 49,700  
GCCAGGTATTGTTAGCGGTTTGAAGCAGGCGGCAAGAAGTAACAAGGAACCTAGAGGCCTTTTGATGTTAGCAGAATTGTCATGCAAGGC TCCCT

URA3  
49,720 49,740 49,760 49,780 49,800  
ATCTACTGGAGAATATACTAAGGGTACTGTTGACATTGCGAAGAGCGACAAGATTTTGTATCGGCTTTATTGCTCAAAGAGACATGGGTGGAAGAGAT

URA3  
49,820 49,840 49,860 49,880 49,900  
GAAGGTTACGATTGGTTGATTATGACACCCGGTGTGGGTTTAGATGACAAGGGAGACGCTATGGGTC AACAGTATAGAACCCTGGATGATGTGGTCTCTA



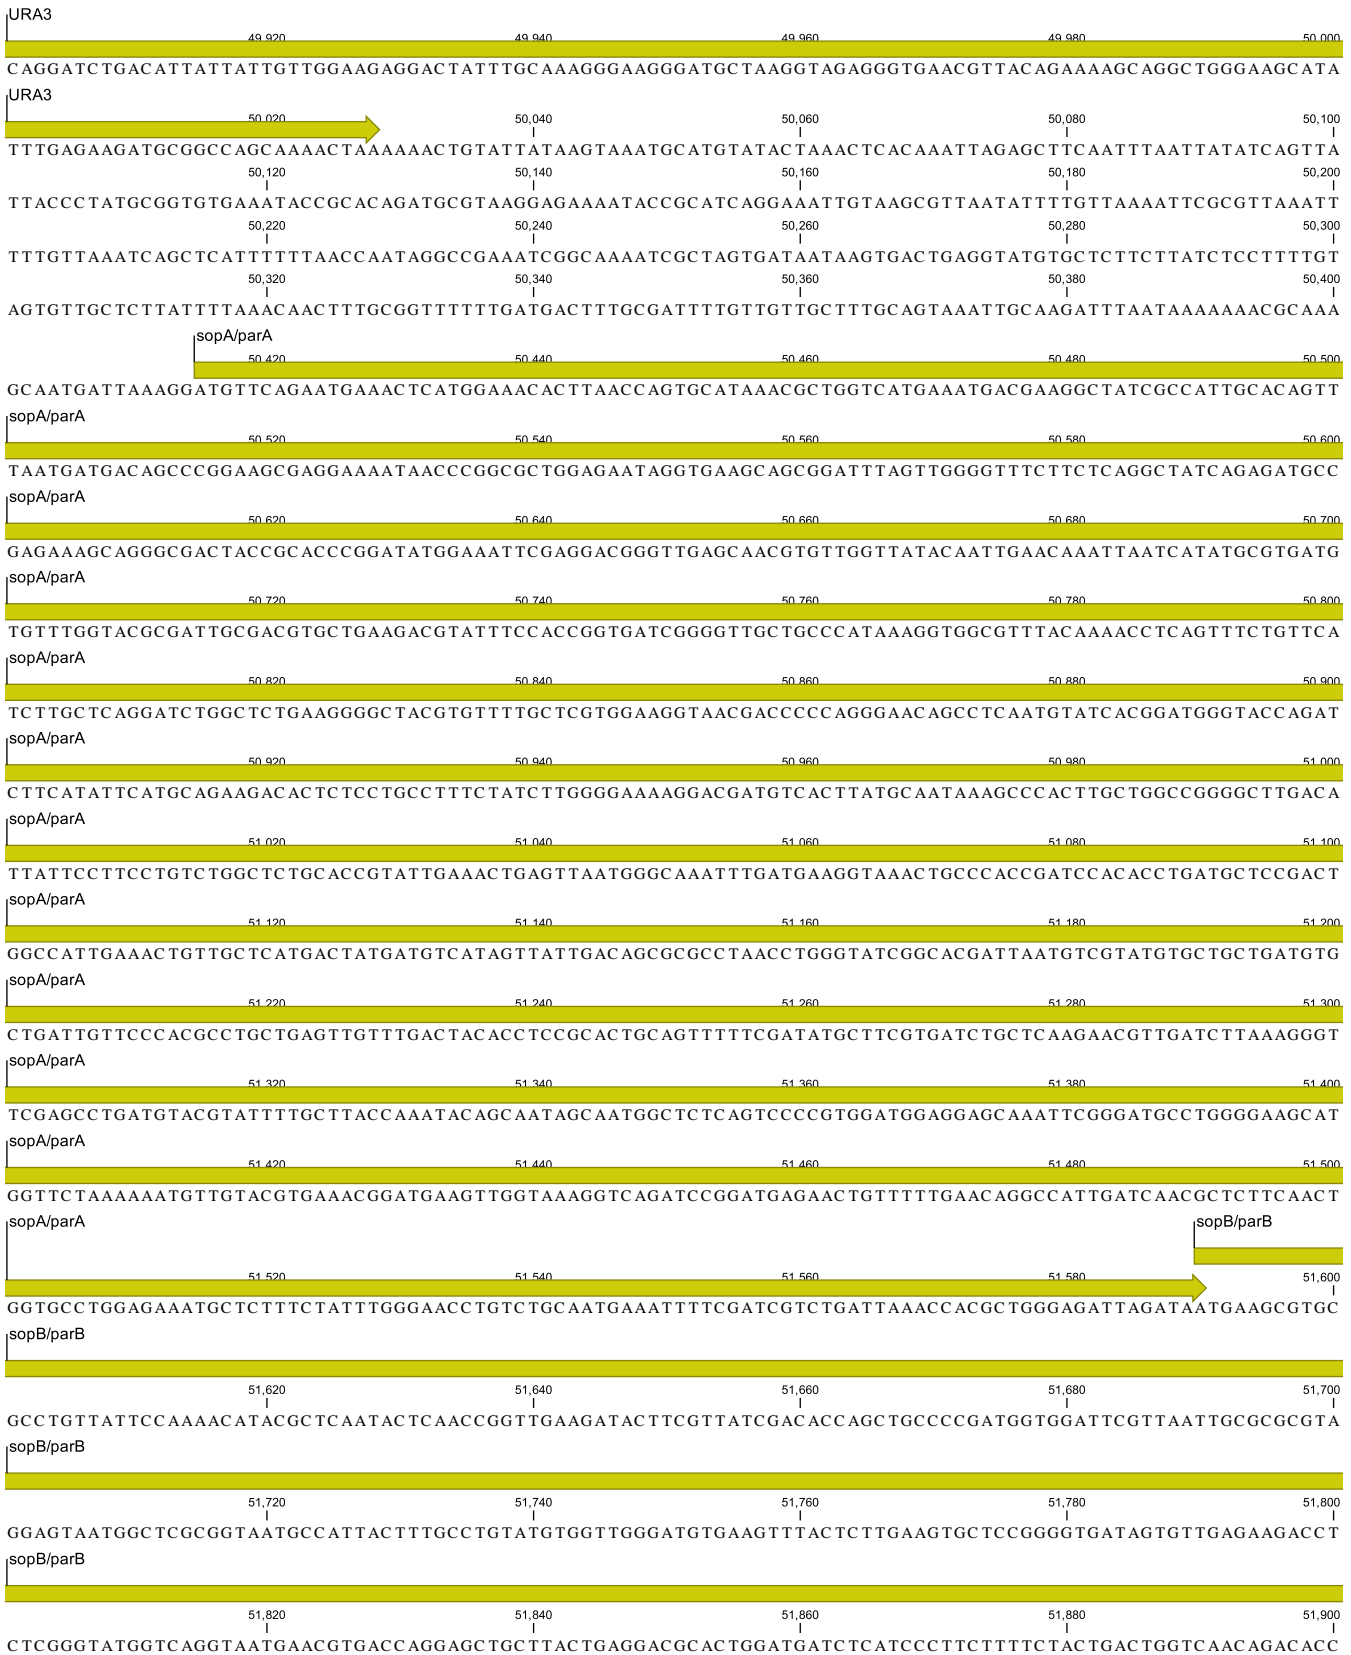

sopB/parB

GGCGTTCGGTCGAAGAGTATCTGGTGTCTATAGAAATTGCCGATGGGAGTCGCCGTCGTAAGCTGCTGCACCTACCGAAAAGTGATTATCGTGTTCGGTT

sopB/parB

GGCGAGCTGGATGATGAGCAGATGGCTGCATTATCCAGATTGGGTAACGATTATCGCCAAACAAGTGCATTATGAACGTGGTCAGCGTTATGCAAGCCGAT

sopB/parB

TGCAGAATGAATTTGCTGGAAAATTTCTGCGCTGGCTGATGCGGAAAAATTTTCACGTAAGATTATTACCCGCTGTATCAACACCGCCAAATTGCCATA

sopB/parB

ATCAGTTGTTGCTCTTTTTCTCACCCCGTGAACATCTGCCCGGTCAGGTGATGCACCTCAAAAAGCCTTTACAGATAAAGAGGAATTACTTAAGCAG

sopB/parB

CAGGCATCTAACCTTCATGAGCAGAAAAAGCTGGGGTGATATTTGAAGCTGAAGAAGTTATCACCTTTTAACTTCTGTGCTTAAAACGTCATCTGCAT

sopB/parB

CAAGAAC TAGTTAAAGCTACGACATCAGTTTGCCTCGAGCGACAGTATTGTATAAGGGCGATAAAATGGTGCTTAACTGGACAGGTCCTCGTGTTC

sopB/parB

AACTGAGTGTATAGAGAAAATGAGGCCATCTTAAGGAAC TTGAAAAGCCAGCACCTGATGCGACC TCGTTTTAGTCTACGTTTATCTGCTTTACTT

AATGTCTTTGTTACAGGCCAGAAAGCATAACTGGCTGGAATTTCTCTCGGGCCACTGTTCCACTTGTATCGTCGGTCTGATAATCAGACTGGGACC

ACGGTCCCAC TCGTATCGTCGGTCTGATTATTAGTCTGGGACCACGGTCCCAC TCGTATCGTCGGTCTGATTATTAGTCTGGGACCACGGTCCCAC TCGT

GTTGTCTGGTCTGATTATCGGTCTGGGACCACGGTCCCAC TTGTATTGTCGATCAGACTATCAGCGTGAGACTACGATTCCATCAATGCCGTCAAGGGCA

AGTATTGACATGTCGTCGTAACCTGTAGAACGGAGTAACCTCGGTGTGCGGTTGTATGCC TGC TGTGGATTGCTGCTGTGCTTATCCACAACATT

TTGCGCACGGTTATGTGGACAAAATACCTGGTTACCCAGGCCGTGCCGGCACGTTAACCGGGCTGCATCCGATGCAAGTGTGTCGCTGTCGACGAGCTCG

CGAGCTCGGACATGAGGTTGCCCGTATTCAGTGTGCTGATTTGTATTGCTGAAAGTTGTTTTACGTTAAGTTGATGCAGATCAATTAATACGATACC

TGCGTATAAATTGATTATTTGACGTGGTTTGTATGGCTCCACGCACGTTGTGATATGTAGATGATAATCATTATCACTTTACGGGTCCTTTCCGGTGATC

CGACAGGTTACGGGGCGGCAGCTCGCGGGTTTTTCGCTATTTATGAAAATTTCCGGTTTAAAGCGTTTCCGTTCTTCTTCGTCATAACTTAATGTTTTT

ATTTAAAATACCTCTGAAAAGAAAGGAAACGACAGGTGCTGAAAGCGAGCTTTTTGGCCCTGTGCTGTTCCTTTCTCTGTTTTGTCCGTGGAATGAAC

AATGGAAGTCGAGCTCATCGCTAATAACTTCGTATAGCATACATTATACGAAGTTATATTCGAT

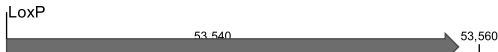

**Table S1. Primers used in this study.** This includes oligonucleotide primers used for constructing each fragment and final assembly of the SA75 genome via TAR-cloning as well as primers used for detection of each fragment junction and primers used to generate the 500 bp direct repeat at the 3' end of the cloned phage genome.

| Name         | Sequence                                                                                 | Description                                                                                                                                                                      |
|--------------|------------------------------------------------------------------------------------------|----------------------------------------------------------------------------------------------------------------------------------------------------------------------------------|
| SA75_Con1F   | GTAACAGATACTGCTGAACAACTAAATT<br>GAATGTTGAAGCtagggataacagggtaa<br>tgatcctctagagtcgacctg   | Forward primer to amplify TAR vector 01 from pCC1BAC/YCp (blue) and add I-SceI recognition site (red) as well as SA75 homology (capitals)                                        |
| SA75_Con1R   | CTTATATCAATCGTTGCGTTTATATATGC<br>TTGTTGTTGCATtagggataacagggtaa<br>tcgggtaccgagctcgaattc  | Reverse primer to amplify TAR vector 01 from pCC1BAC/YCp (blue) and add I-SceI recognition site (red) as well as SA75 homology (capitals)                                        |
| SA75_Con2F   | CGTATAGATAACATTGATGGAGAATTATGG<br>ATTTATTCAGCtagggataacagggtaa<br>gatcctctagagtcgacctg   | Forward primer to amplify TAR vector 02 from pCC1BAC/YCp (blue) and add I-SceI recognition site (red) as well as SA75 homology (capitals)                                        |
| SA75_Con2R   | CTAAATTAACAACCTCATCTGATGAATCA<br>ACTTCCGCTTCtagggataacagggtaa<br>cgggtaccgagctcgaattc    | Reverse primer to amplify TAR vector 02 from pCC1BAC/YCp (blue) and add I-SceI recognition site (red) as well as SA75 homology (capitals)                                        |
| SA75_Con3F   | CACTTCTAGAACATCAAGTATTGGCAGTA<br>CTGATAATTCCtagggataacagggtaa<br>gatcctctagagtcgacctg    | Forward primer to amplify TAR vector 03 from pCC1BAC/YCp (blue) and add I-SceI recognition site (red) as well as SA75 homology (capitals)                                        |
| SA75_Con3R   | CAAGCAATCTATCAATAAATTGTCCGTTG<br>GGCTTCAATCTAGtagggataacagggta<br>atcgggtaccgagctcgaattc | Reverse primer to amplify TAR vector 03 from pCC1BAC/YCp (blue) and add I-SceI recognition site (red) as well as SA75 homology (capitals)                                        |
| SA75_Con4F   | GCAAGACGAGAACGCAAAAGAGAAATGAA<br>GTGATCTAtagggataacagggtaatgat<br>cctctagagtcgacctg      | Forward primer to amplify TAR vector 04 from pCC1BAC/YCp (blue) and add I-SceI recognition site (red) as well as SA75 homology (capitals)                                        |
| SA75_Con4R   | GCTTTTCACCTCCTTACACATAATTTGTA<br>AGTCATCAACtagggataacagggtaatc<br>gggtaccgagctcgaattc    | Reverse primer to amplify TAR vector 04 from pCC1BAC/YCp (blue) and add I-SceI recognition site (red) as well as SA75 homology (capitals)                                        |
| SA97_Fwdrep  | GCAAGACGAGAACGCAAAAGAGAAATGAA<br>GTGATCTAATGCAACAACAAGCATATATA<br>AACGCAACG              | Forward primer to amplify the beginning 500 bp to add a direct repeat to the end of cloned SA75                                                                                  |
| SA75_Rev_500 | tactcaagcttgcacgctgcaggtcgac<br>tctagaggatctagggataacagggtaa<br>GGTTATAAGTATTATCAAAC     | Reverse primer to amplify the beginning 500 bp to add a direct repeat to the end of cloned SA75. pCC1BAC/YCp (blue), I-SceI recognition site (red), and SA75 homology (capitals) |

|                   |                                                                                        |                                                                                                                                                     |
|-------------------|----------------------------------------------------------------------------------------|-----------------------------------------------------------------------------------------------------------------------------------------------------|
| SA75_Con4F_repeat | CATTCACGTGATCCGTACTGGTTTGATAA<br>TACTTATAACCTagggataacagggtaat<br>gatcctctagagtcgacctg | Forward to amplify TAR final vector from pCC1BAC/YCp (blue) and add I-SceI recognition site (red) as well as SA75 500 bp repeat homology (capitals) |
| RCO495            | ACGACGGCCAGTGAATTG                                                                     | Forward primer to detect YCp/SA75 Fragment 1 junction                                                                                               |
| SA75_detR1        | GGCGCGTCTAAAGCTTCTGA                                                                   | Reverse primer to detect YCp/SA75 Fragment 1 junction                                                                                               |
| SA75_detF1        | ATCCGGATGAACCAGGTGGA                                                                   | Forward primer to detect SA75 Fragment 1/2 junction                                                                                                 |
| SA75_detR2        | GCACCTGGTTTATCAGCCCA                                                                   | Reverse primer to detect SA75 Fragment 1/2 junction                                                                                                 |
| SA75_detF2        | CAGCATGCCGTGACGGGTAC                                                                   | Forward primer to detect SA75 Fragment 2/3 junction                                                                                                 |
| SA75_detR3        | TGAGCATGCACCTTACCCGA                                                                   | Reverse primer to detect SA75 Fragment 2/3 junction                                                                                                 |
| SA75_detF3        | ATACATGGGAGGGGCAACGT                                                                   | Forward primer to detect SA75 Fragment 3/4 junction                                                                                                 |
| SA75_detR4        | TACTTCGCGCTTTCCTTGCC                                                                   | Reverse primer to detect SA75 Fragment 3/4 junction                                                                                                 |
| SA75_detF4        | CAGGAGCCCATTTAGGTGAGAC                                                                 | Forward primer to detect SA75 Fragment 4/YCp junction                                                                                               |
| RCO493            | CCAAGCTATTTAGGTGAGAC                                                                   | Reverse primer to detect SA75 Fragment 4/YCp junction                                                                                               |
